# Supplementary material for: Biotransformation of Ursonic Acid by Aspergillus ochraceus and Aspergillus oryzae to Discover Anti-Neuroinflammatory Derivatives
Source: MDPI journal article supplement (doi:10.3390/molecules28247943), 2023-12-05
Supplement: s1 [file s1]

## Supporting Information

# Biotransformation of Ursonic Acid by *Aspergillus ochraceus* and *Aspergillus oryzae* to Discover Anti-Neuroinflammatory Derivatives

Yan-Ni Wu<sup>1</sup>, Dan Su<sup>1</sup>, Jia Yang<sup>1</sup>, Ying Yi<sup>1</sup>, An-Dong Wang<sup>1</sup>, Min Yang<sup>1</sup>, Jian-Lin Li<sup>1</sup>, Bo-Yi Fan<sup>1</sup>,  
Guang-Tong Chen<sup>1,\*</sup>, Wen-Li Wang<sup>1</sup> and Bai Ling<sup>2,\*</sup>

<sup>1</sup> School of Pharmacy, Nantong University, 19 Qixiu Road, Nantong 226001, China;  
wangwenli16@126.com (W.-L.W.)

<sup>2</sup> Department of Pharmacy, The Fourth Affiliated Hospital of Nantong University, The First People's Hospital  
of Yancheng, 166 Yulongxi Road, Yancheng 224005, China

\* Correspondence: guangtong\_chen@163.com (G.-T.C.); 18005108889@163.com (B.L.)

## Table of contents

|                                                                                            |    |
|--------------------------------------------------------------------------------------------|----|
| <b>Table S1</b> Crystal data and structure refinement for compound <b>10</b> .....         | 5  |
| <b>Table S2</b> Crystal data and structure refinement for compound <b>13</b> .....         | 6  |
| <b>Table S3</b> Crystal data and structure refinement for compound <b>15</b> .....         | 7  |
| <b>Table S4</b> Crystal data and structure refinement for compound <b>19</b> .....         | 8  |
| <b>Figure S1</b> <sup>1</sup> H-NMR spectrum of compound <b>4</b> .....                    | 9  |
| <b>Figure S2</b> <sup>13</sup> C-NMR spectrum of compound <b>4</b> .....                   | 9  |
| <b>Figure S3</b> DEPT135 spectrum of compound <b>4</b> .....                               | 10 |
| <b>Figure S4</b> HSQC spectrum of compound <b>4</b> .....                                  | 10 |
| <b>Figure S5</b> <sup>1</sup> H- <sup>1</sup> H COSY spectrum of compound <b>4</b> .....   | 11 |
| <b>Figure S6</b> HMBC spectrum of compound <b>4</b> .....                                  | 11 |
| <b>Figure S7</b> NOESY spectrum of compound <b>4</b> .....                                 | 12 |
| <b>Figure S8</b> HR-ESI-MS spectrum of compound <b>4</b> .....                             | 12 |
| <b>Figure S9</b> <sup>1</sup> H-NMR spectrum of compound <b>5</b> .....                    | 13 |
| <b>Figure S10</b> <sup>13</sup> C-NMR spectrum of compound <b>5</b> .....                  | 13 |
| <b>Figure S11</b> DEPT135 spectrum of compound <b>5</b> .....                              | 14 |
| <b>Figure S12</b> HSQC spectrum of compound <b>5</b> .....                                 | 14 |
| <b>Figure S13</b> <sup>1</sup> H- <sup>1</sup> H COSY spectrum of compound <b>5</b> .....  | 15 |
| <b>Figure S14</b> HMBC spectrum of compound <b>5</b> .....                                 | 15 |
| <b>Figure S15</b> NOESY spectrum of compound <b>5</b> .....                                | 16 |
| <b>Figure S16</b> HR-ESI-MS spectrum of compound <b>5</b> .....                            | 16 |
| <b>Figure S17</b> <sup>1</sup> H-NMR spectrum of compound <b>7</b> .....                   | 17 |
| <b>Figure S18</b> <sup>13</sup> C-NMR spectrum of compound <b>7</b> .....                  | 17 |
| <b>Figure S19</b> DEPT135 spectrum of compound <b>7</b> .....                              | 18 |
| <b>Figure S20</b> HSQC spectrum of compound <b>7</b> .....                                 | 18 |
| <b>Figure S21</b> <sup>1</sup> H- <sup>1</sup> H COSY spectrum of compound <b>7</b> .....  | 19 |
| <b>Figure S22</b> HMBC spectrum of compound <b>7</b> .....                                 | 19 |
| <b>Figure S23</b> NOESY spectrum of compound <b>7</b> .....                                | 20 |
| <b>Figure S24</b> HR-ESI-MS spectrum of compound <b>7</b> .....                            | 20 |
| <b>Figure S25</b> <sup>1</sup> H-NMR spectrum of compound <b>8</b> .....                   | 21 |
| <b>Figure S26</b> <sup>13</sup> C-NMR spectrum of compound <b>8</b> .....                  | 21 |
| <b>Figure S27</b> DEPT135 spectrum of compound <b>8</b> .....                              | 22 |
| <b>Figure S28</b> HSQC spectrum of compound <b>8</b> .....                                 | 22 |
| <b>Figure S29</b> <sup>1</sup> H- <sup>1</sup> H COSY spectrum of compound <b>8</b> .....  | 23 |
| <b>Figure S30</b> HMBC spectrum of compound <b>8</b> .....                                 | 23 |
| <b>Figure S31</b> NOESY spectrum of compound <b>8</b> .....                                | 24 |
| <b>Figure S32</b> HR-ESI-MS spectrum of compound <b>8</b> .....                            | 24 |
| <b>Figure S33</b> <sup>1</sup> H-NMR spectrum of compound <b>9</b> .....                   | 25 |
| <b>Figure S34</b> <sup>13</sup> C-NMR spectrum of compound <b>9</b> .....                  | 25 |
| <b>Figure S35</b> DEPT135 spectrum of compound <b>9</b> .....                              | 26 |
| <b>Figure S36</b> HSQC spectrum of compound <b>9</b> .....                                 | 26 |
| <b>Figure S37</b> <sup>1</sup> H- <sup>1</sup> H COSY spectrum of compound <b>9</b> .....  | 27 |
| <b>Figure S38</b> HMBC spectrum of compound <b>9</b> .....                                 | 27 |
| <b>Figure S39</b> NOESY spectrum of compound <b>9</b> .....                                | 28 |
| <b>Figure S40</b> HR-ESI-MS spectrum of compound <b>9</b> .....                            | 28 |
| <b>Figure S41</b> <sup>1</sup> H-NMR spectrum of compound <b>10</b> .....                  | 29 |
| <b>Figure S42</b> <sup>13</sup> C-NMR spectrum of compound <b>10</b> .....                 | 29 |
| <b>Figure S43</b> DEPT135 spectrum of compound <b>10</b> .....                             | 30 |
| <b>Figure S44</b> HSQC spectrum of compound <b>10</b> .....                                | 30 |
| <b>Figure S45</b> <sup>1</sup> H- <sup>1</sup> H COSY spectrum of compound <b>10</b> ..... | 31 |
| <b>Figure S46</b> HMBC spectrum of compound <b>10</b> .....                                | 31 |
| <b>Figure S47</b> NOESY spectrum of compound <b>10</b> .....                               | 32 |
| <b>Figure S48</b> HR-ESI-MS spectrum of compound <b>10</b> .....                           | 32 |

|                                                                                          |    |
|------------------------------------------------------------------------------------------|----|
| <b>Figure S49</b> $^1\text{H}$ -NMR spectrum of compound <b>13</b> .....                 | 33 |
| <b>Figure S50</b> $^{13}\text{C}$ -NMR spectrum of compound <b>13</b> .....              | 33 |
| <b>Figure S51</b> DEPT135 spectrum of compound <b>13</b> .....                           | 34 |
| <b>Figure S52</b> HSQC spectrum of compound <b>13</b> .....                              | 34 |
| <b>Figure S53</b> $^1\text{H}$ - $^1\text{H}$ COSY spectrum of compound <b>13</b> .....  | 35 |
| <b>Figure S54</b> HMBC spectrum of compound <b>13</b> .....                              | 35 |
| <b>Figure S55</b> NOESY spectrum of compound <b>13</b> .....                             | 36 |
| <b>Figure S56</b> HR-ESI-MS spectrum of compound <b>13</b> .....                         | 36 |
| <b>Figure S57</b> $^1\text{H}$ -NMR spectrum of compound <b>14</b> .....                 | 37 |
| <b>Figure S58</b> $^{13}\text{C}$ -NMR spectrum of compound <b>14</b> .....              | 37 |
| <b>Figure S59</b> DEPT135 spectrum of compound <b>14</b> .....                           | 38 |
| <b>Figure S60</b> HSQC spectrum of compound <b>14</b> .....                              | 38 |
| <b>Figure S61</b> $^1\text{H}$ - $^1\text{H}$ COSY spectrum of compound <b>14</b> .....  | 39 |
| <b>Figure S62</b> HMBC spectrum of compound <b>14</b> .....                              | 39 |
| <b>Figure S63</b> NOESY spectrum of compound <b>14</b> .....                             | 40 |
| <b>Figure S64</b> HR-ESI-MS spectrum of compound <b>14</b> .....                         | 40 |
| <b>Figure S65</b> $^1\text{H}$ -NMR spectrum of compound <b>15</b> .....                 | 41 |
| <b>Figure S66</b> $^{13}\text{C}$ -NMR spectrum of compound <b>15</b> .....              | 41 |
| <b>Figure S67</b> DEPT135 spectrum of compound <b>15</b> .....                           | 42 |
| <b>Figure S68</b> HSQC spectrum of compound <b>15</b> .....                              | 42 |
| <b>Figure S69</b> $^1\text{H}$ - $^1\text{H}$ COSY spectrum of compound <b>15</b> .....  | 43 |
| <b>Figure S70</b> HMBC spectrum of compound <b>15</b> .....                              | 43 |
| <b>Figure S71</b> NOESY spectrum of compound <b>15</b> .....                             | 44 |
| <b>Figure S72</b> HR-ESI-MS spectrum of compound <b>15</b> .....                         | 44 |
| <b>Figure S73</b> $^1\text{H}$ -NMR spectrum of compound <b>16</b> .....                 | 45 |
| <b>Figure S74</b> $^{13}\text{C}$ -NMR spectrum of compound <b>16</b> .....              | 45 |
| <b>Figure S75</b> DEPT135 spectrum of compound <b>16</b> .....                           | 46 |
| <b>Figure S76</b> HSQC spectrum of compound <b>16</b> .....                              | 46 |
| <b>Figure S77</b> $^1\text{H}$ - $^1\text{H}$ COSY spectrum of compound <b>16</b> .....  | 47 |
| <b>Figure S78</b> HMBC spectrum of compound <b>16</b> .....                              | 47 |
| <b>Figure S79</b> NOESY spectrum of compound <b>16</b> .....                             | 48 |
| <b>Figure S80</b> HR-ESI-MS spectrum of compound <b>16</b> .....                         | 48 |
| <b>Figure S81</b> $^1\text{H}$ -NMR spectrum of compound <b>17</b> .....                 | 49 |
| <b>Figure S82</b> $^{13}\text{C}$ -NMR spectrum of compound <b>17</b> .....              | 49 |
| <b>Figure S83</b> DEPT135 spectrum of compound <b>17</b> .....                           | 50 |
| <b>Figure S84</b> HSQC spectrum of compound <b>17</b> .....                              | 50 |
| <b>Figure S85</b> $^1\text{H}$ - $^1\text{H}$ COSY spectrum of compound <b>17</b> .....  | 51 |
| <b>Figure S86</b> HMBC spectrum of compound <b>17</b> .....                              | 51 |
| <b>Figure S87</b> NOESY spectrum of compound <b>17</b> .....                             | 52 |
| <b>Figure S88</b> HR-ESI-MS spectrum of compound <b>17</b> .....                         | 52 |
| <b>Figure S89</b> $^1\text{H}$ -NMR spectrum of compound <b>18</b> .....                 | 53 |
| <b>Figure S90</b> $^{13}\text{C}$ -NMR spectrum of compound <b>18</b> .....              | 53 |
| <b>Figure S91</b> DEPT135 spectrum of compound <b>18</b> .....                           | 54 |
| <b>Figure S92</b> HSQC spectrum of compound <b>18</b> .....                              | 54 |
| <b>Figure S93</b> $^1\text{H}$ - $^1\text{H}$ COSY spectrum of compound <b>18</b> .....  | 55 |
| <b>Figure S94</b> HMBC spectrum of compound <b>18</b> .....                              | 55 |
| <b>Figure S95</b> NOESY spectrum of compound <b>18</b> .....                             | 56 |
| <b>Figure S96</b> HR-ESI-MS spectrum of compound <b>18</b> .....                         | 56 |
| <b>Figure S97</b> $^1\text{H}$ -NMR spectrum of compound <b>19</b> .....                 | 57 |
| <b>Figure S98</b> $^{13}\text{C}$ -NMR spectrum of compound <b>19</b> .....              | 57 |
| <b>Figure S99</b> DEPT135 spectrum of compound <b>19</b> .....                           | 58 |
| <b>Figure S100</b> HSQC spectrum of compound <b>19</b> .....                             | 58 |
| <b>Figure S101</b> $^1\text{H}$ - $^1\text{H}$ COSY spectrum of compound <b>19</b> ..... | 59 |

|                                                                   |    |
|-------------------------------------------------------------------|----|
| <b>Figure S102</b> HMBC spectrum of compound <b>19</b> .....      | 59 |
| <b>Figure S103</b> NOESY spectrum of compound <b>19</b> .....     | 60 |
| <b>Figure S104</b> HR-ESI-MS spectrum of compound <b>19</b> ..... | 60 |



**Table S1.** Crystal data and structure refinement for compound **10**

|                                             |                                                                |
|---------------------------------------------|----------------------------------------------------------------|
| Identification code                         | cu_20221190_0m_sq_sq                                           |
| Empirical formula                           | C <sub>31</sub> H <sub>48</sub> O <sub>3</sub>                 |
| Formula weight                              | 468.69                                                         |
| Temperature/K                               | 173.0                                                          |
| Crystal system                              | monoclinic                                                     |
| Space group                                 | P2 <sub>1</sub>                                                |
| a/Å                                         | 14.3799(8)                                                     |
| b/Å                                         | 7.9576(4)                                                      |
| c/Å                                         | 24.7623(15)                                                    |
| $\alpha$ /°                                 | 90                                                             |
| $\beta$ /°                                  | 101.068(4)                                                     |
| $\gamma$ /°                                 | 90                                                             |
| Volume/Å <sup>3</sup>                       | 2780.8(3)                                                      |
| Z                                           | 4                                                              |
| $\rho_{\text{calc}}/\text{cm}^3$            | 1.119                                                          |
| $\mu/\text{mm}^{-1}$                        | 0.537                                                          |
| F(000)                                      | 1032.0                                                         |
| Crystal size/mm <sup>3</sup>                | 0.07 × 0.03 × 0.01                                             |
| Radiation                                   | CuK $\alpha$ ( $\lambda$ = 1.54178)                            |
| 2 $\Theta$ range for data collection/°      | 6.262 to 124.748                                               |
| Index ranges                                | -16 ≤ h ≤ 16, -5 ≤ k ≤ 9, -28 ≤ l ≤ 26                         |
| Reflections collected                       | 12677                                                          |
| Independent reflections                     | 6322 [ $R_{\text{int}}$ = 0.0856, $R_{\text{sigma}}$ = 0.1046] |
| Data/restraints/parameters                  | 6322/1/631                                                     |
| Goodness-of-fit on F <sup>2</sup>           | 1.142                                                          |
| Final R indexes [ $I \geq 2\sigma(I)$ ]     | $R_1$ = 0.1085, $wR_2$ = 0.2960                                |
| Final R indexes [all data]                  | $R_1$ = 0.1502, $wR_2$ = 0.3421                                |
| Largest diff. peak/hole / e Å <sup>-3</sup> | 0.51/-0.39                                                     |
| Flack parameter                             | -0.4(5)                                                        |

**Table S2.** Crystal data and structure refinement for compound **13**

|                                             |                                                               |
|---------------------------------------------|---------------------------------------------------------------|
| Identification code                         | XJTS13_0m                                                     |
| Empirical formula                           | C <sub>30</sub> H <sub>44</sub> O <sub>5</sub>                |
| Formula weight                              | 484.65                                                        |
| Temperature/K                               | 170.0                                                         |
| Crystal system                              | orthorhombic                                                  |
| Space group                                 | P2 <sub>1</sub> 2 <sub>1</sub> 2 <sub>1</sub>                 |
| a/Å                                         | 6.70930(10)                                                   |
| b/Å                                         | 14.3484(2)                                                    |
| c/Å                                         | 26.2474(4)                                                    |
| $\alpha$ /°                                 | 90                                                            |
| $\beta$ /°                                  | 90                                                            |
| $\gamma$ /°                                 | 90                                                            |
| Volume/Å <sup>3</sup>                       | 2526.78(6)                                                    |
| Z                                           | 4                                                             |
| $\rho_{\text{calc}}/\text{cm}^3$            | 1.274                                                         |
| $\mu/\text{mm}^{-1}$                        | 0.672                                                         |
| F(000)                                      | 1056.0                                                        |
| Crystal size/mm <sup>3</sup>                | 0.12 × 0.08 × 0.05                                            |
| Radiation                                   | CuK $\alpha$ ( $\lambda$ = 1.54178)                           |
| 2 $\Theta$ range for data collection/°      | 6.736 to 149.31                                               |
| Index ranges                                | -8 ≤ h ≤ 7, -17 ≤ k ≤ 17, -32 ≤ l ≤ 32                        |
| Reflections collected                       | 33867                                                         |
| Independent reflections                     | 5138 [R <sub>int</sub> = 0.0539, R <sub>sigma</sub> = 0.0344] |
| Data/restraints/parameters                  | 5138/0/324                                                    |
| Goodness-of-fit on F <sup>2</sup>           | 1.058                                                         |
| Final R indexes [I ≥ 2 $\sigma$ (I)]        | R <sub>1</sub> = 0.0367, wR <sub>2</sub> = 0.0887             |
| Final R indexes [all data]                  | R <sub>1</sub> = 0.0406, wR <sub>2</sub> = 0.0919             |
| Largest diff. peak/hole / e Å <sup>-3</sup> | 0.28/-0.19                                                    |
| Flack parameter                             | 0.08(8)                                                       |

**Table S3.** Crystal data and structure refinement for compound **15**

|                                             |                                                                |
|---------------------------------------------|----------------------------------------------------------------|
| Identification code                         | x45_0m                                                         |
| Empirical formula                           | C <sub>30</sub> H <sub>46</sub> O <sub>7</sub>                 |
| Formula weight                              | 518.67                                                         |
| Temperature/K                               | 170.0                                                          |
| Crystal system                              | monoclinic                                                     |
| Space group                                 | P2 <sub>1</sub>                                                |
| a/Å                                         | 12.3958(7)                                                     |
| b/Å                                         | 7.8656(5)                                                      |
| c/Å                                         | 28.4418(17)                                                    |
| $\alpha$ /°                                 | 90                                                             |
| $\beta$ /°                                  | 96.882(3)                                                      |
| $\gamma$ /°                                 | 90                                                             |
| Volume/Å <sup>3</sup>                       | 2753.1(3)                                                      |
| Z                                           | 4                                                              |
| $\rho_{\text{calc}}/\text{cm}^3$            | 1.251                                                          |
| $\mu/\text{mm}^{-1}$                        | 0.705                                                          |
| F(000)                                      | 1128.0                                                         |
| Crystal size/mm <sup>3</sup>                | 0.08 × 0.05 × 0.04                                             |
| Radiation                                   | CuK $\alpha$ ( $\lambda$ = 1.54178)                            |
| 2 $\Theta$ range for data collection/°      | 6.26 to 150.308                                                |
| Index ranges                                | -14 ≤ h ≤ 15, -9 ≤ k ≤ 9, -35 ≤ l ≤ 35                         |
| Reflections collected                       | 35468                                                          |
| Independent reflections                     | 10864 [R <sub>int</sub> = 0.0527, R <sub>sigma</sub> = 0.0523] |
| Data/restraints/parameters                  | 10864/10/698                                                   |
| Goodness-of-fit on F <sup>2</sup>           | 1.090                                                          |
| Final R indexes [I ≥ 2 $\sigma$ (I)]        | R <sub>1</sub> = 0.0854, wR <sub>2</sub> = 0.2337              |
| Final R indexes [all data]                  | R <sub>1</sub> = 0.0877, wR <sub>2</sub> = 0.2352              |
| Largest diff. peak/hole / e Å <sup>-3</sup> | 0.49/-0.37                                                     |
| Flack parameter                             | 0.04(6)                                                        |

**Table S4.** Crystal data and structure refinement for compound **19**

|                                             |                                                                |
|---------------------------------------------|----------------------------------------------------------------|
| Identification code                         | 12_0m                                                          |
| Empirical formula                           | C <sub>30</sub> H <sub>44</sub> O <sub>6</sub>                 |
| Formula weight                              | 500.65                                                         |
| Temperature/K                               | 170.0                                                          |
| Crystal system                              | orthorhombic                                                   |
| Space group                                 | P2 <sub>1</sub> 2 <sub>1</sub> 2 <sub>1</sub>                  |
| a/Å                                         | 6.4846(2)                                                      |
| b/Å                                         | 14.6936(6)                                                     |
| c/Å                                         | 28.2892(12)                                                    |
| $\alpha$ /°                                 | 90                                                             |
| $\beta$ /°                                  | 90                                                             |
| $\gamma$ /°                                 | 90                                                             |
| Volume/Å <sup>3</sup>                       | 2695.46(18)                                                    |
| Z                                           | 4                                                              |
| $\rho_{\text{calc}}/\text{cm}^3$            | 1.234                                                          |
| $\mu/\text{mm}^{-1}$                        | 0.675                                                          |
| F(000)                                      | 1088.0                                                         |
| Crystal size/mm <sup>3</sup>                | 0.09 × 0.06 × 0.05                                             |
| Radiation                                   | CuK $\alpha$ ( $\lambda$ = 1.54178)                            |
| 2 $\Theta$ range for data collection/°      | 6.248 to 149.172                                               |
| Index ranges                                | -7 ≤ h ≤ 8, -18 ≤ k ≤ 18, -33 ≤ l ≤ 34                         |
| Reflections collected                       | 43437                                                          |
| Independent reflections                     | 5462 [ $R_{\text{int}}$ = 0.0744, $R_{\text{sigma}}$ = 0.0361] |
| Data/restraints/parameters                  | 5462/0/336                                                     |
| Goodness-of-fit on F <sup>2</sup>           | 1.030                                                          |
| Final R indexes [ $I \geq 2\sigma(I)$ ]     | $R_1$ = 0.0465, $wR_2$ = 0.1185                                |
| Final R indexes [all data]                  | $R_1$ = 0.0534, $wR_2$ = 0.1239                                |
| Largest diff. peak/hole / e Å <sup>-3</sup> | 0.38/-0.17                                                     |
| Flack parameter                             | -0.09(10)                                                      |

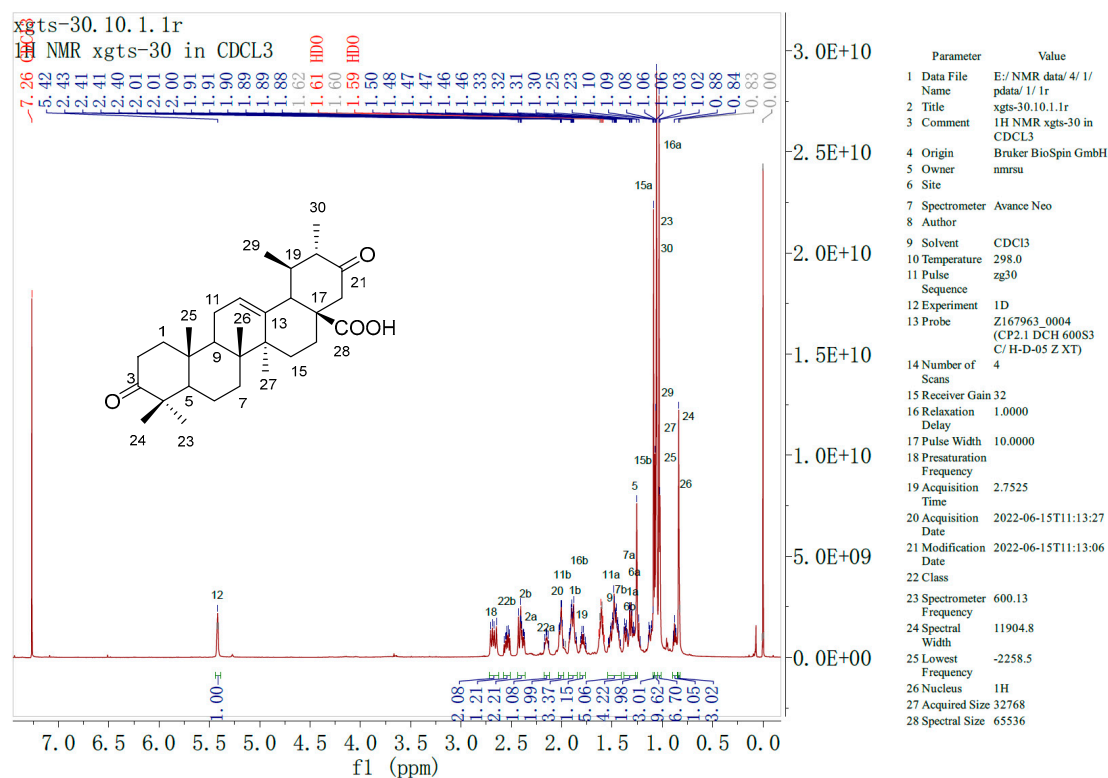

**Figure S1** <sup>1</sup>H NMR spectrum (400 MHz) of compound **4** in CDCl<sub>3</sub>

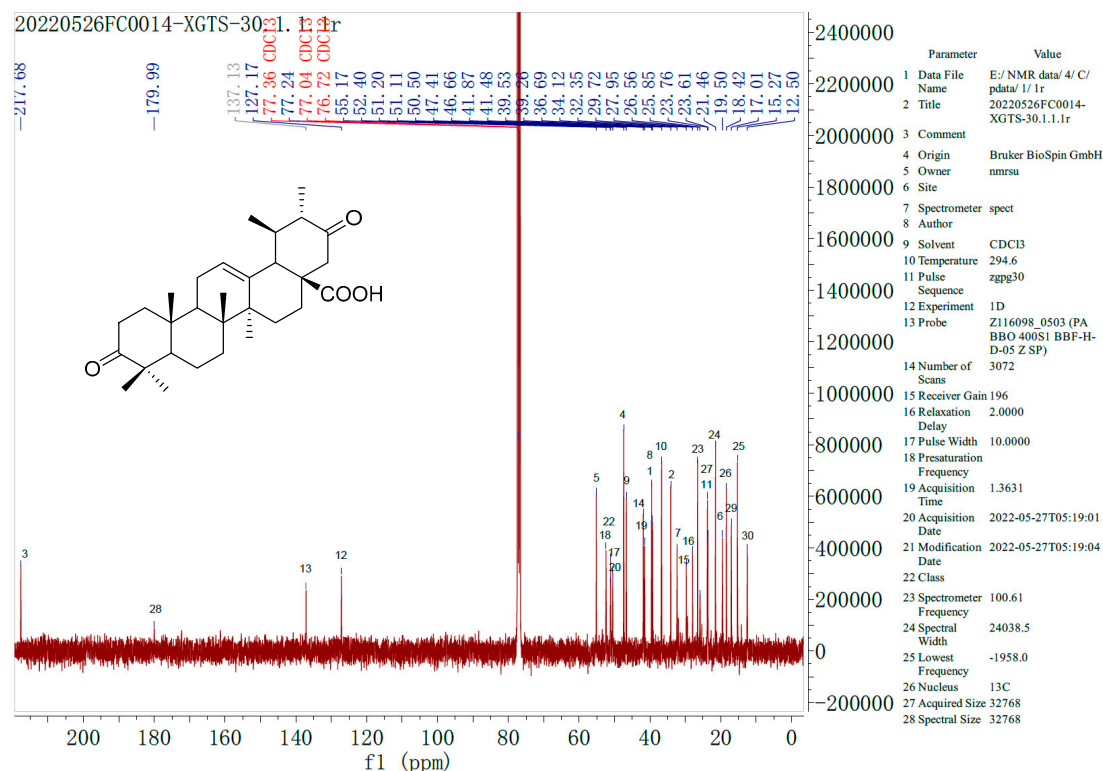

**Figure S2** <sup>13</sup>C NMR spectrum (100 MHz) of compound **4** in CDCl<sub>3</sub>

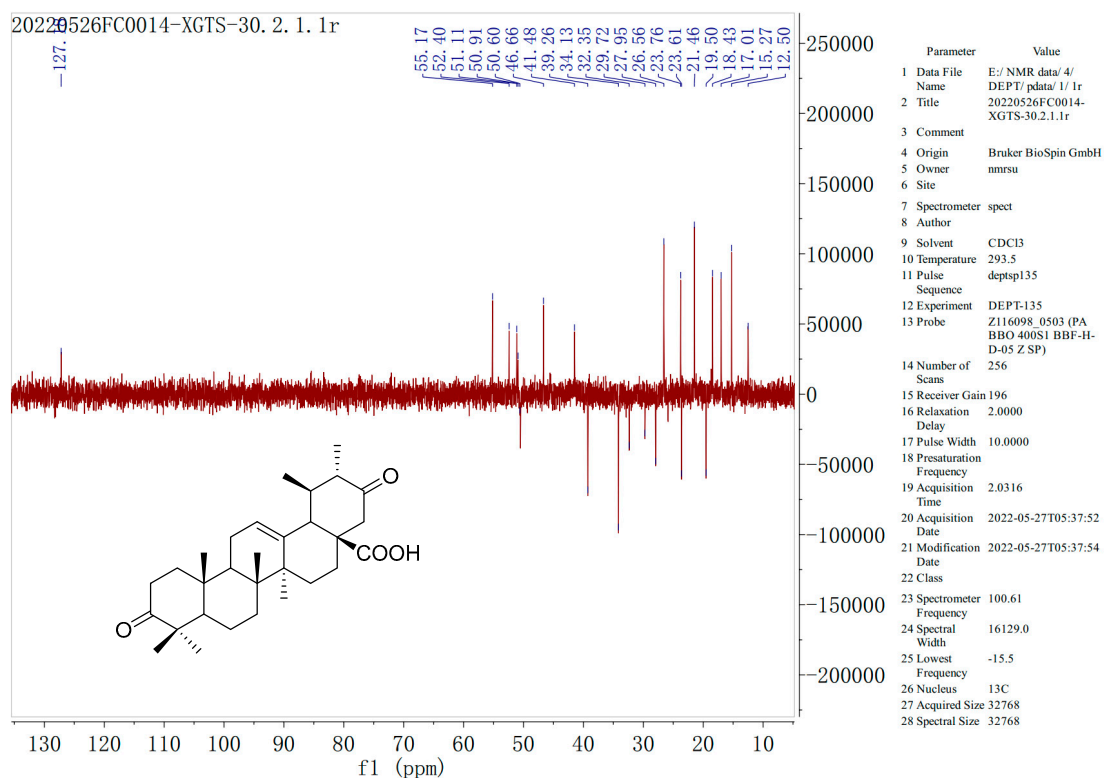

Figure S3 DEPT-135 spectrum (100 MHz) of compound **4** in CDCl<sub>3</sub>

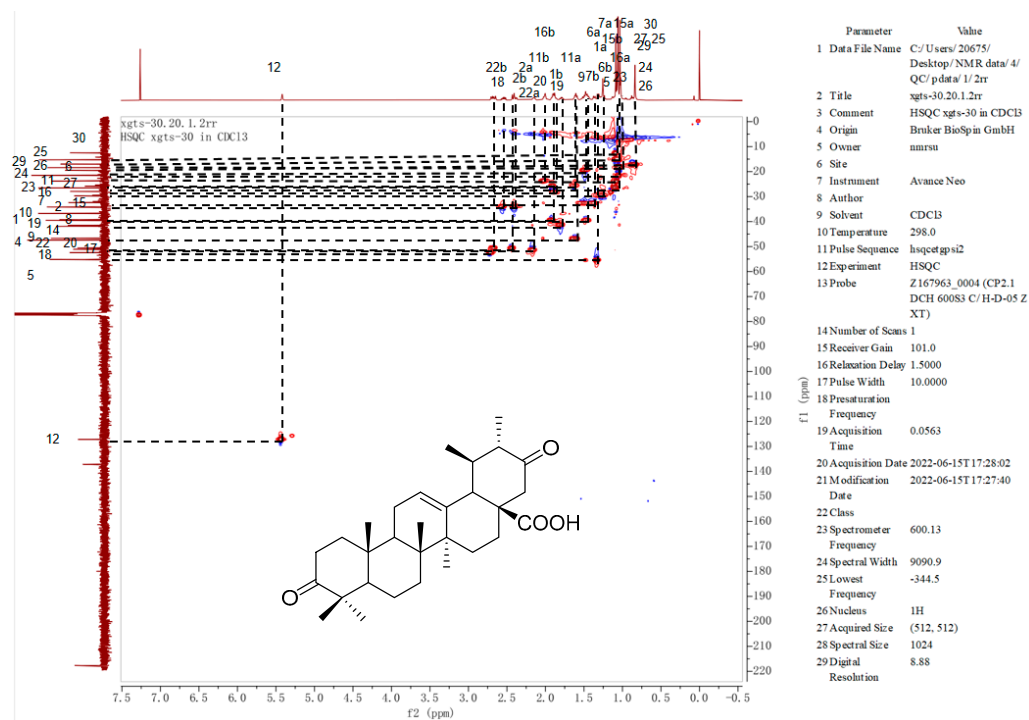

Figure S4 HSQC spectrum (100 MHz) of compound **4** in CDCl<sub>3</sub>

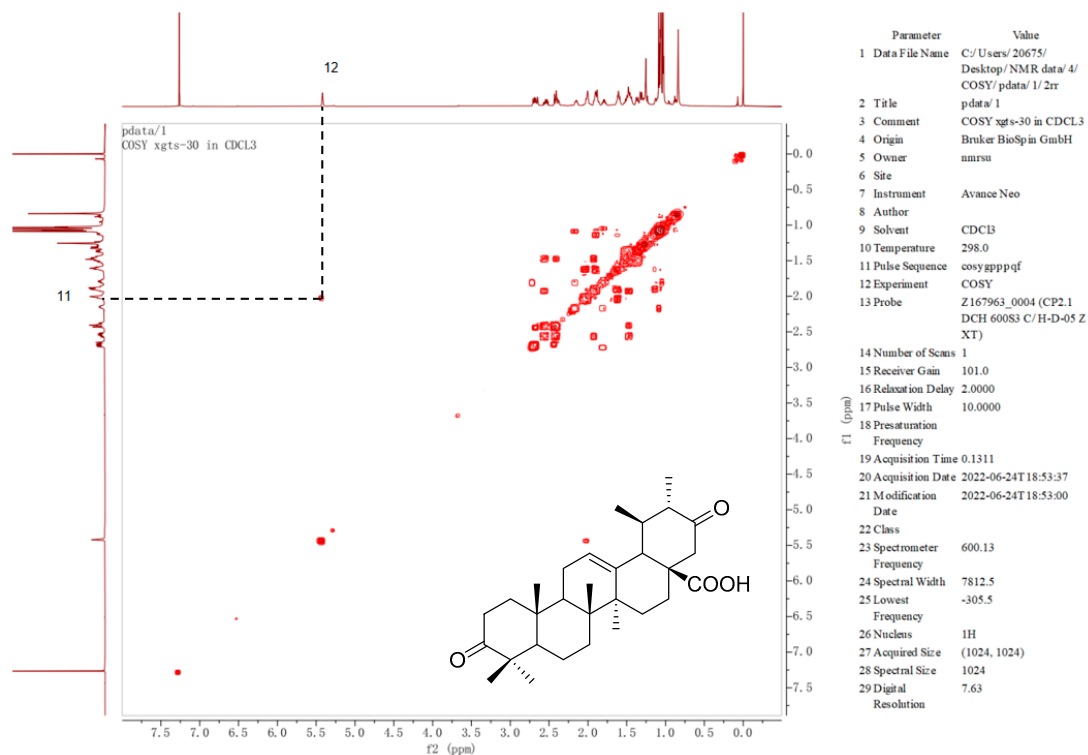

**Figure S5**  $^1\text{H}$ - $^1\text{H}$  COSY spectrum (400 MHz) of compound **4** in  $\text{CDCl}_3$

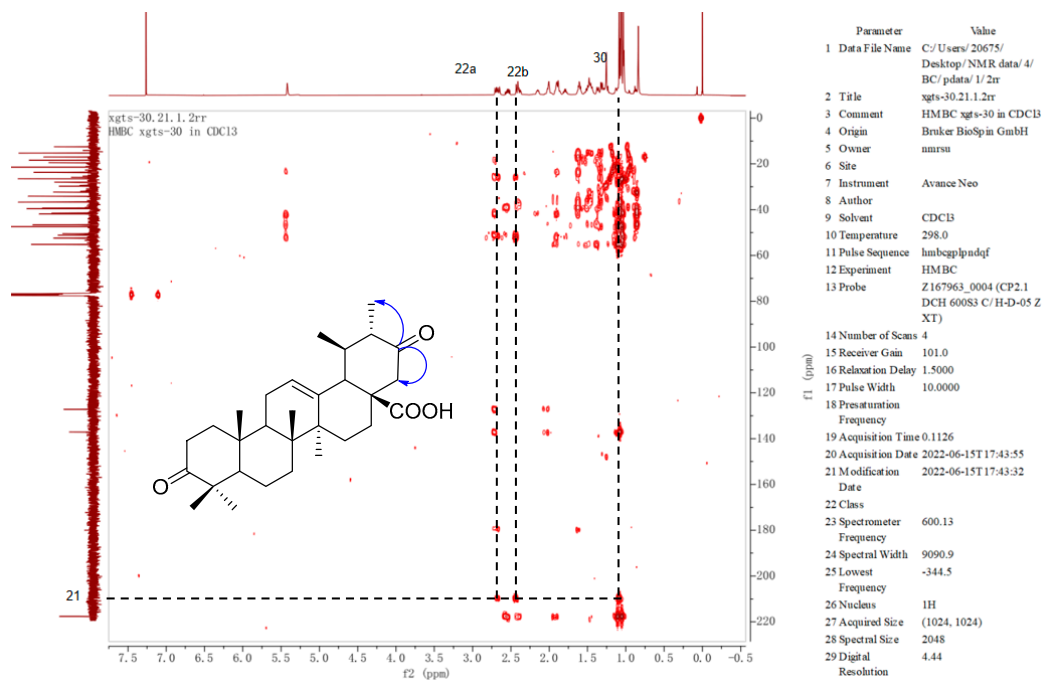

**Figure S6** HMBC spectrum (100 MHz) of compound **4** in  $\text{CDCl}_3$

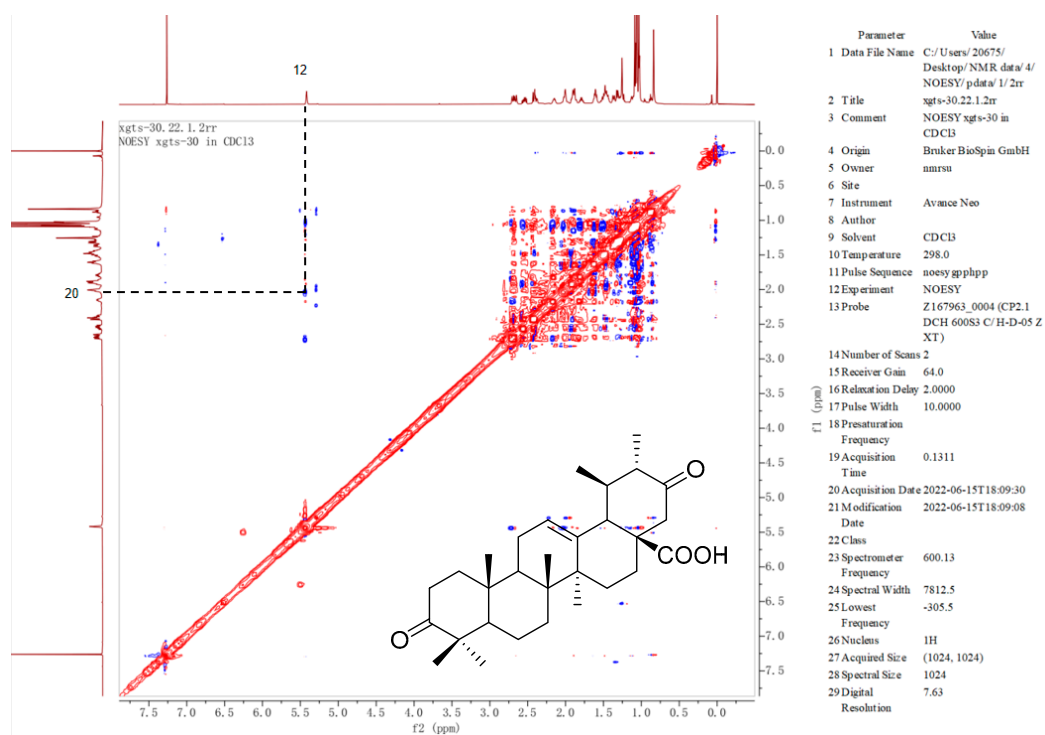

**Figure S7** NOESY spectrum (400 MHz) of compound **4** in CDCl<sub>3</sub>

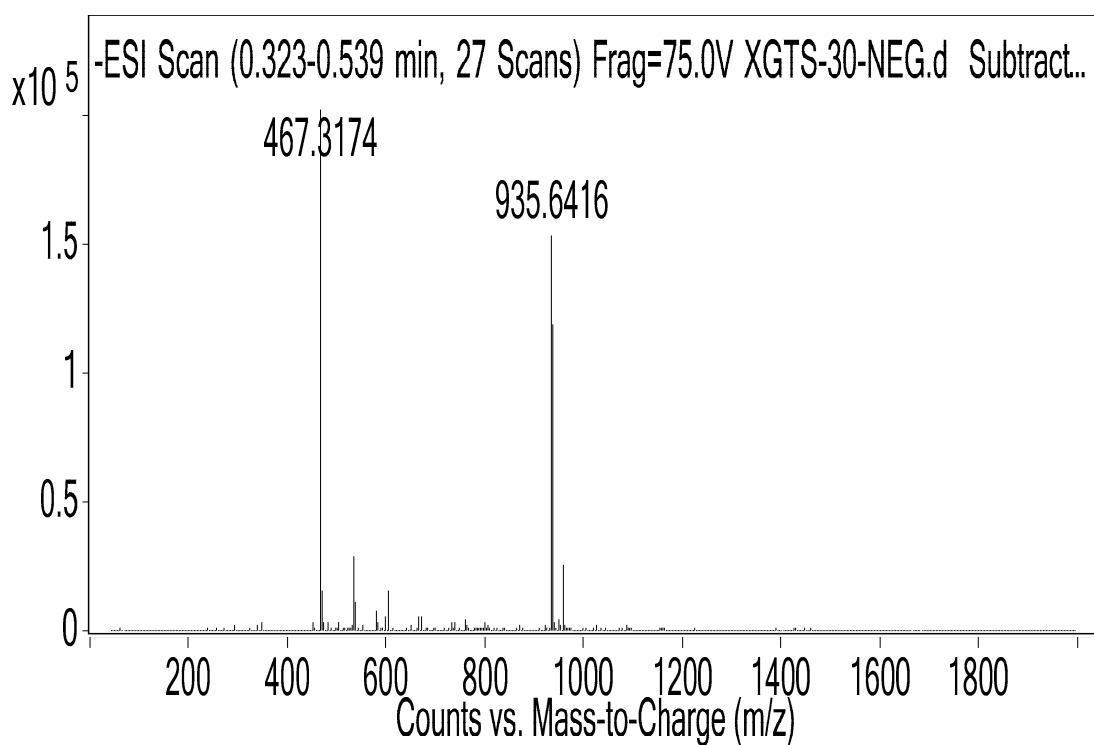

**Figure S8** HR-ESI-MS spectrum of compound **4**



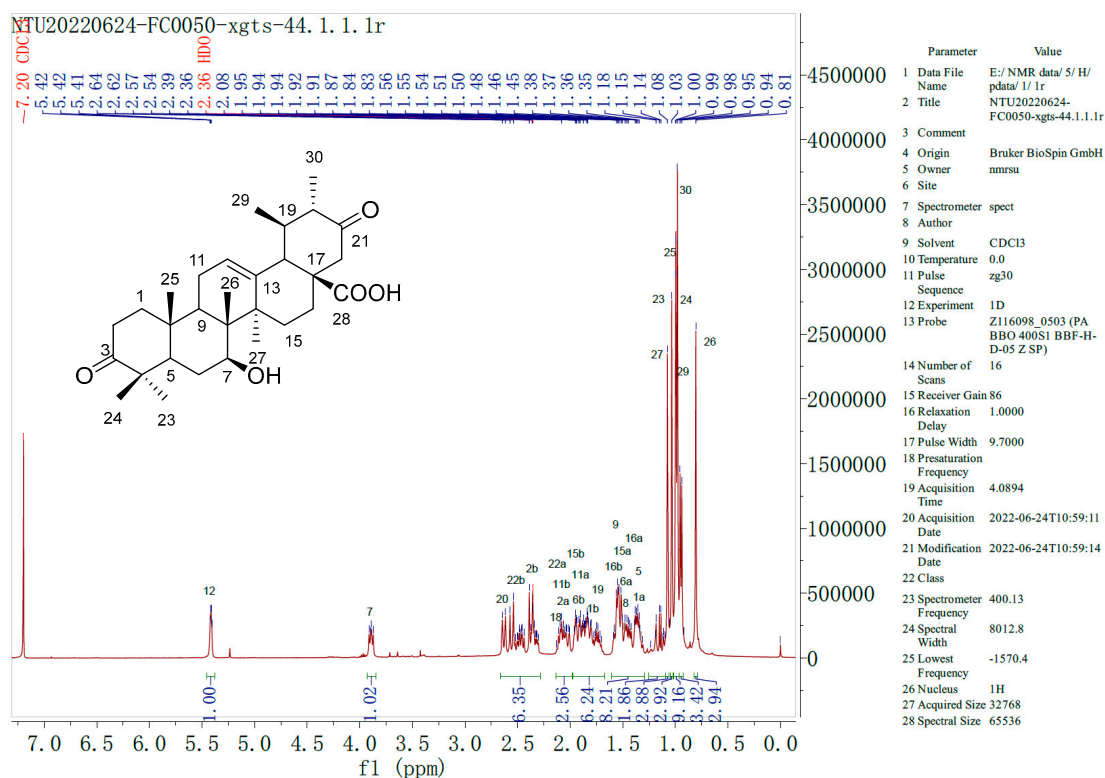

Figure S9  $^1\text{H}$  NMR spectrum (400 MHz) of compound **5** in  $\text{CDCl}_3$

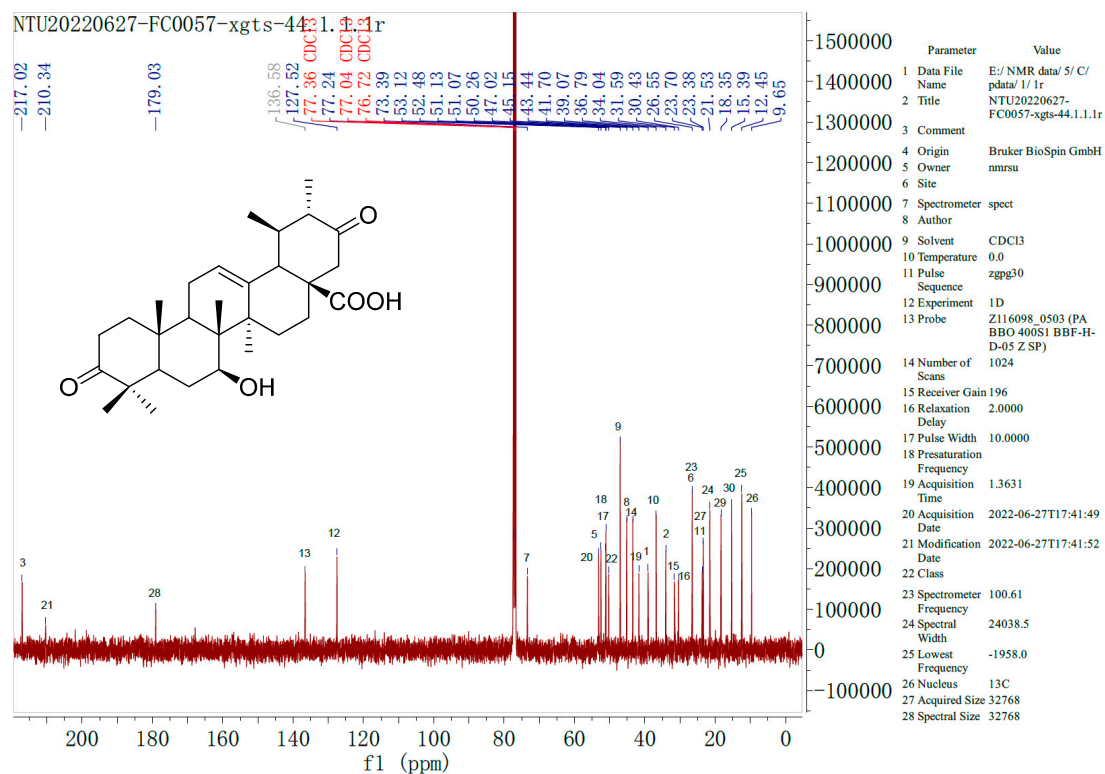

Figure S10  $^{13}\text{C}$  NMR spectrum (100 MHz) of compound **5** in  $\text{CDCl}_3$

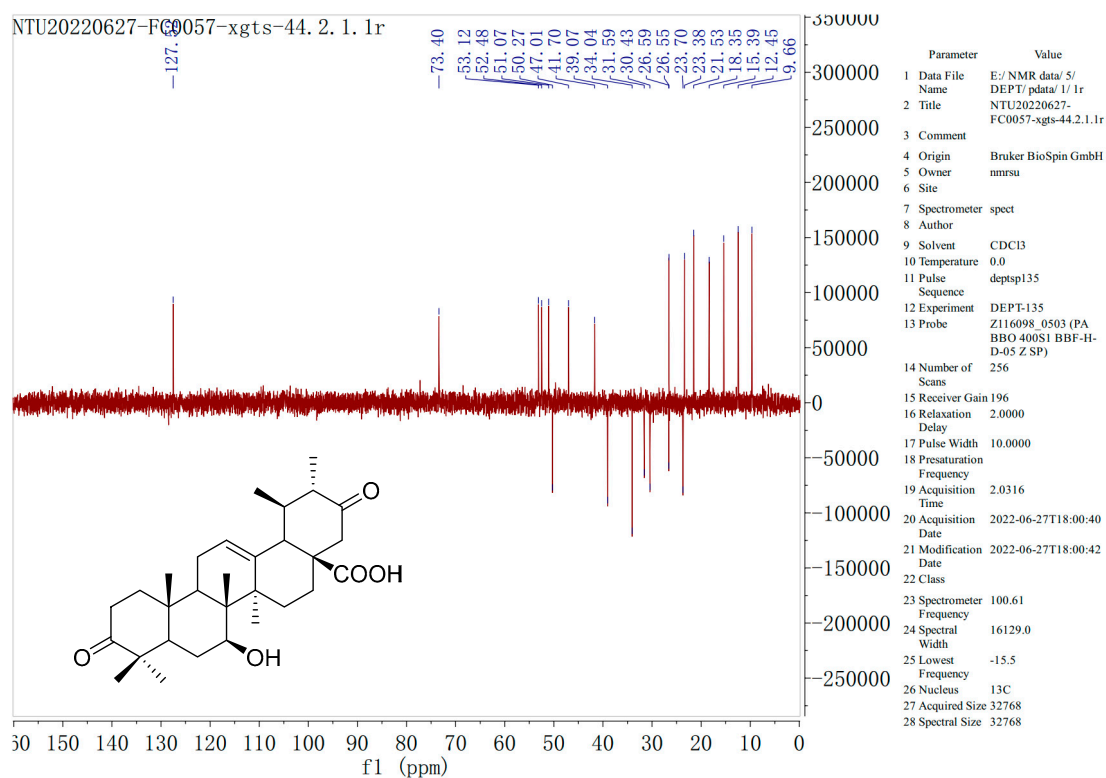

Figure S11 DEPT-135 spectrum (100 MHz) of compound **5** in CDCl<sub>3</sub>

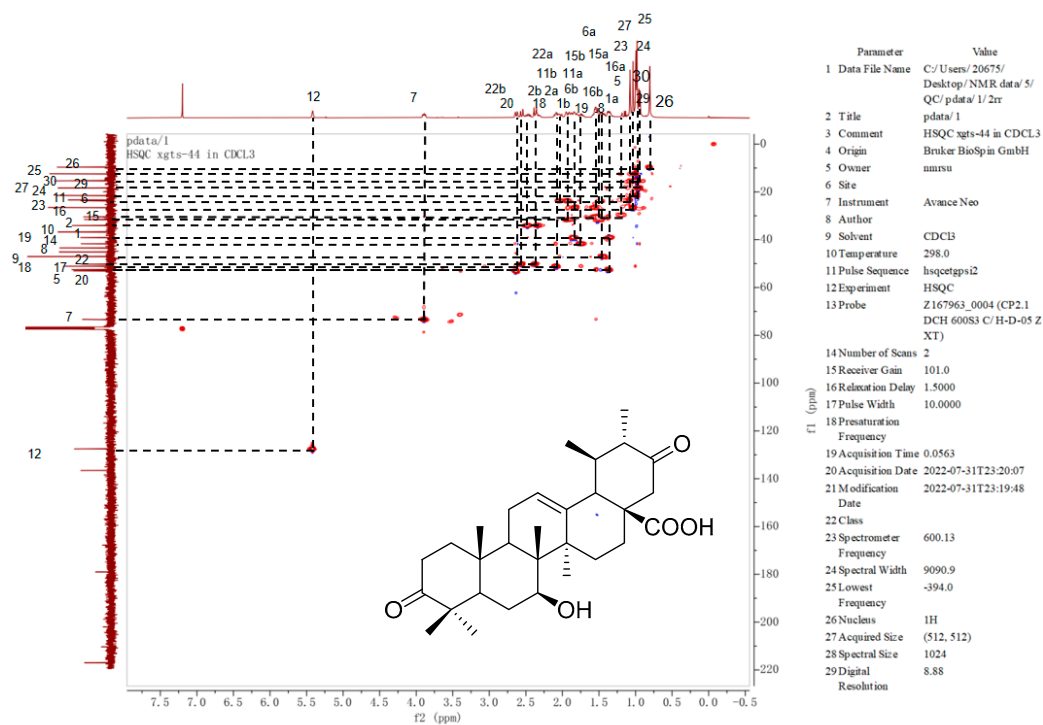

Figure S12 HSQC spectrum (100 MHz) of compound **5** in CDCl<sub>3</sub>

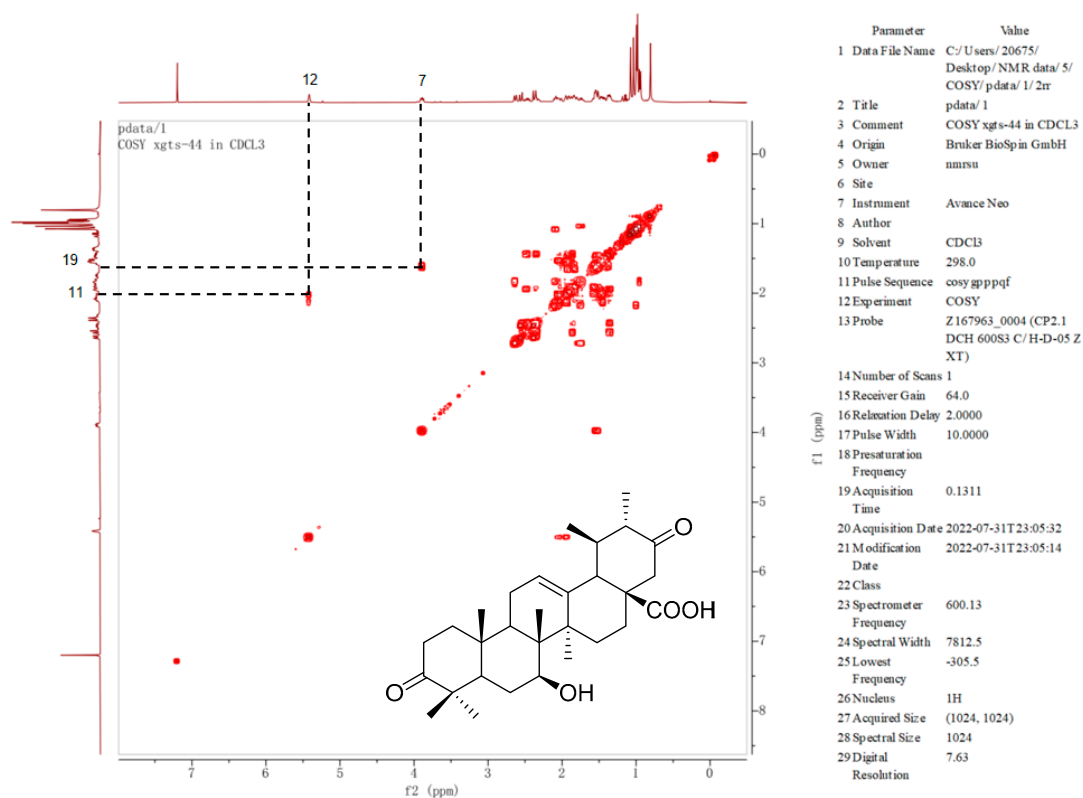

**Figure S13**  $^1\text{H}$ - $^1\text{H}$  COSY spectrum (400 MHz) of compound **5** in  $\text{CDCl}_3$

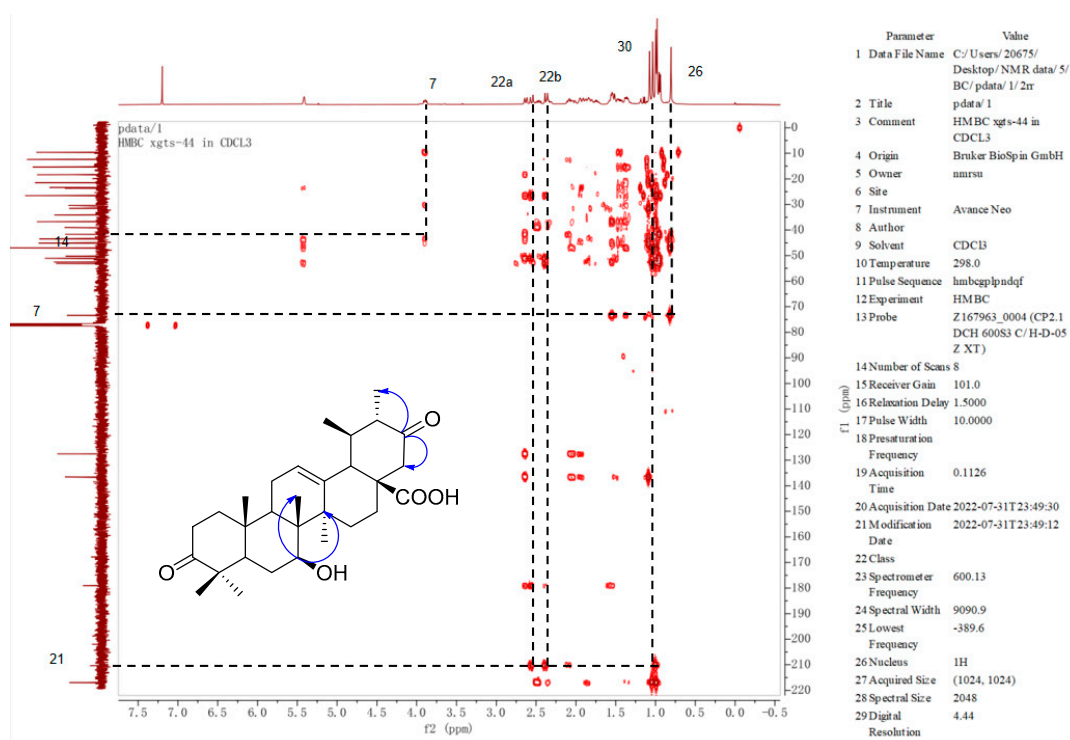

**Figure S14** HMBC spectrum (100 MHz) of compound **5** in  $\text{CDCl}_3$

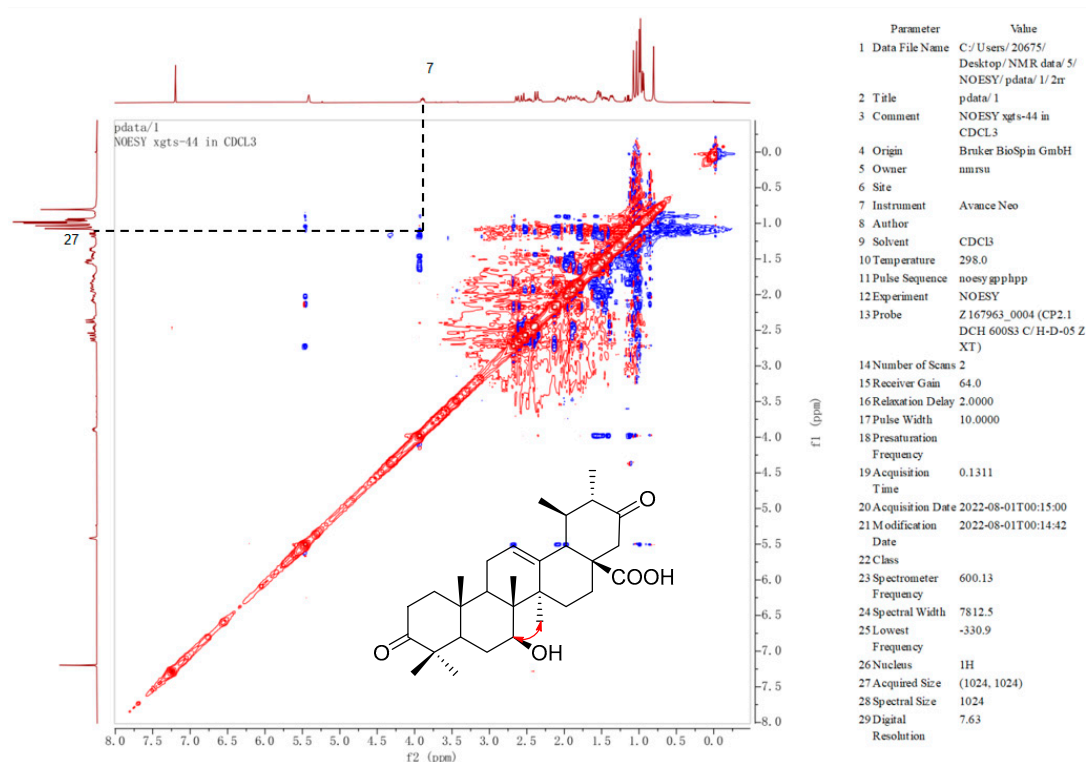

**Figure S15** NOESY spectrum (400 MHz) of compound **5** in CDCl<sub>3</sub>

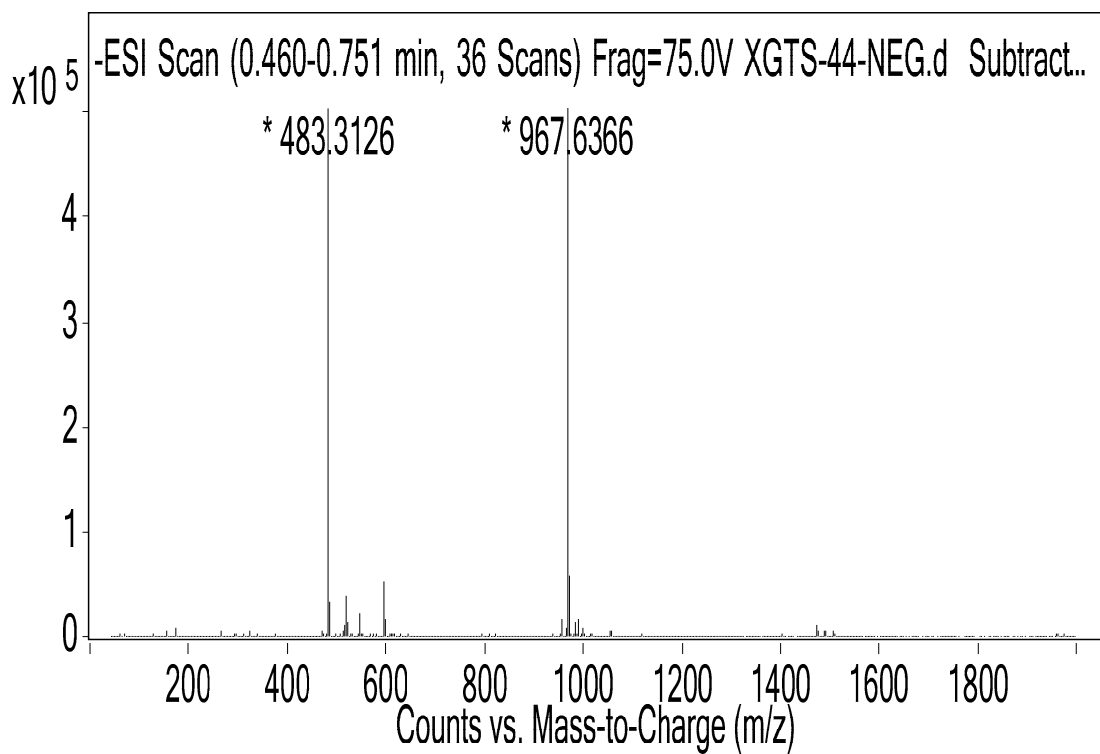

**Figure S16** HR-ESI-MS spectrum of compound **5**





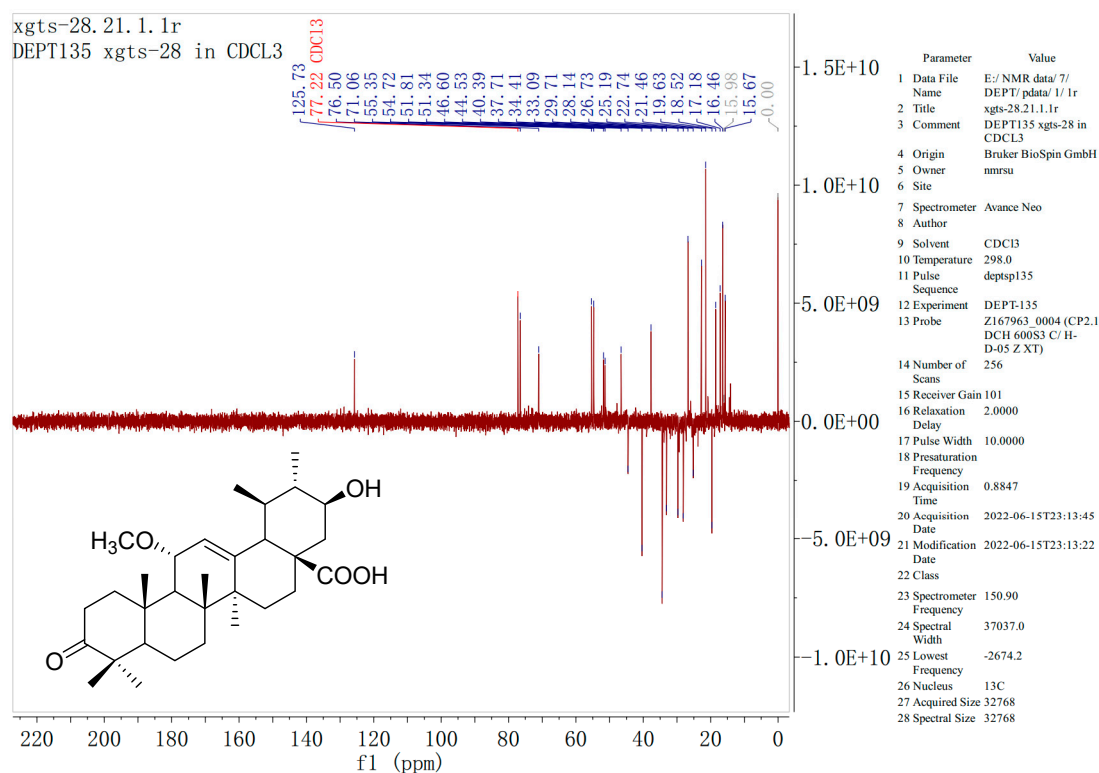

**Figure S19** DEPT-135 spectrum (150 MHz) of compound **7** in CDCl<sub>3</sub>

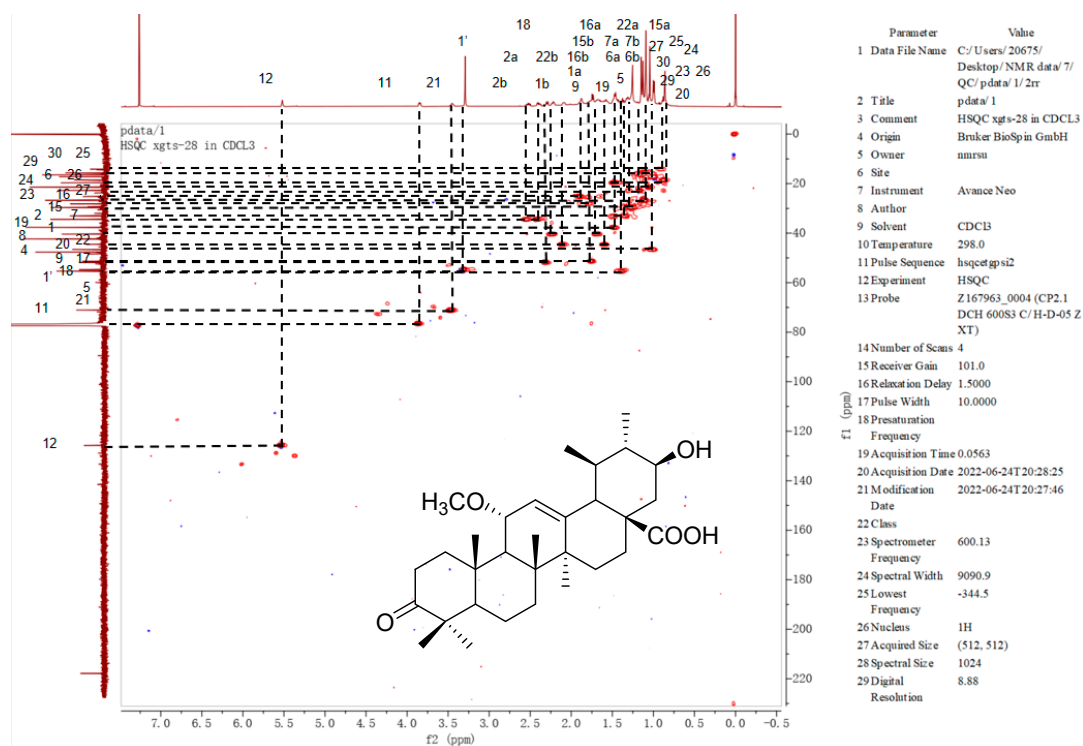

**Figure S20** HSQC spectrum (150 MHz) of compound **7** in CDCl<sub>3</sub>

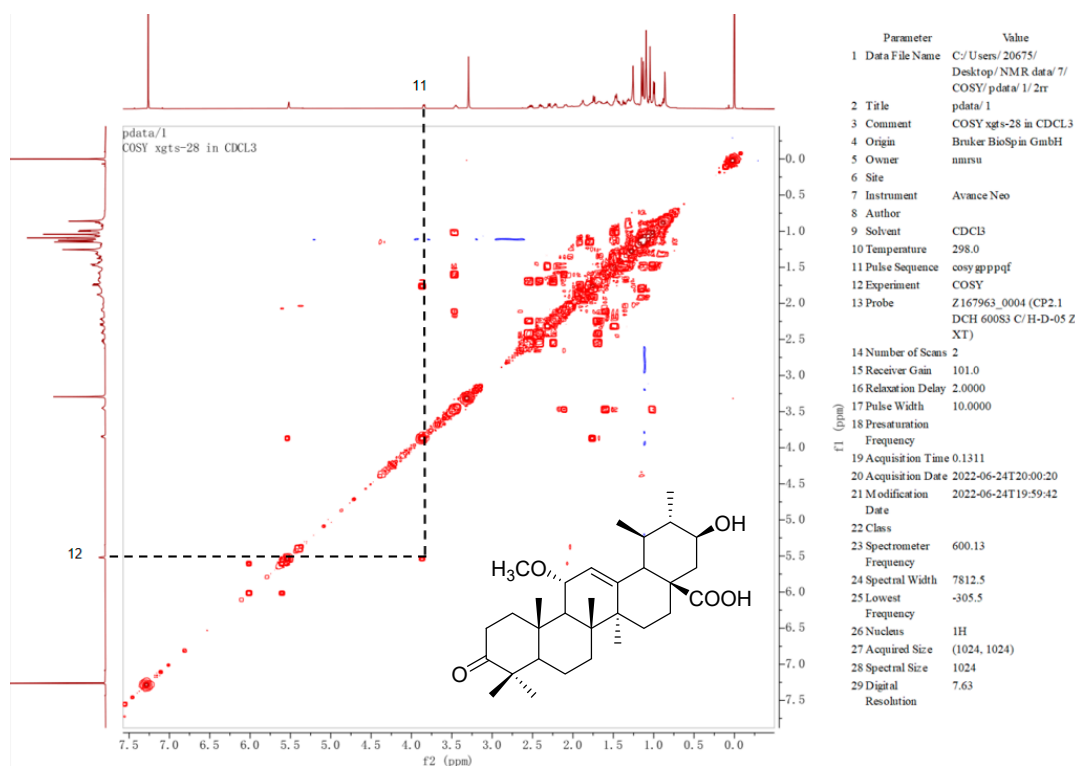

**Figure S21**  $^1\text{H}$ - $^1\text{H}$  COSY spectrum (600 MHz) of compound **7** in  $\text{CDCl}_3$

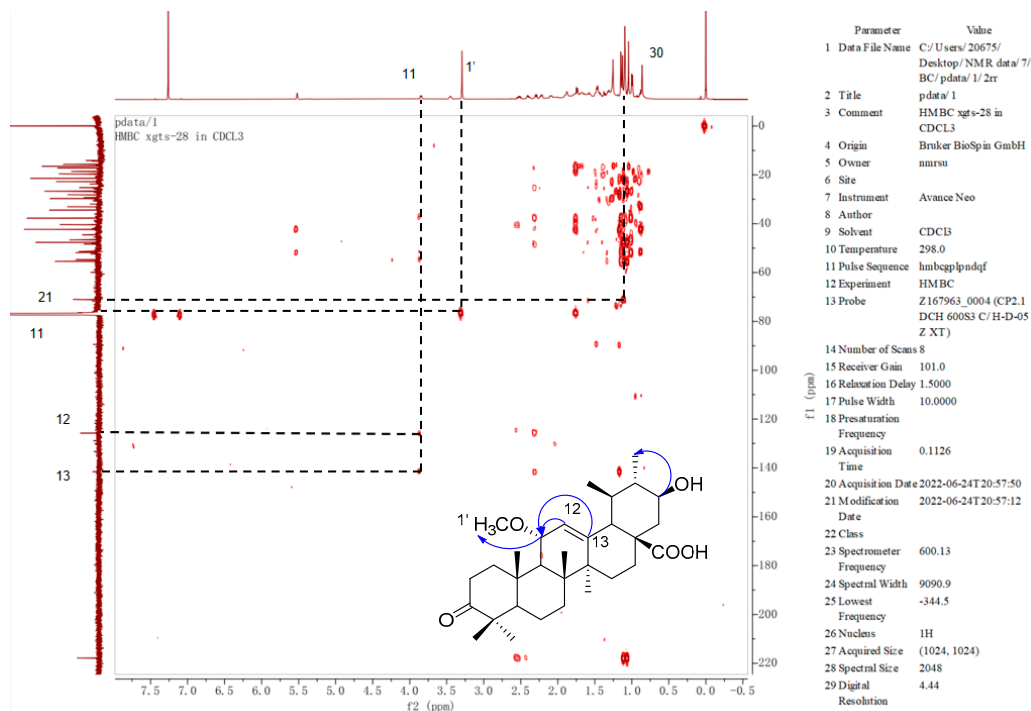

**Figure S22** HMBC spectrum (150 MHz) of compound **7** in  $\text{CDCl}_3$

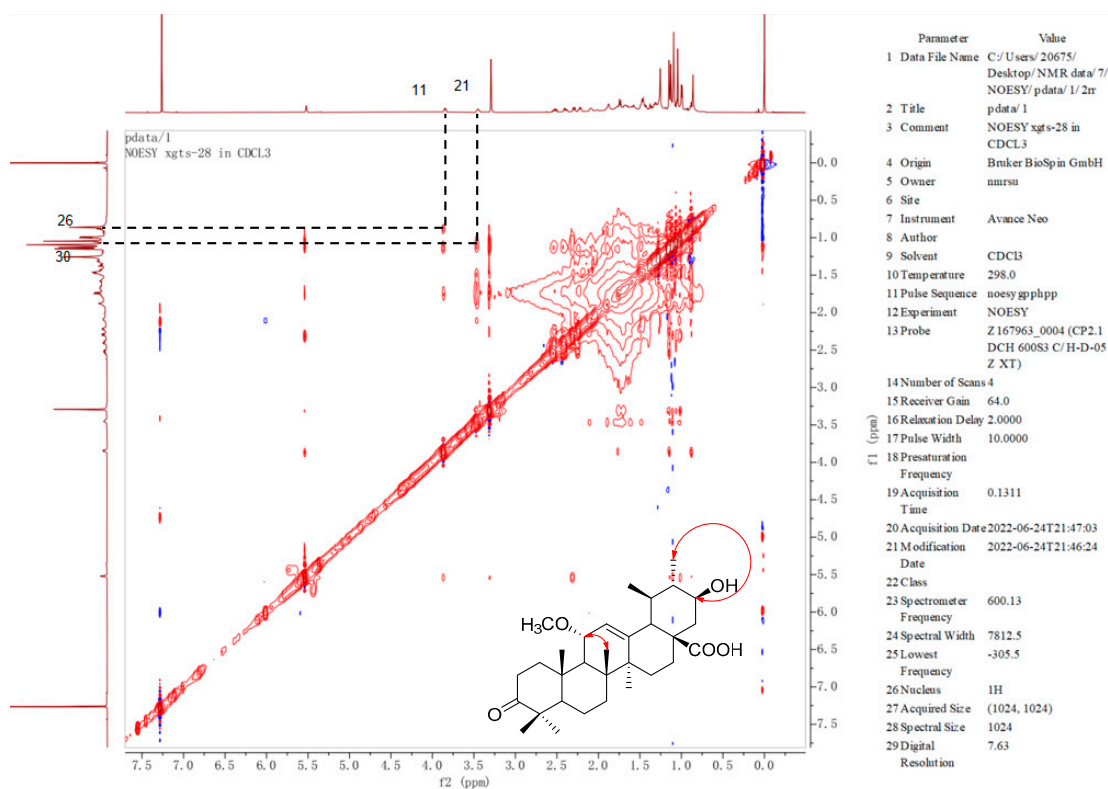

**Figure S23** NOESY spectrum (600 MHz) of compound 7 in CDCl<sub>3</sub>

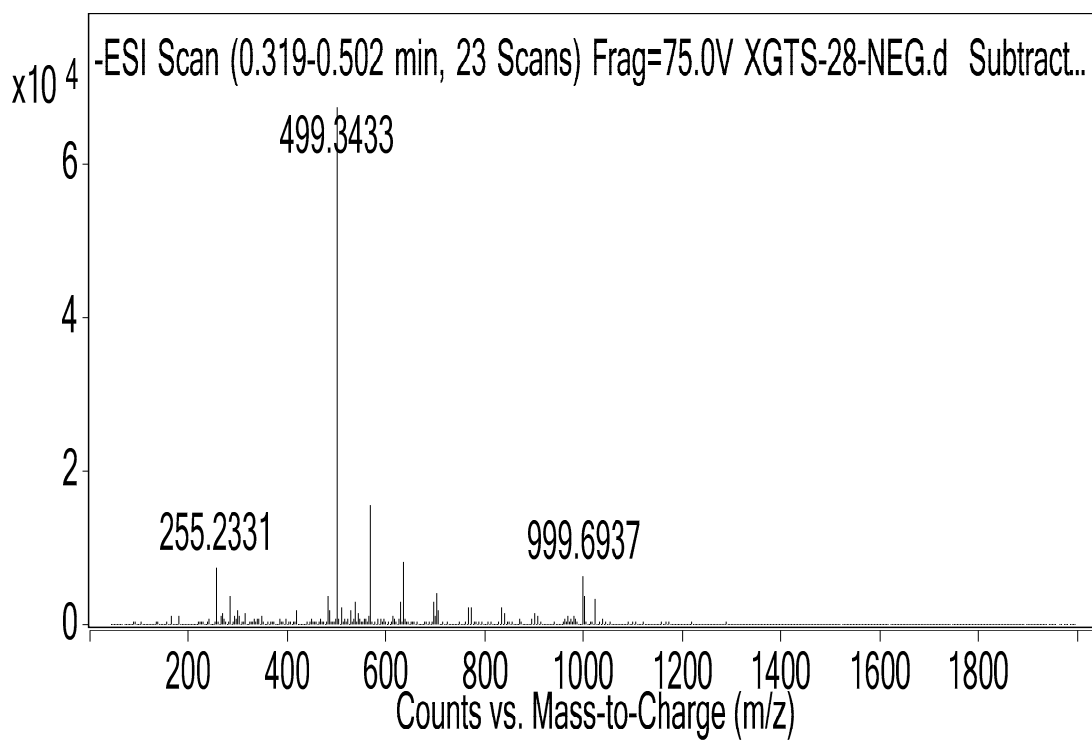

**Figure S24** HR-ESI-MS spectrum of compound 7



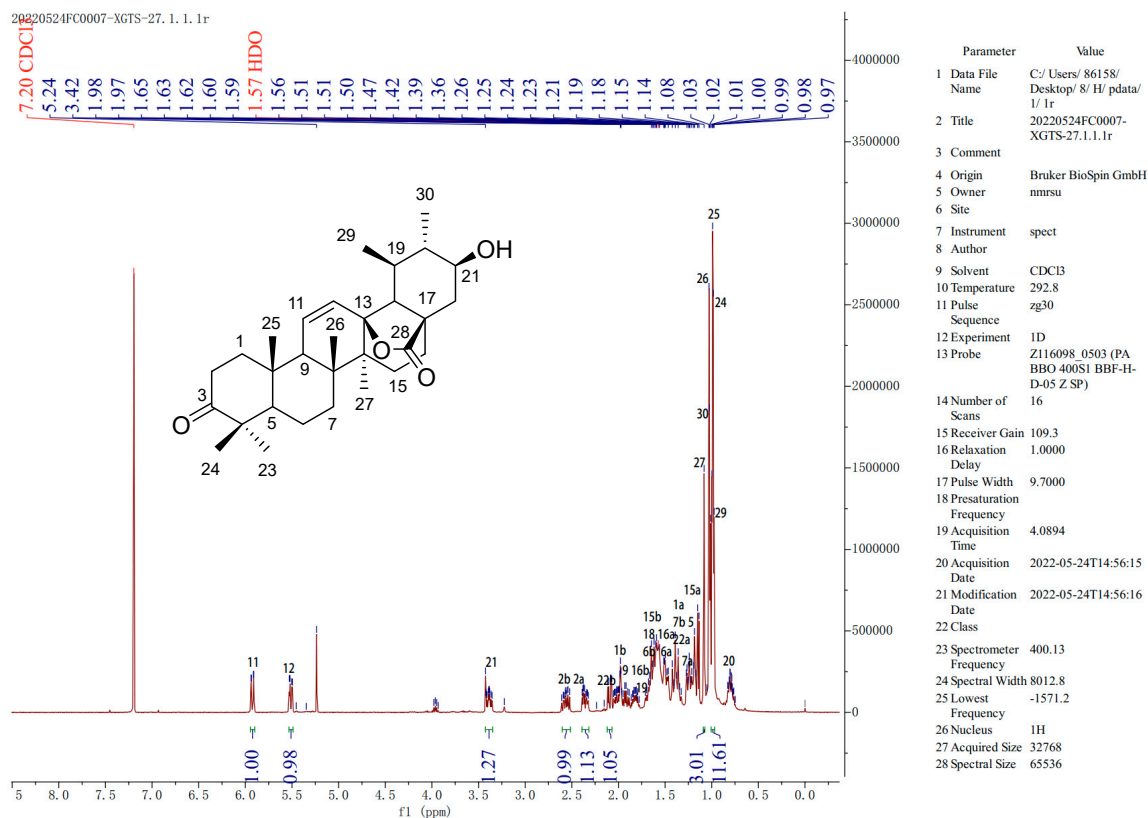

Figure S25  $^1\text{H}$  NMR spectrum (400 MHz) of compound **8** in  $\text{CDCl}_3$

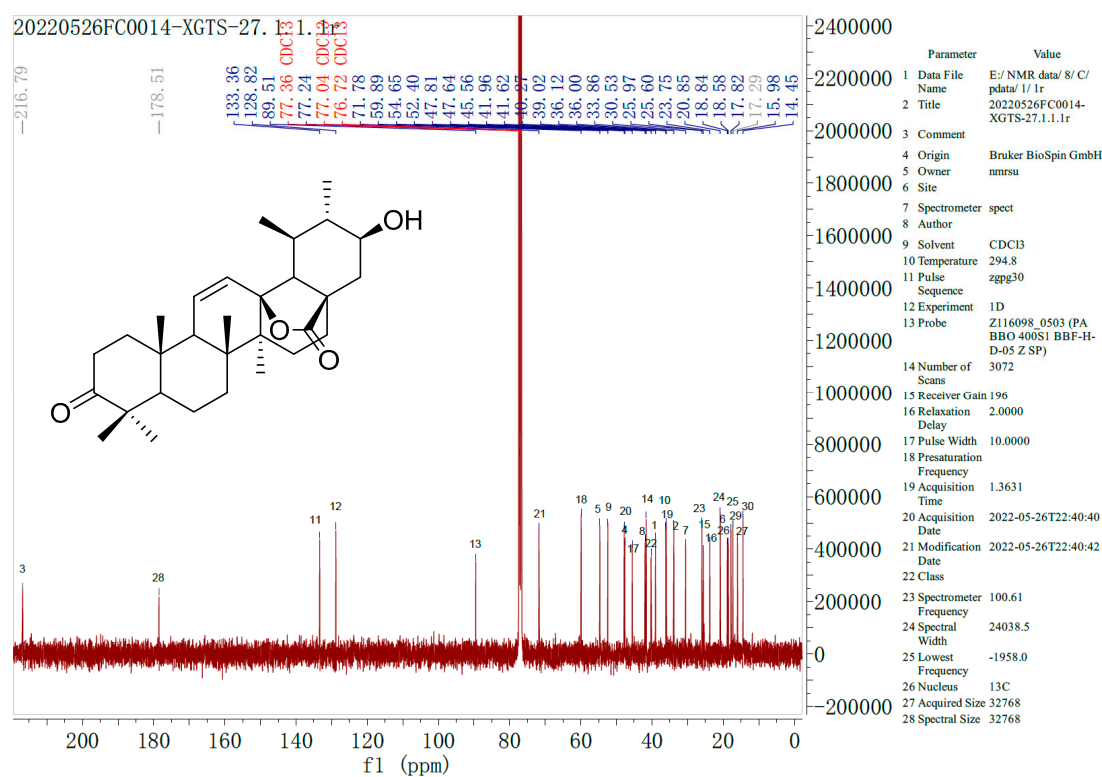

Figure S26  $^{13}\text{C}$  NMR spectrum (100 MHz) of compound **8** in  $\text{CDCl}_3$

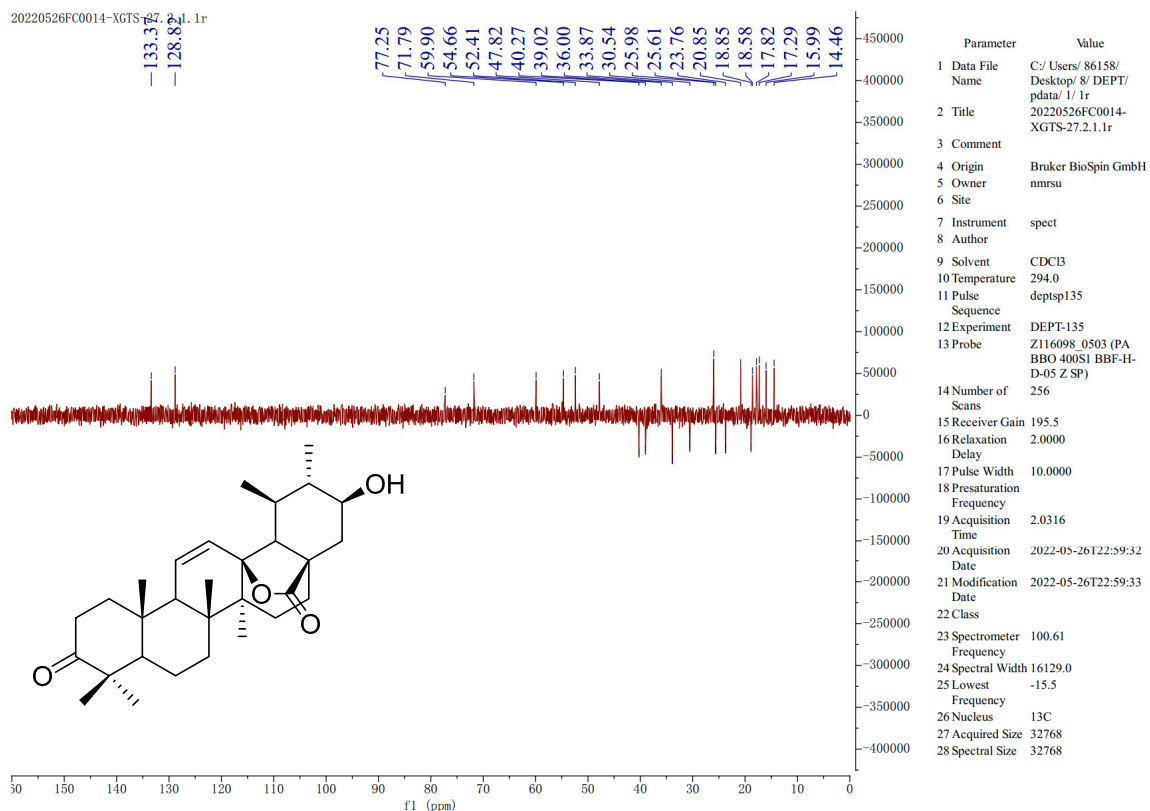

Figure S27 DEPT-135 spectrum (100 MHz) of compound **8** in CDCl<sub>3</sub>

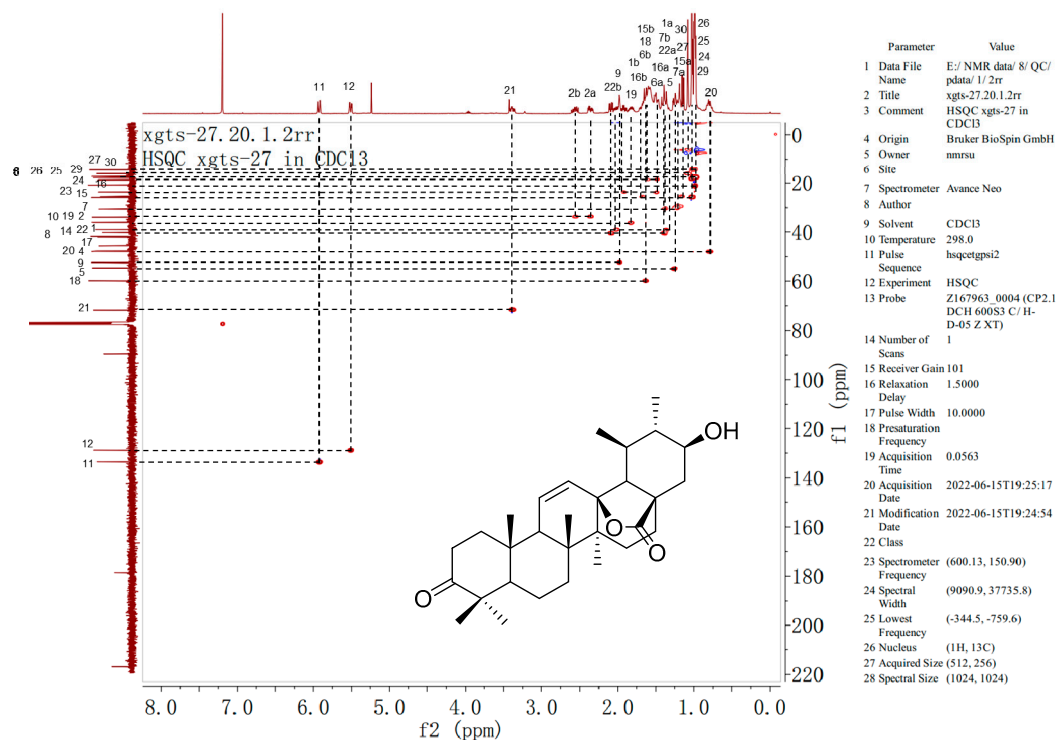

Figure S28 HSQC spectrum (100 MHz) of compound **8** in CDCl<sub>3</sub>

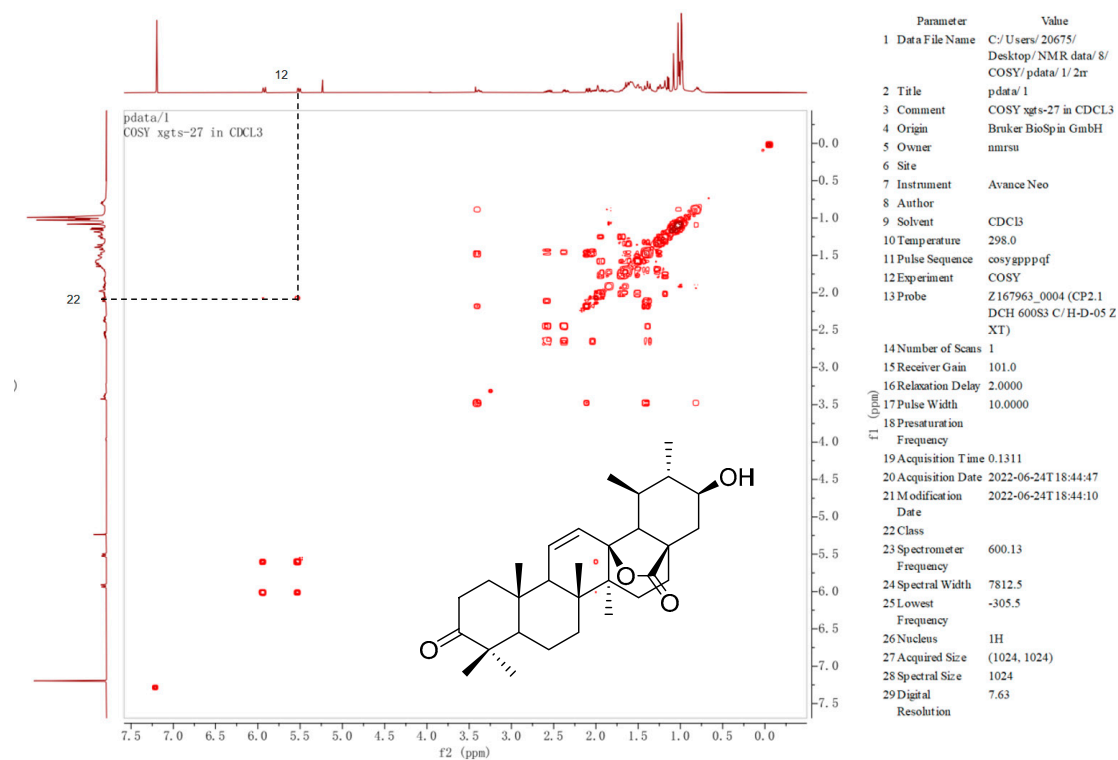

**Figure S29**  $^1\text{H}$ - $^1\text{H}$  COSY spectrum (400 MHz) of compound **8** in  $\text{CDCl}_3$

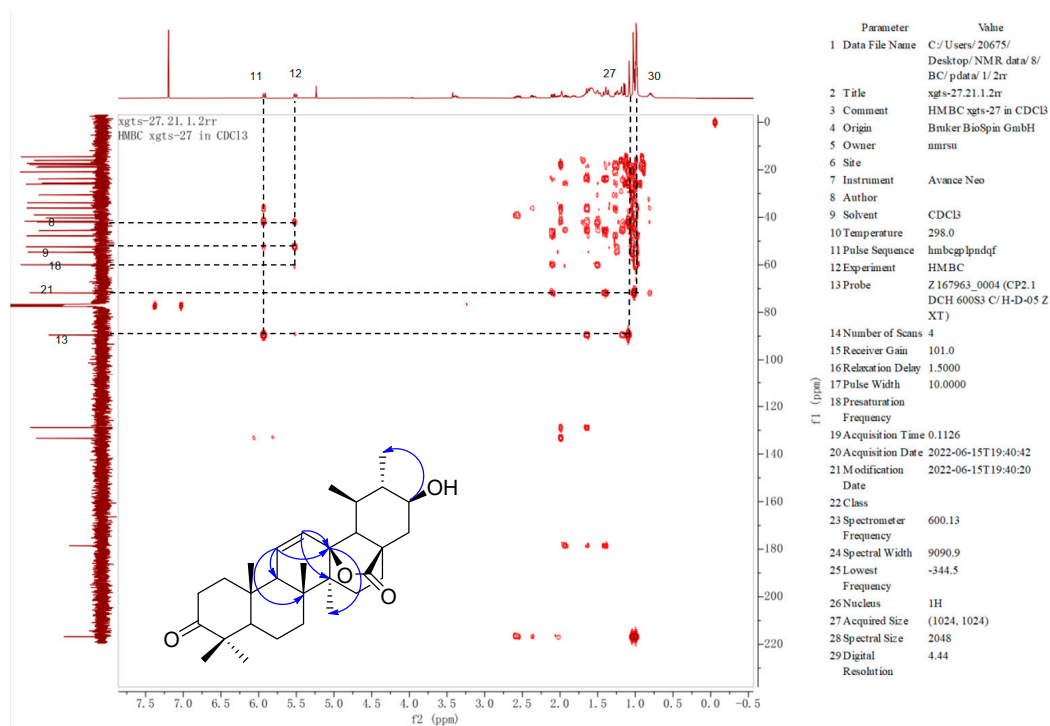

**Figure S30** HMBC spectrum (100 MHz) of compound **8** in  $\text{CDCl}_3$

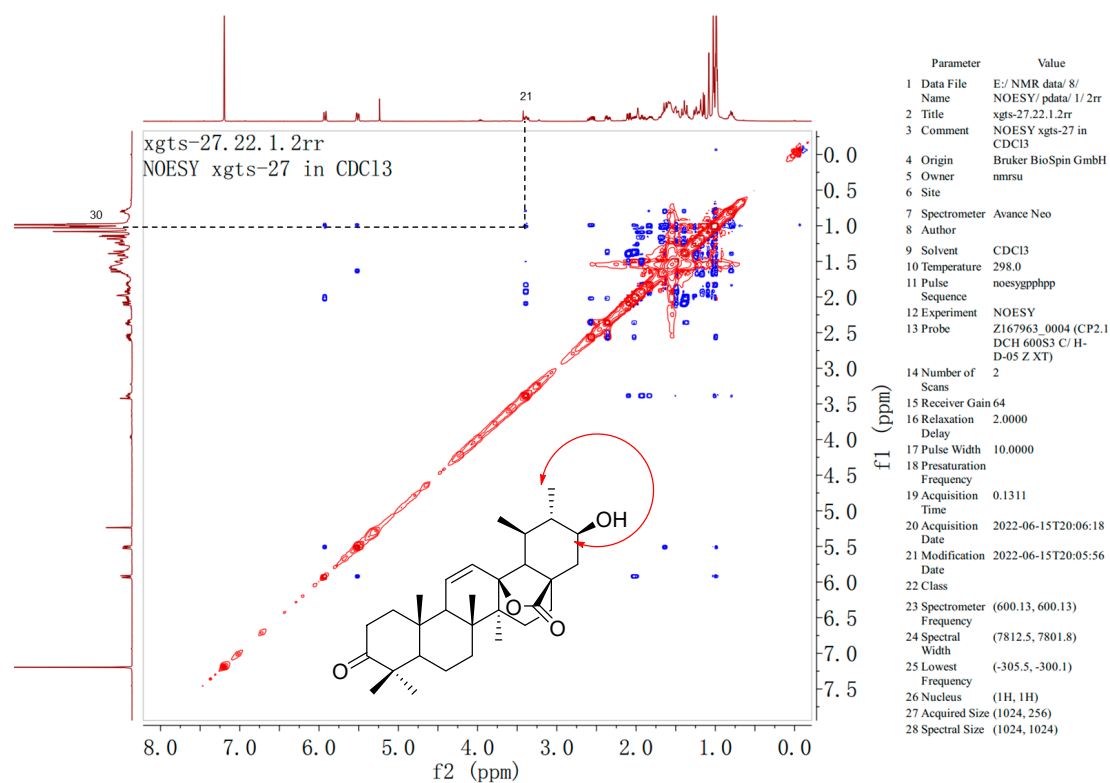

**Figure S31** NOESY spectrum (400 MHz) of compound **8** in CDCl<sub>3</sub>

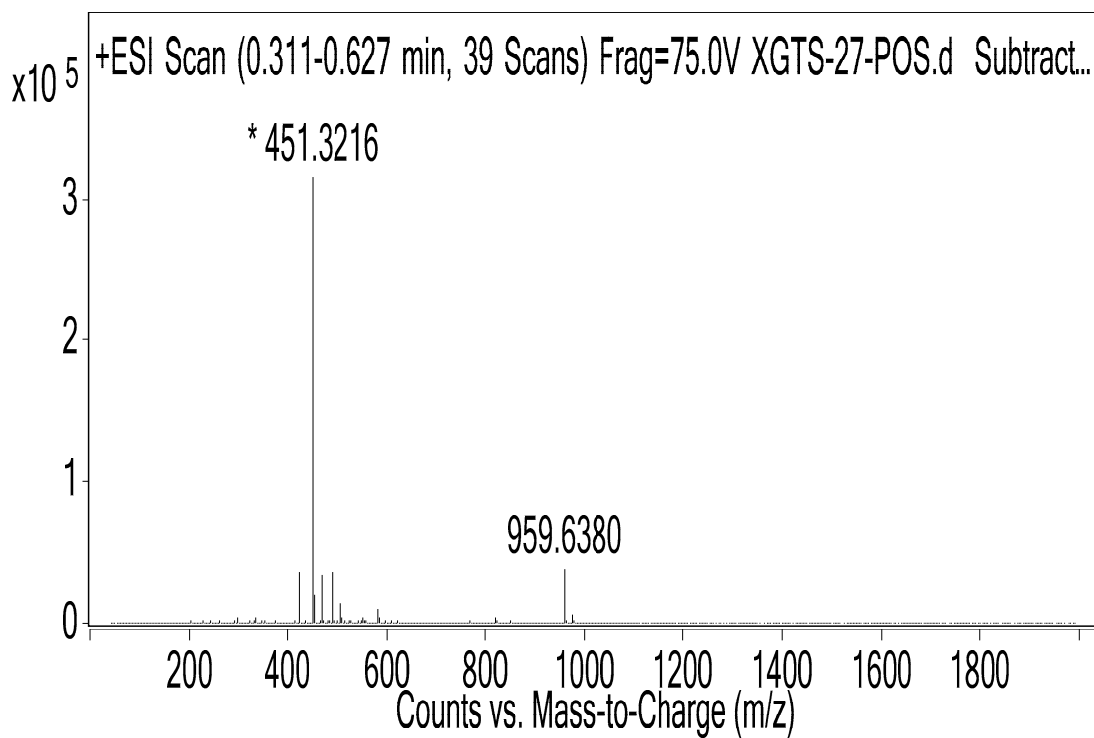

**Figure S32** HR-ESI-MS spectrum of compound **8**

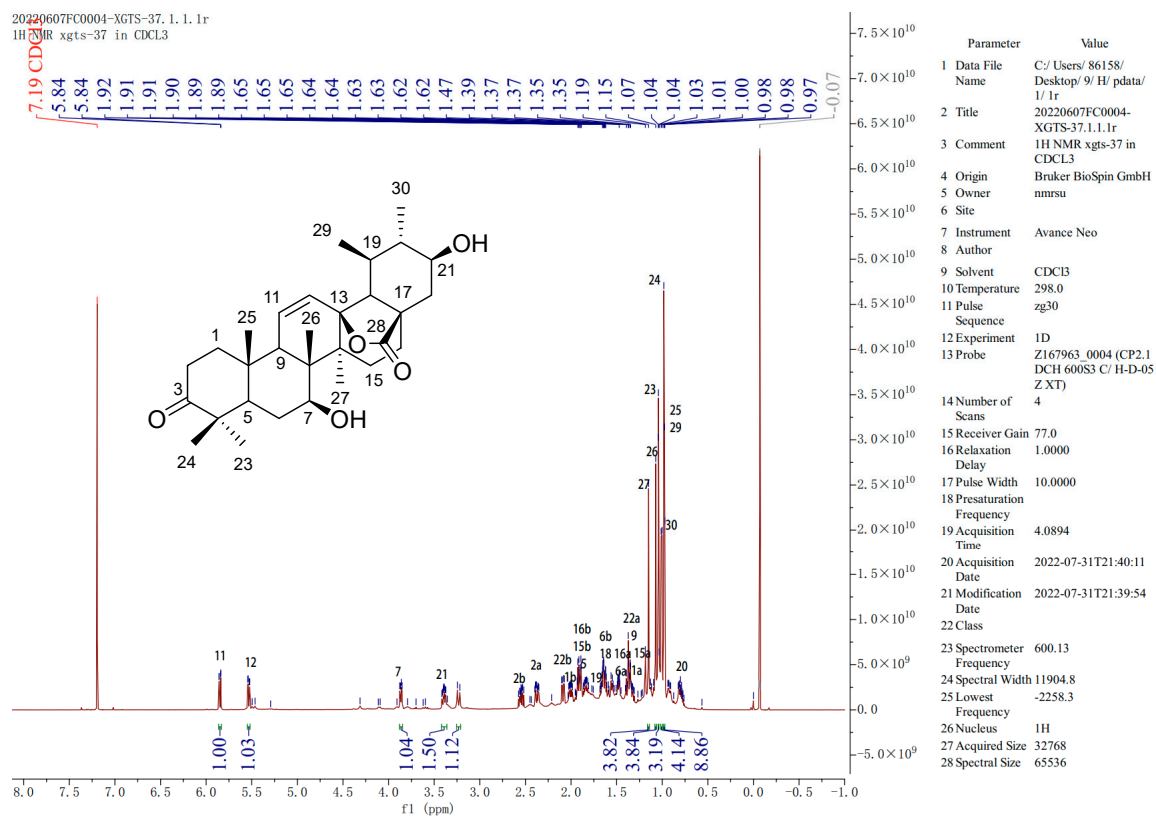

Figure S33 <sup>1</sup>H NMR spectrum (400 MHz) of compound **9** in CDCl<sub>3</sub>

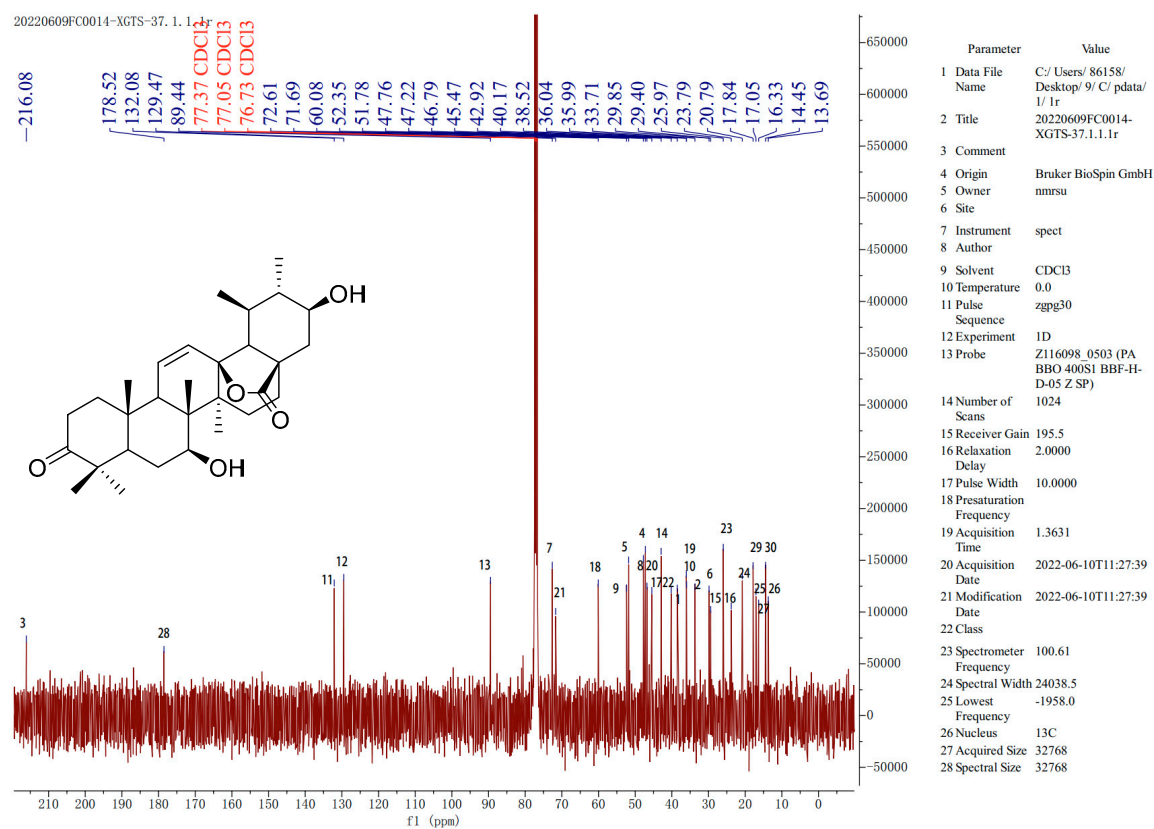

Figure S34 <sup>13</sup>C NMR spectrum (100 MHz) of compound **9** in CDCl<sub>3</sub>

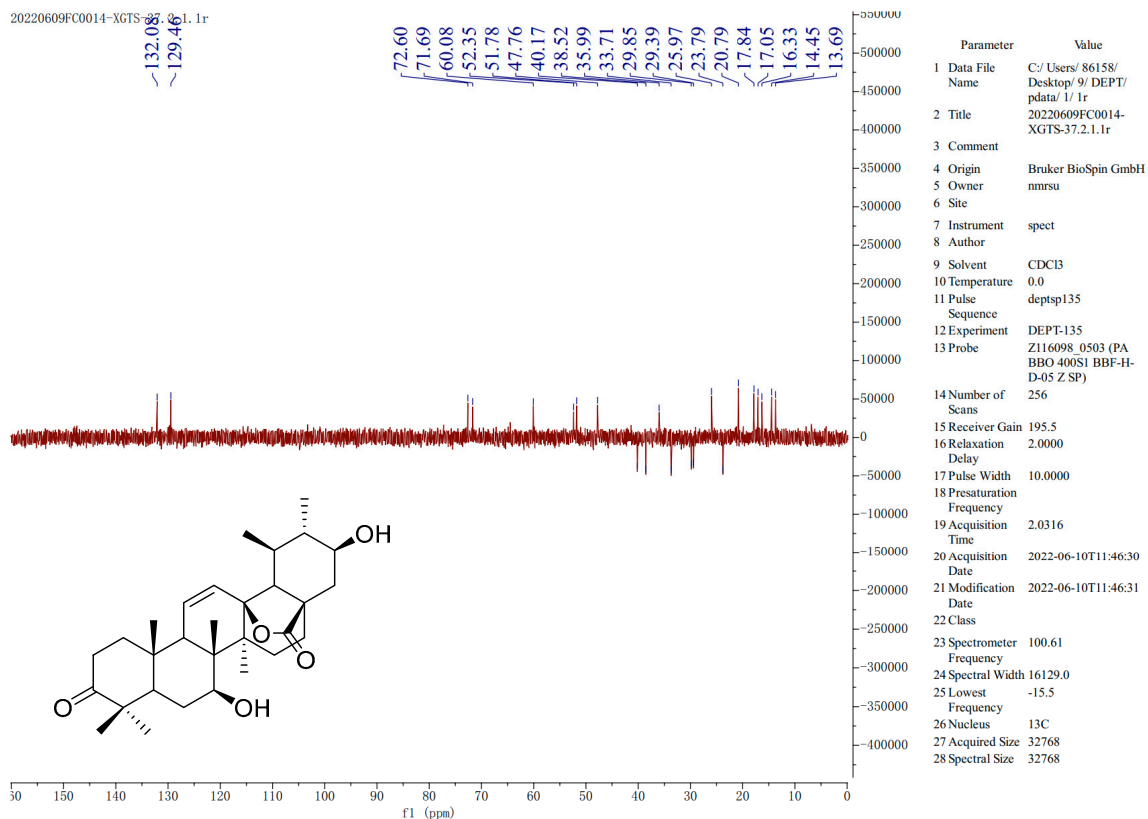

Figure S35 DEPT-135 spectrum (100 MHz) of compound 9 in CDCl<sub>3</sub>

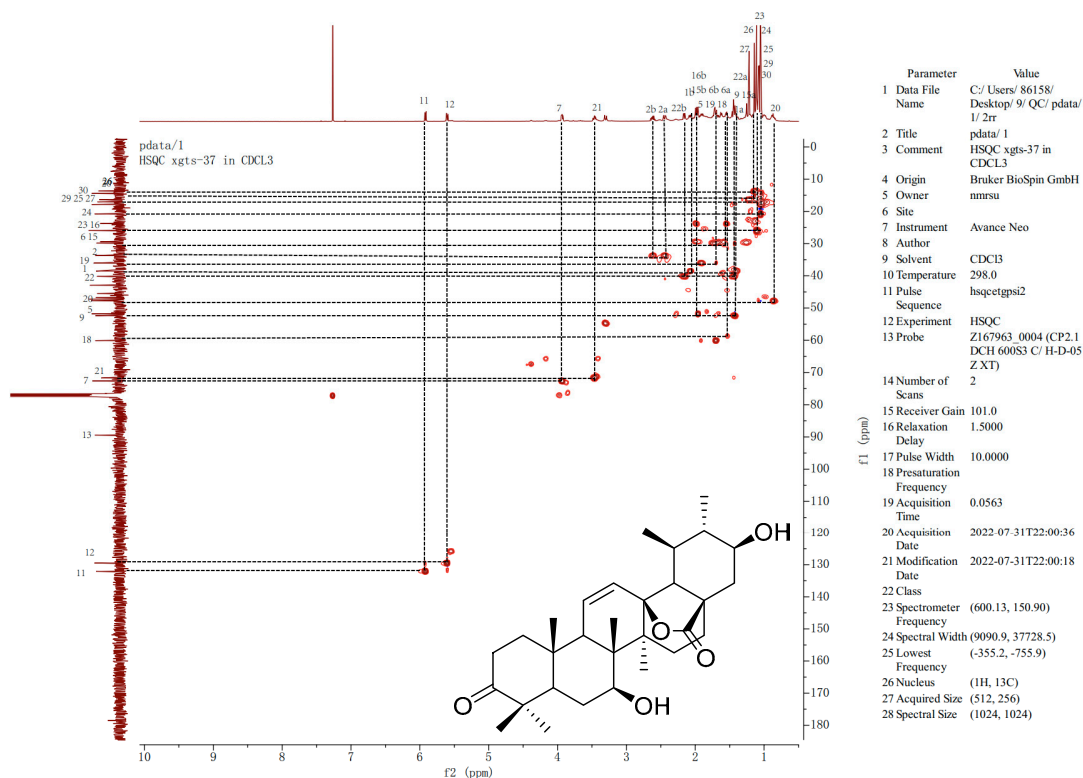

Figure S36 HSQC spectrum (100 MHz) of compound 9 in CDCl<sub>3</sub>



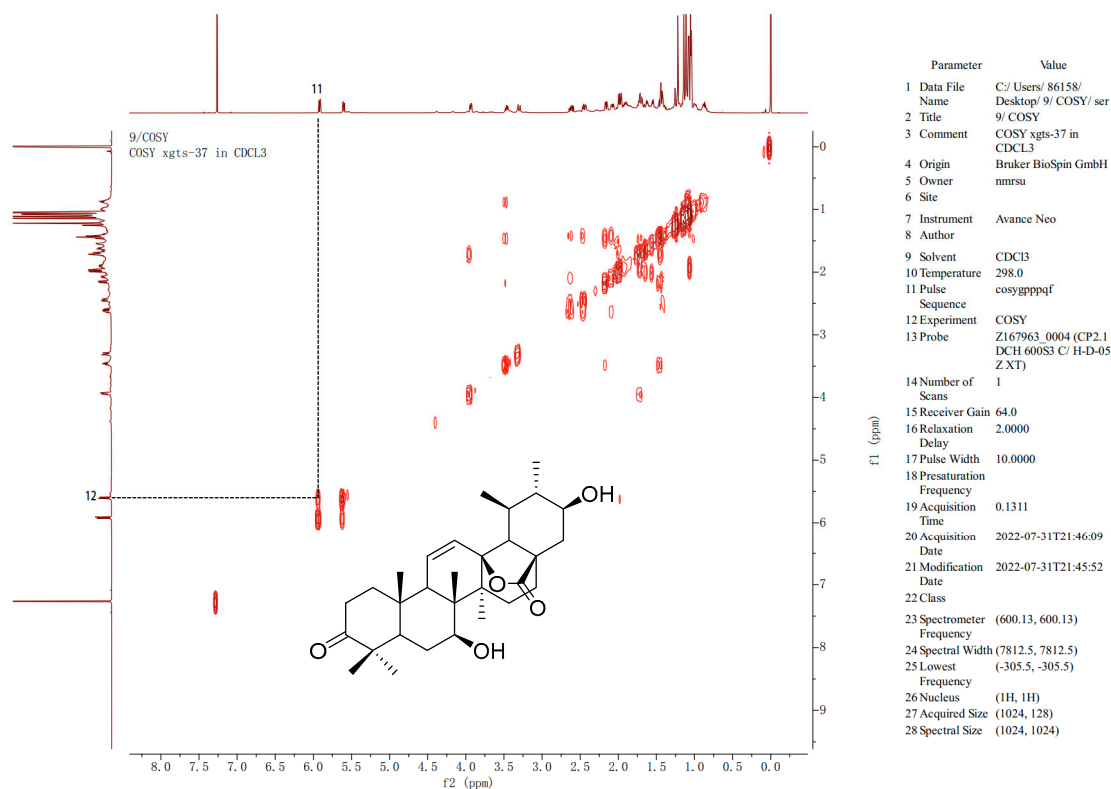

**Figure S37**  $^1\text{H}$ - $^1\text{H}$  COSY spectrum (400 MHz) of compound **9** in  $\text{CDCl}_3$

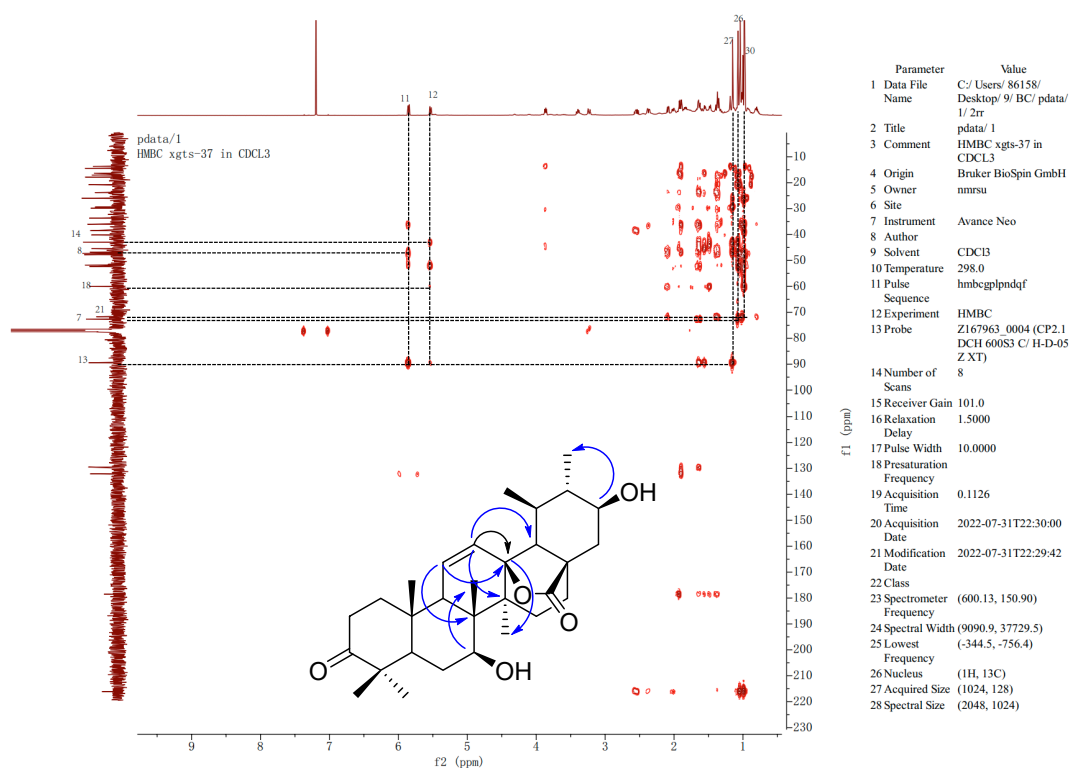

**Figure S38** HMBC spectrum (100 MHz) of compound **9** in  $\text{CDCl}_3$

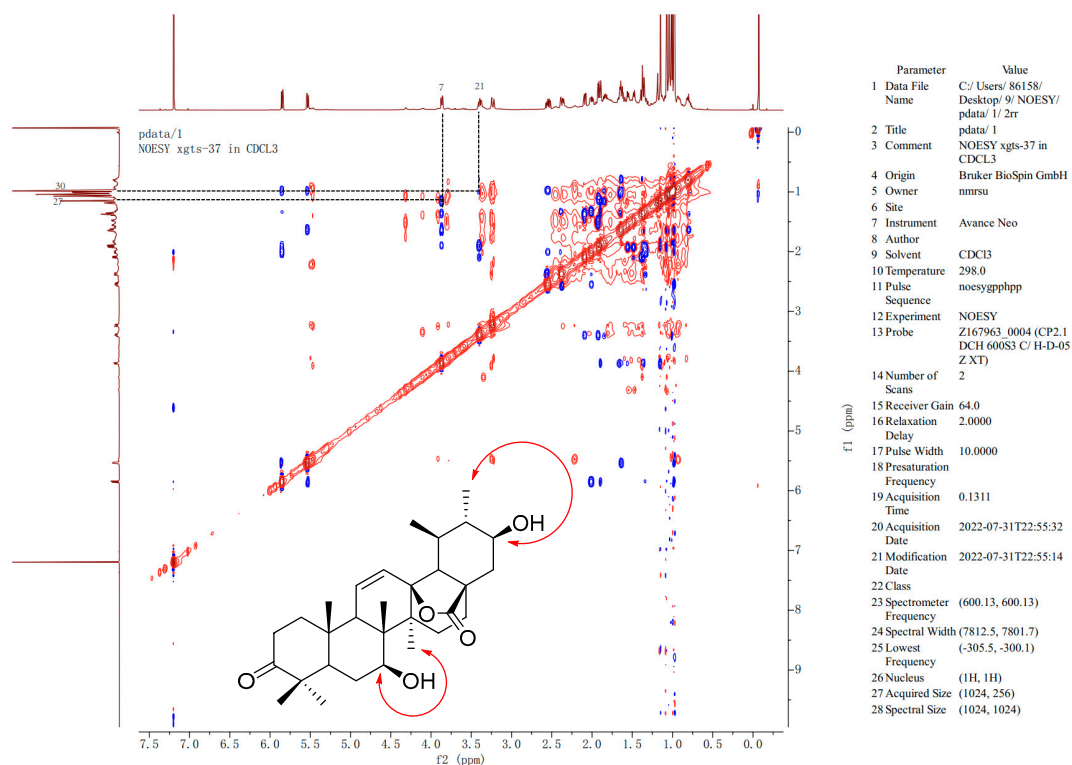

**Figure S39** NOESY spectrum (400 MHz) of compound **9** in CDCl<sub>3</sub>

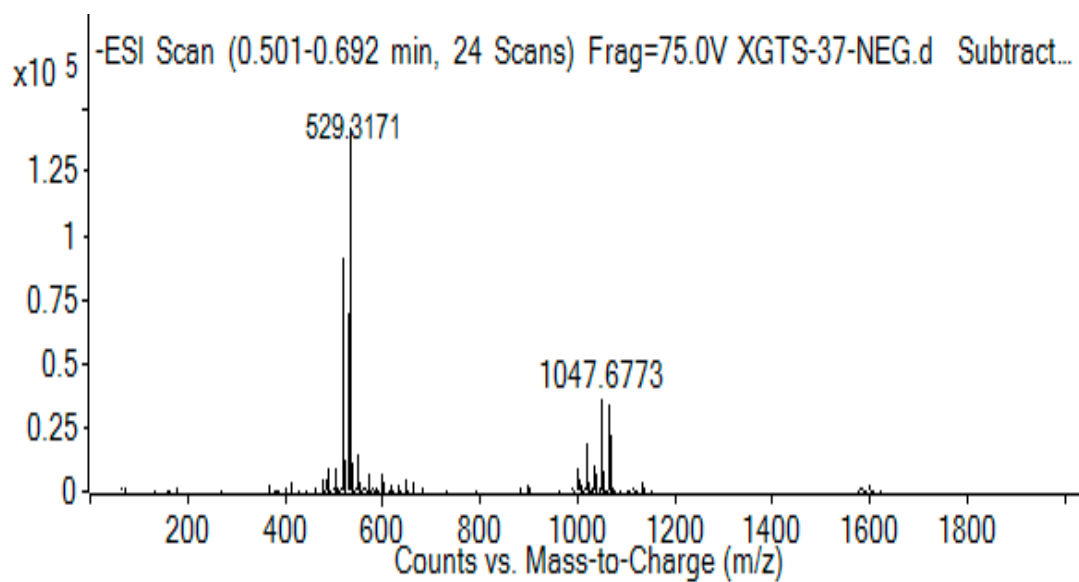

**Figure S40** HR-ESI-MS spectrum of compound **9**



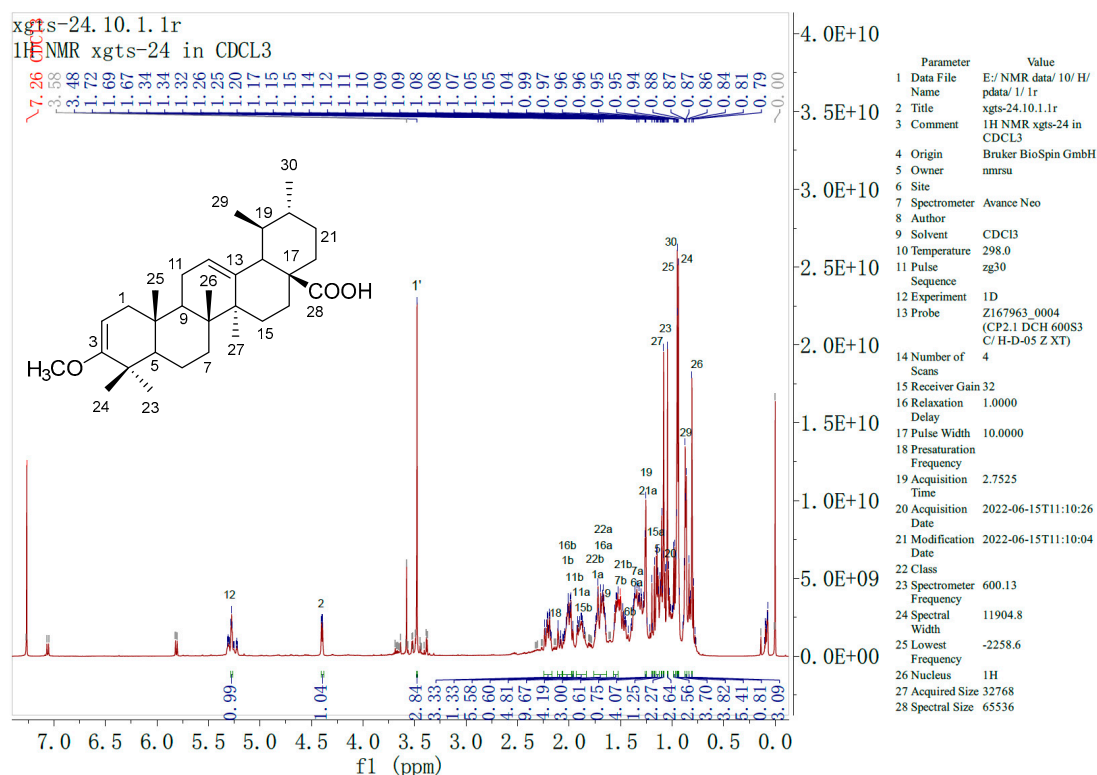

Figure S41 <sup>1</sup>H NMR spectrum (400 MHz) of compound **10** in CDCl<sub>3</sub>

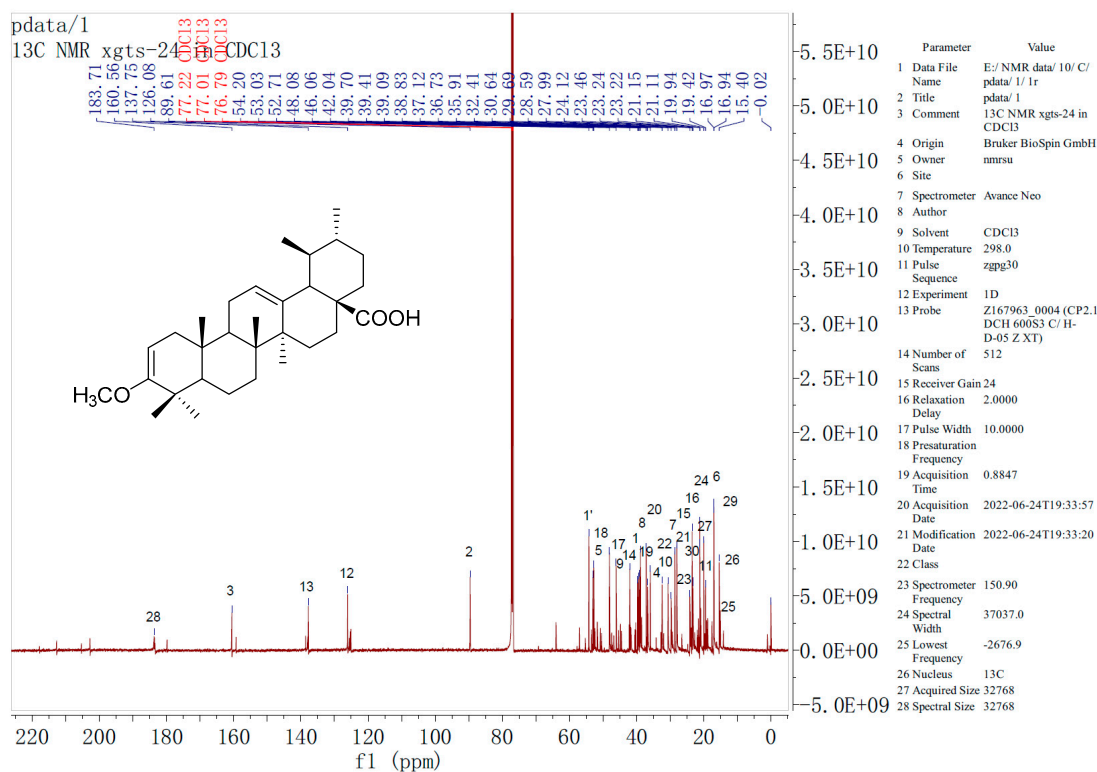

Figure S42 <sup>13</sup>C NMR spectrum (100 MHz) of compound **10** in CDCl<sub>3</sub>

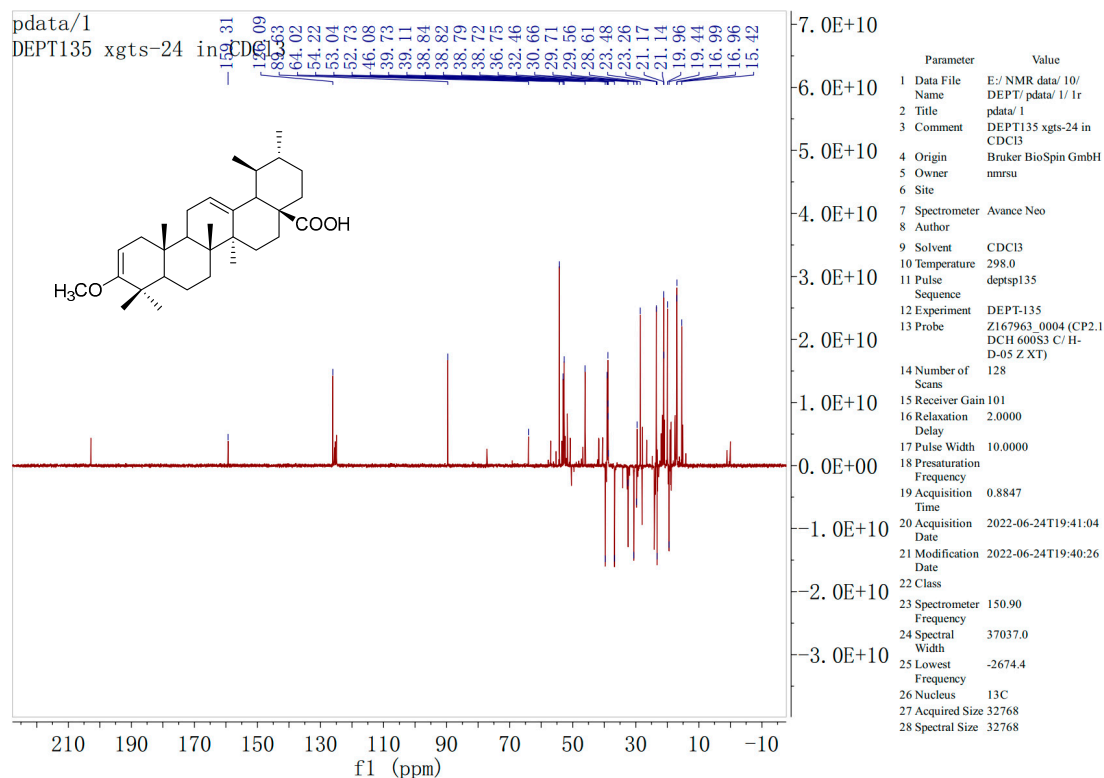

Figure S43 DEPT-135 spectrum (100 MHz) of compound **10** in CDCl<sub>3</sub>

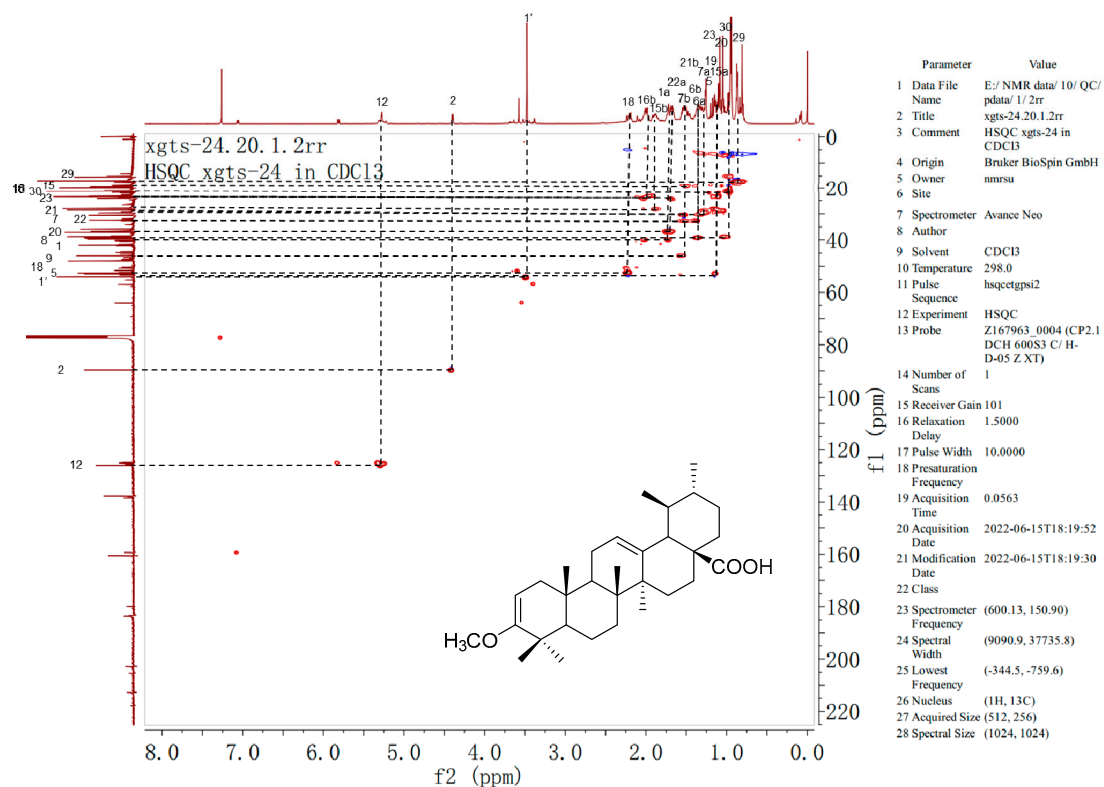

Figure S44 HSQC spectrum (100 MHz) of compound **10** in CDCl<sub>3</sub>

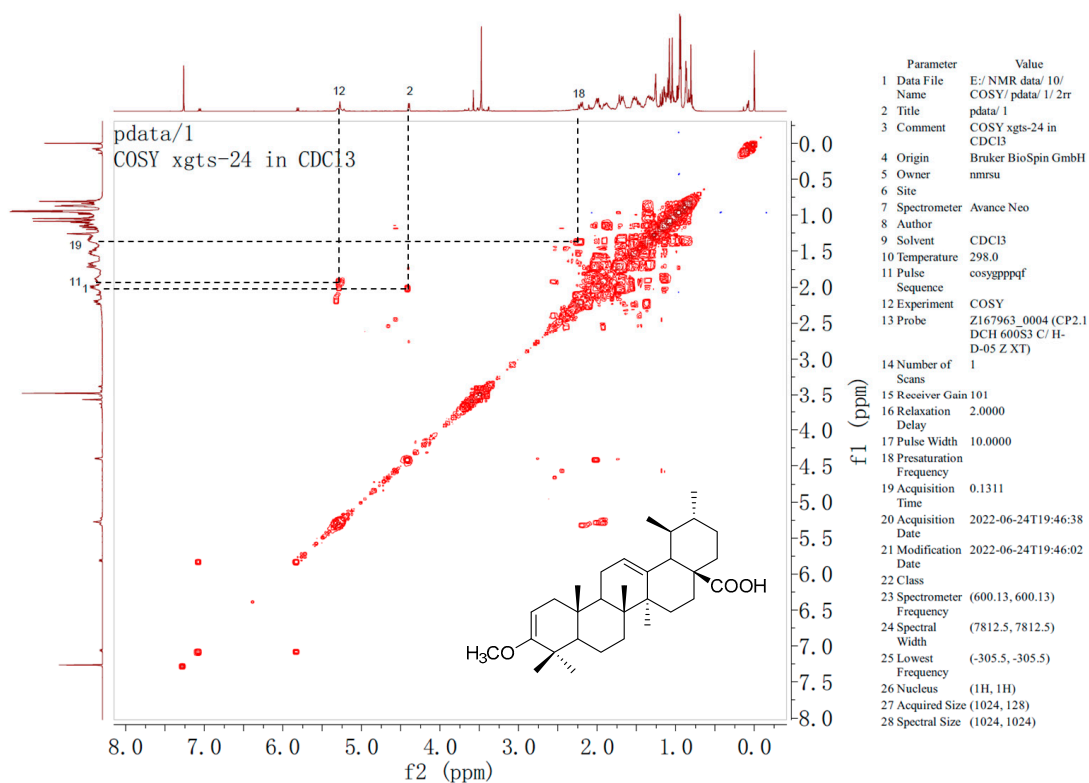

**Figure S45** <sup>1</sup>H-<sup>1</sup>H COSY spectrum (400 MHz) of compound **10** in CDCl<sub>3</sub>

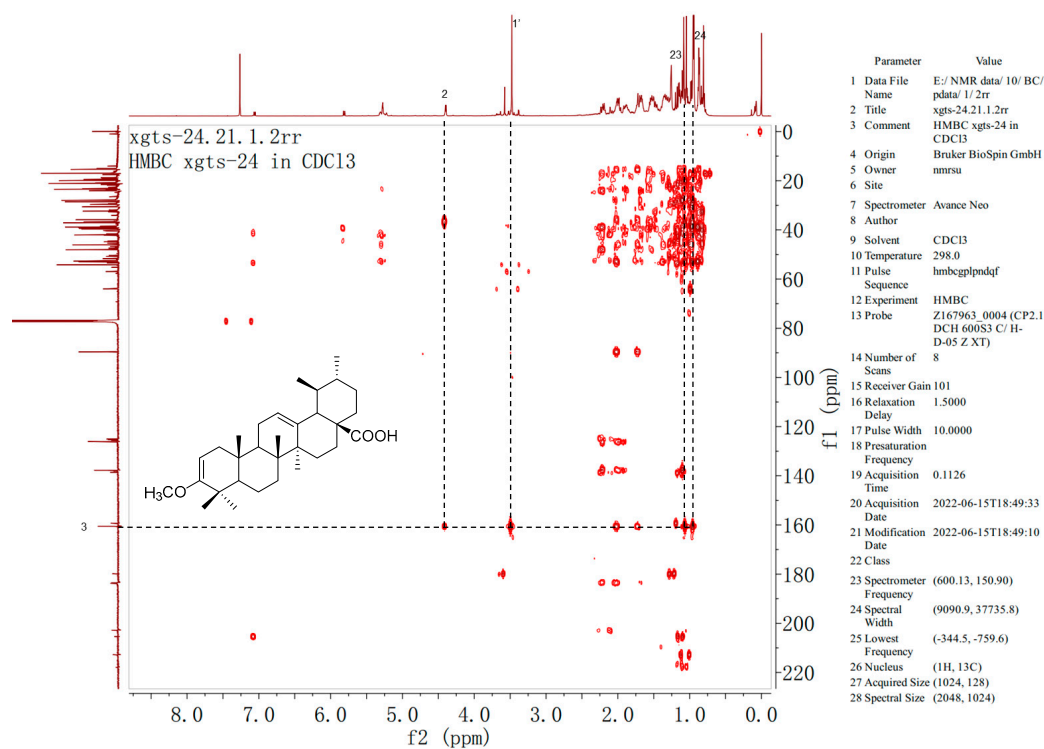

**Figure S46** HMBC spectrum (100 MHz) of compound **10** in CDCl<sub>3</sub>

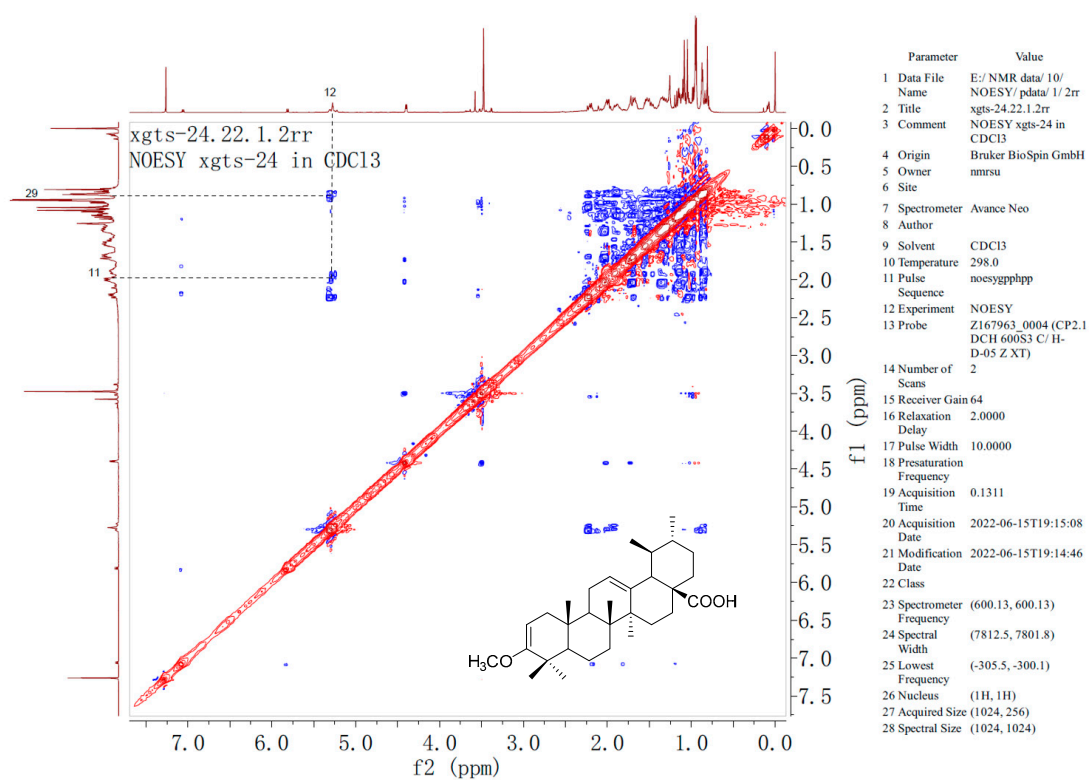

**Figure S47** NOESY spectrum (400 MHz) of compound **10** in CDCl<sub>3</sub>

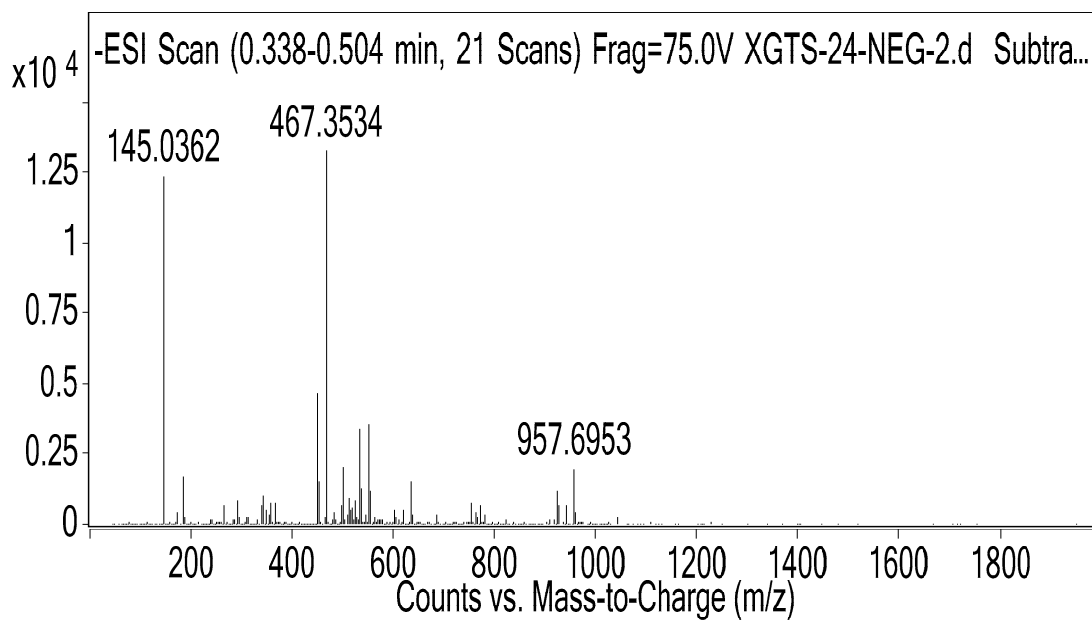

**Figure S48** HR-ESI-MS spectrum of compound **10**





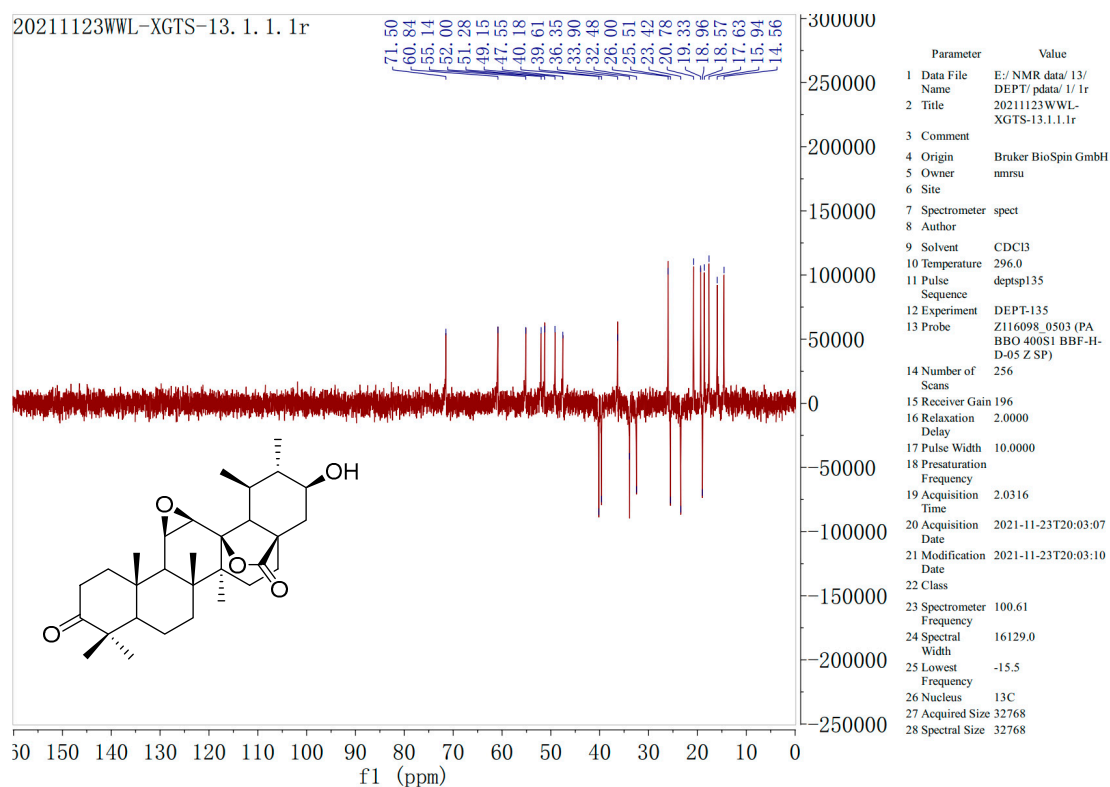

Figure S51 DEPT-135 spectrum (100 MHz) of compound **13** in CDCl<sub>3</sub>

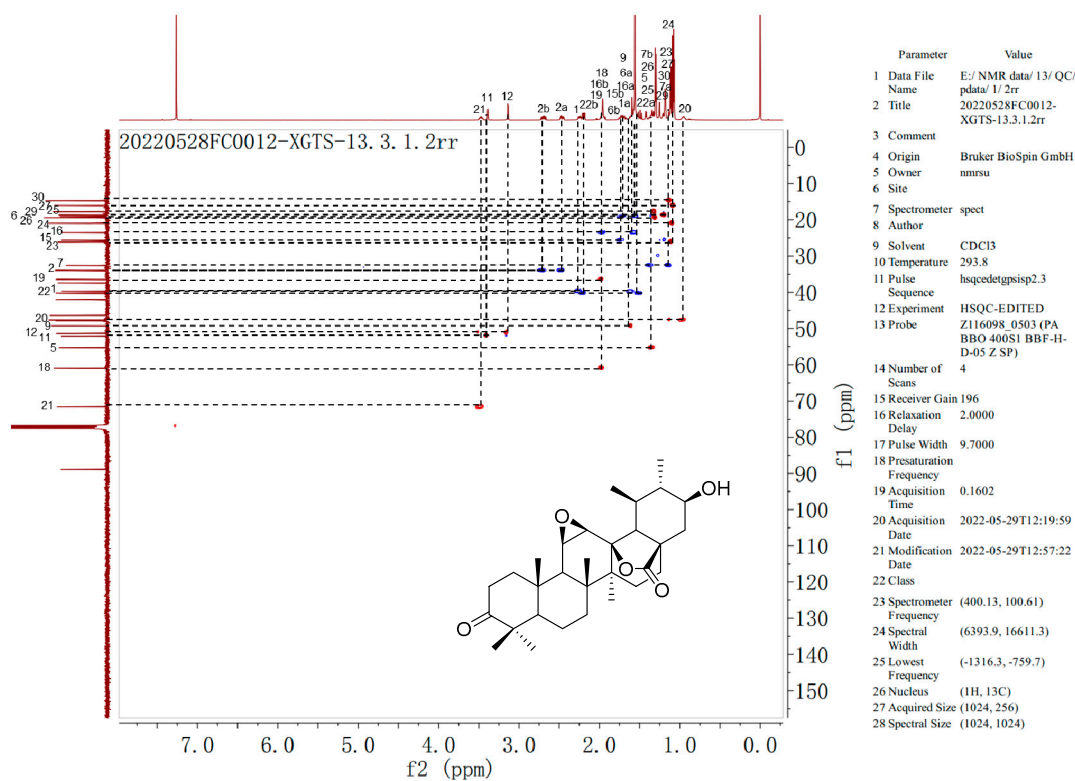

Figure S52 HSQC spectrum (100 MHz) of compound **13** in CDCl<sub>3</sub>

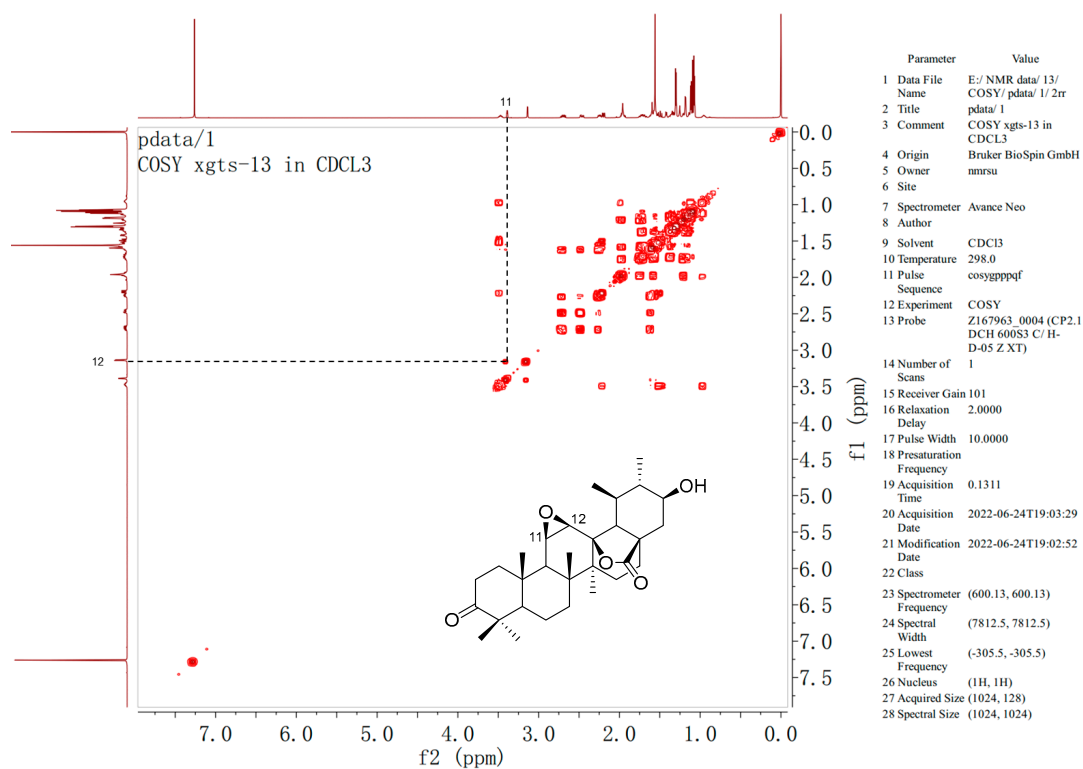

Figure S53  $^1\text{H}$ - $^1\text{H}$  COSY spectrum (400 MHz) of compound **13** in  $\text{CDCl}_3$

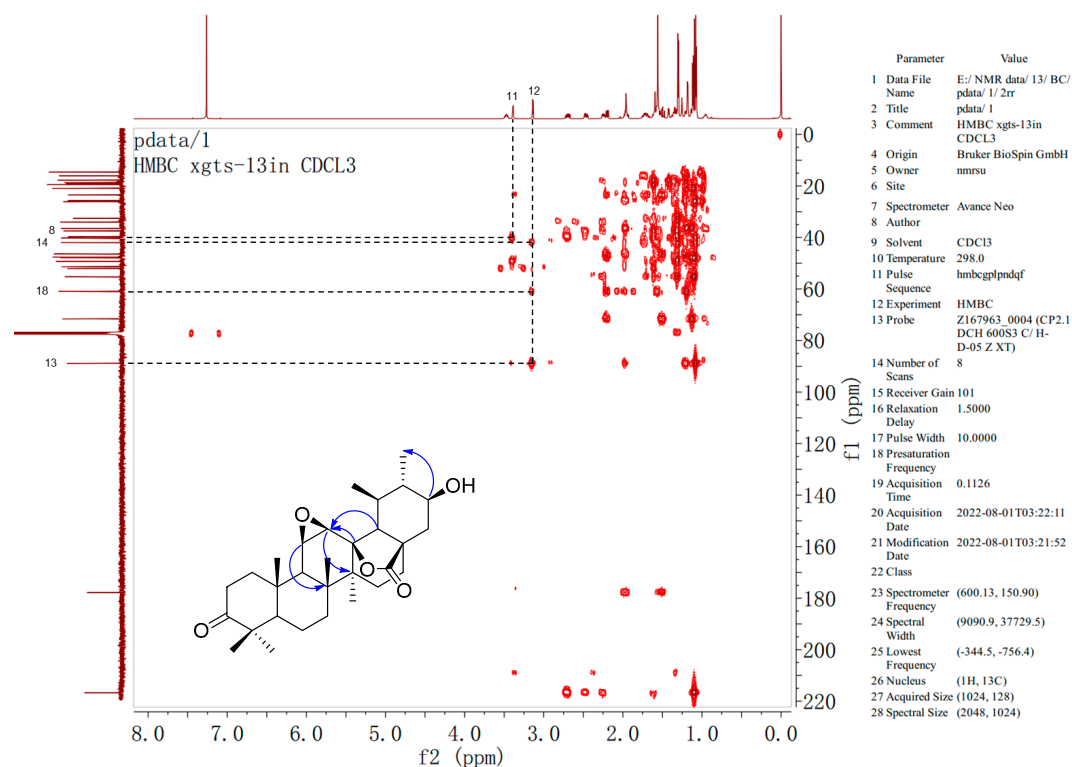

Figure S54 HMBC spectrum (100 MHz) of compound **13** in  $\text{CDCl}_3$

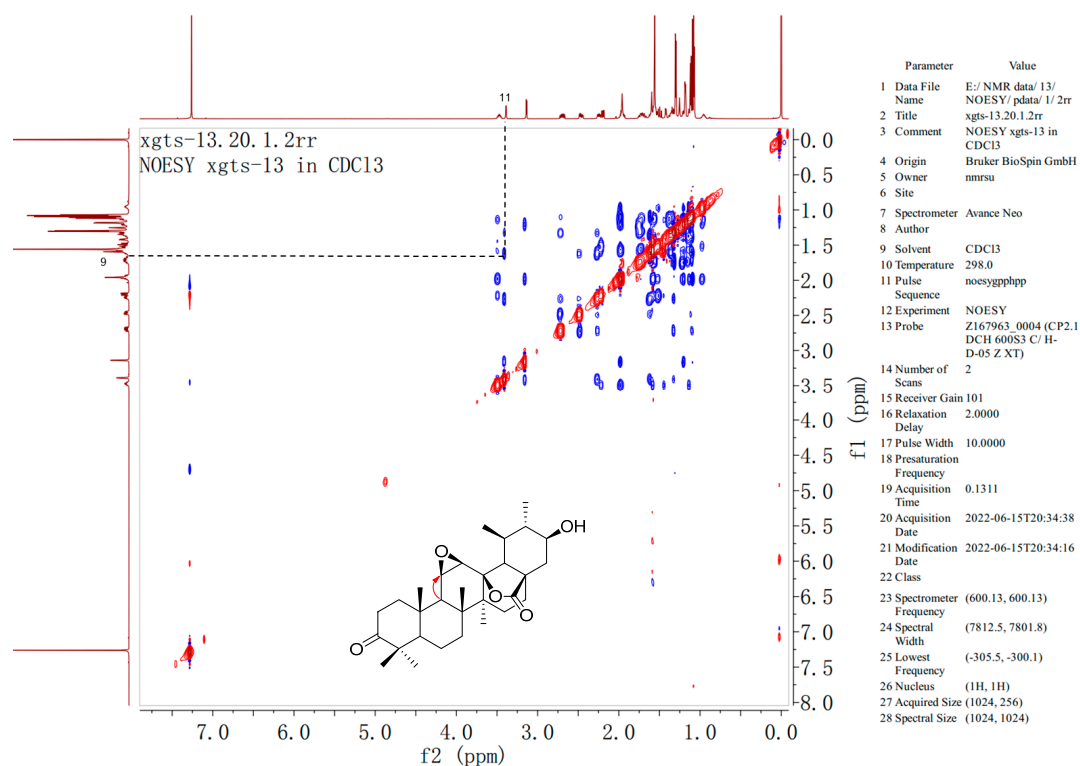

**Figure S55** NOESY spectrum (400 MHz) of compound 13 in CDCl<sub>3</sub>

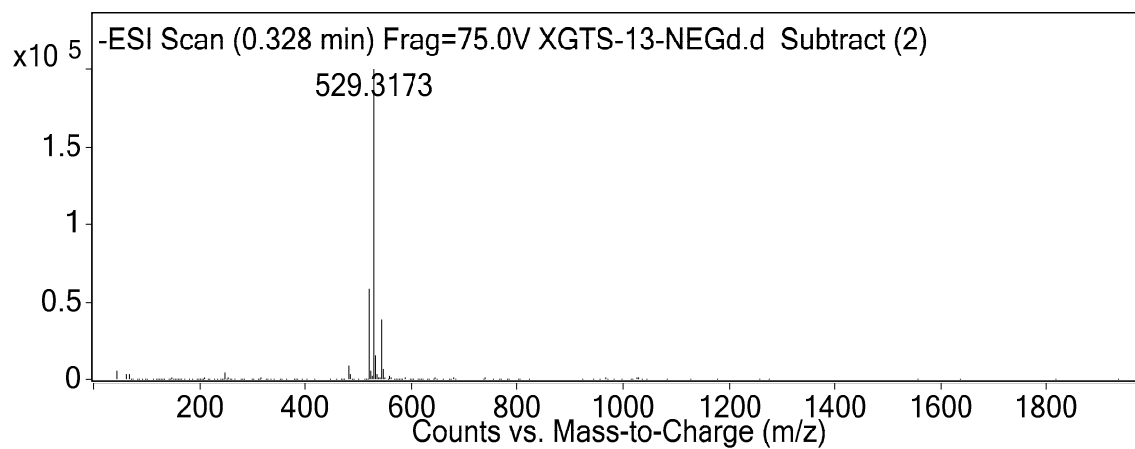

**Figure S56** HR-ESI-MS spectrum of compound 13



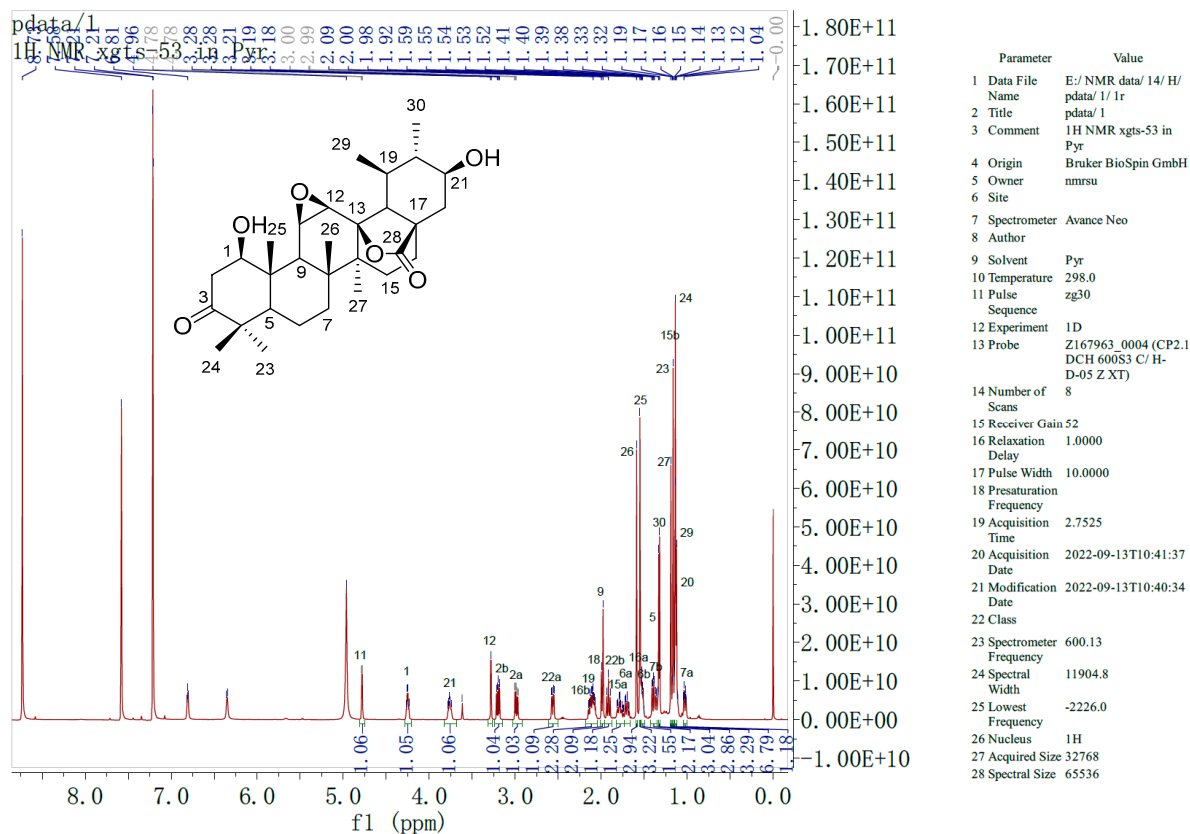

**Figure S57**  $^1\text{H}$  NMR spectrum (600 MHz) of compound **14** in Pyridine- $d_5$

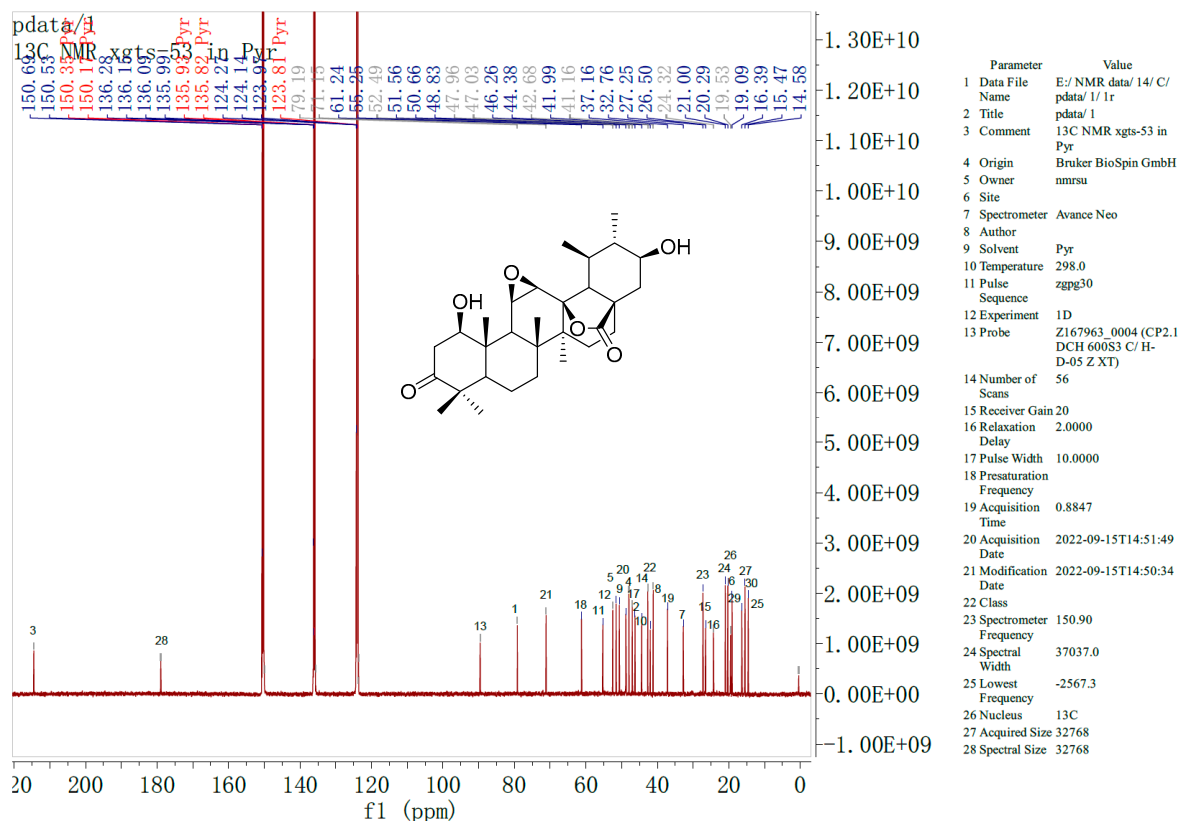

**Figure S58**  $^{13}\text{C}$  NMR spectrum (150 MHz) of compound **14** in Pyridine- $d_5$

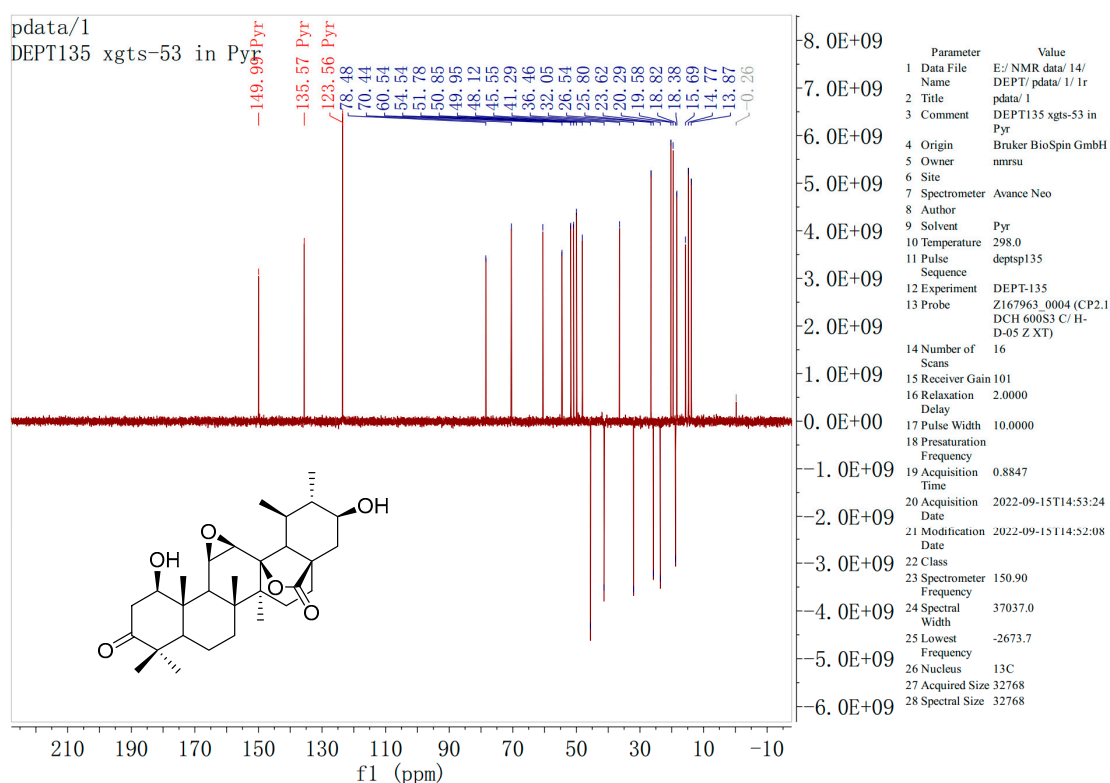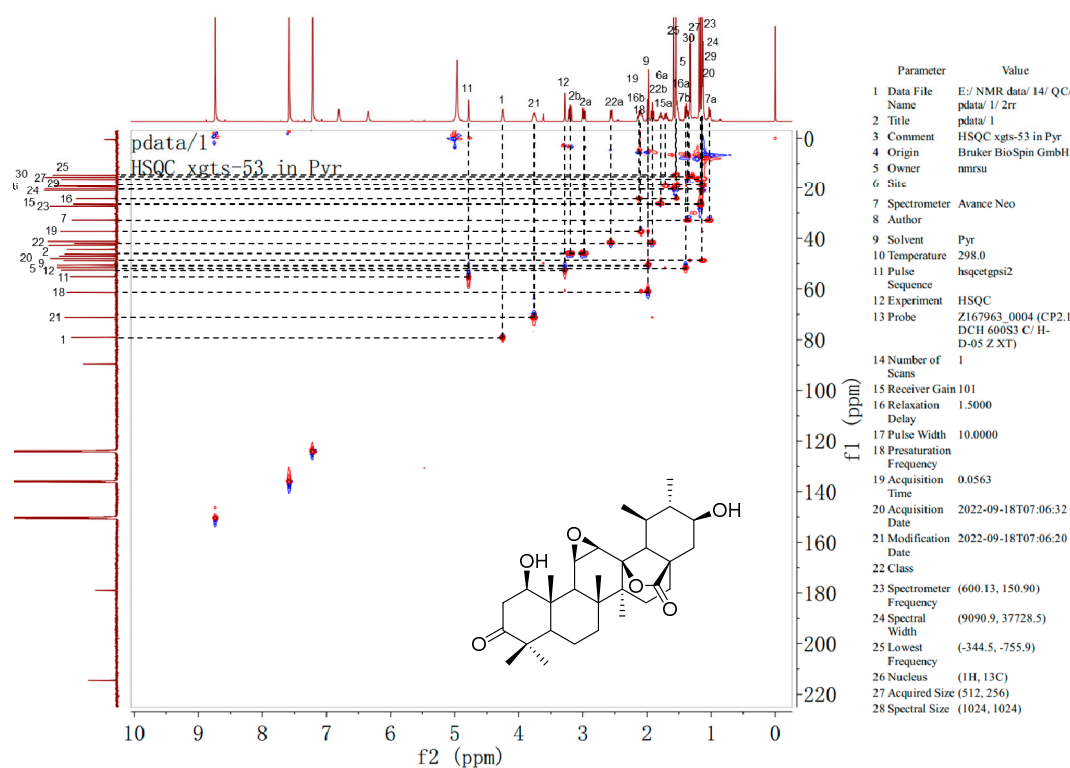

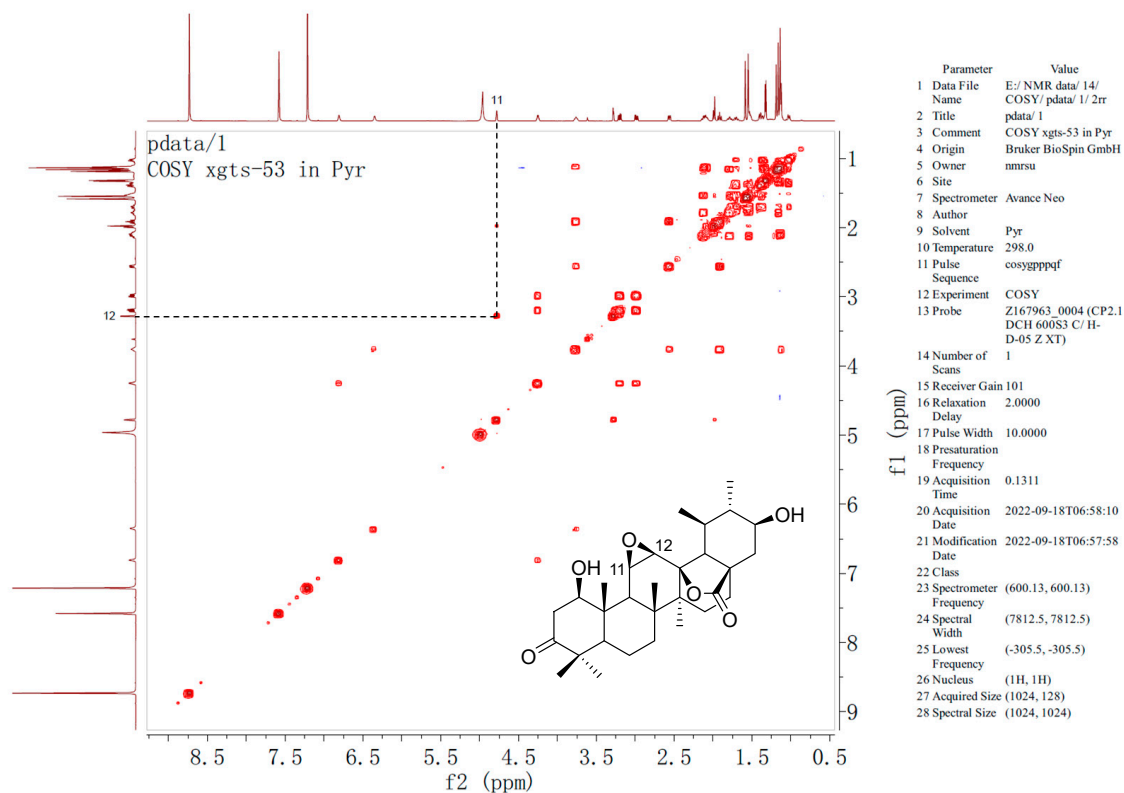

**Figure S61**  $^1\text{H}$ - $^1\text{H}$  COSY spectrum (600 MHz) of compound **14** in Pyridine- $d_5$

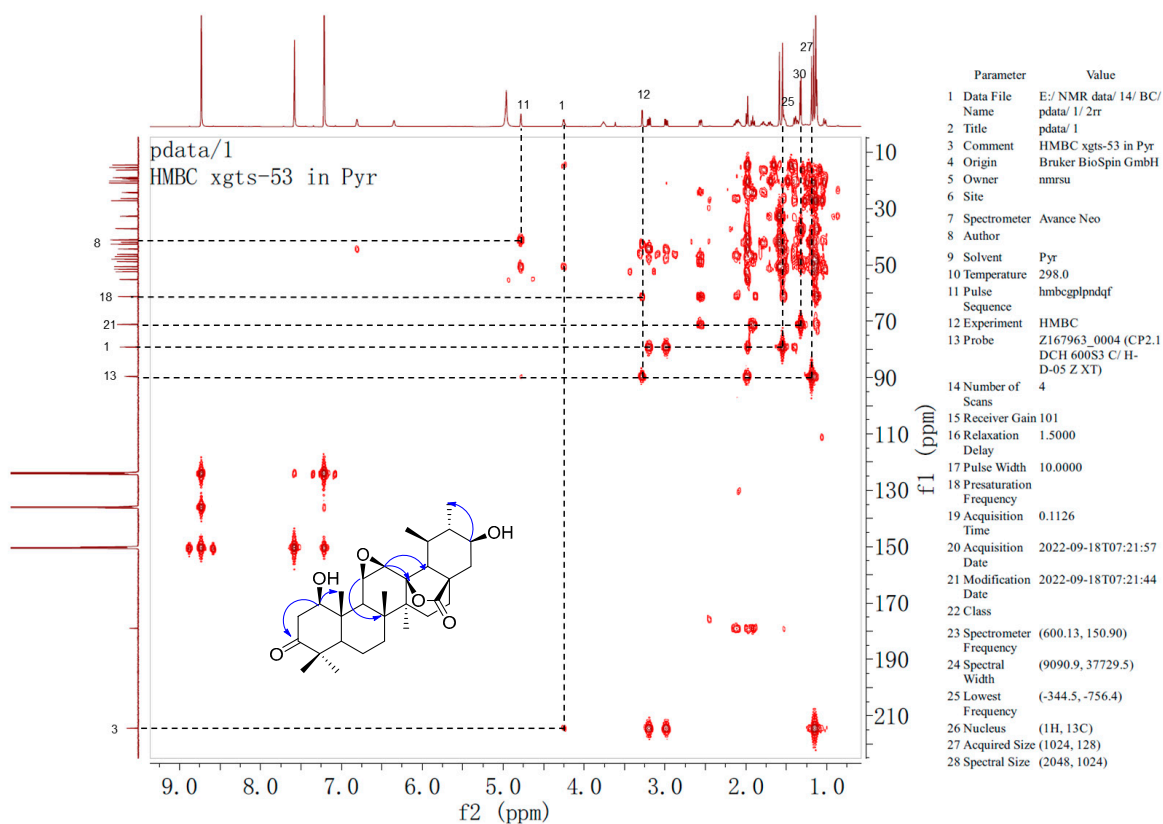

**Figure S62** HMBC spectrum (150 MHz) of compound **14** in Pyridine- $d_5$

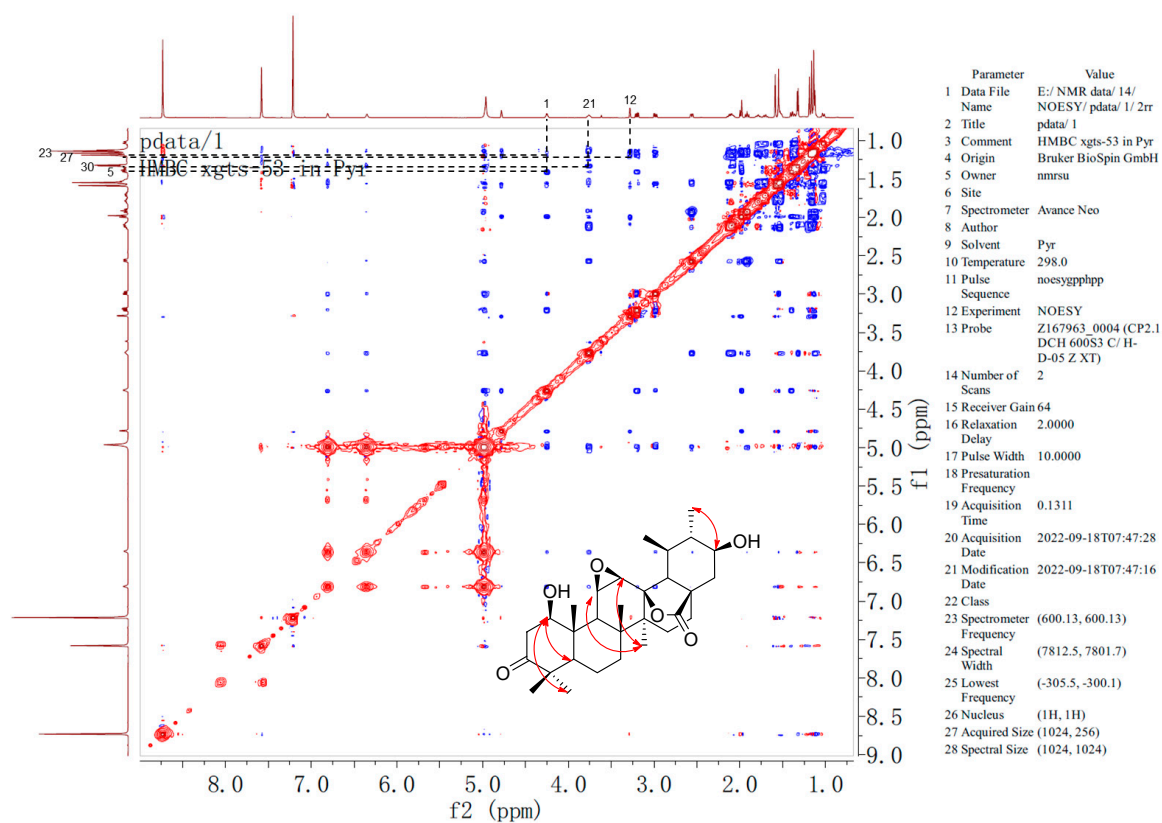

**Figure S63** NOESY spectrum (600 MHz) of compound **14** in Pyridine-*d*<sub>5</sub>

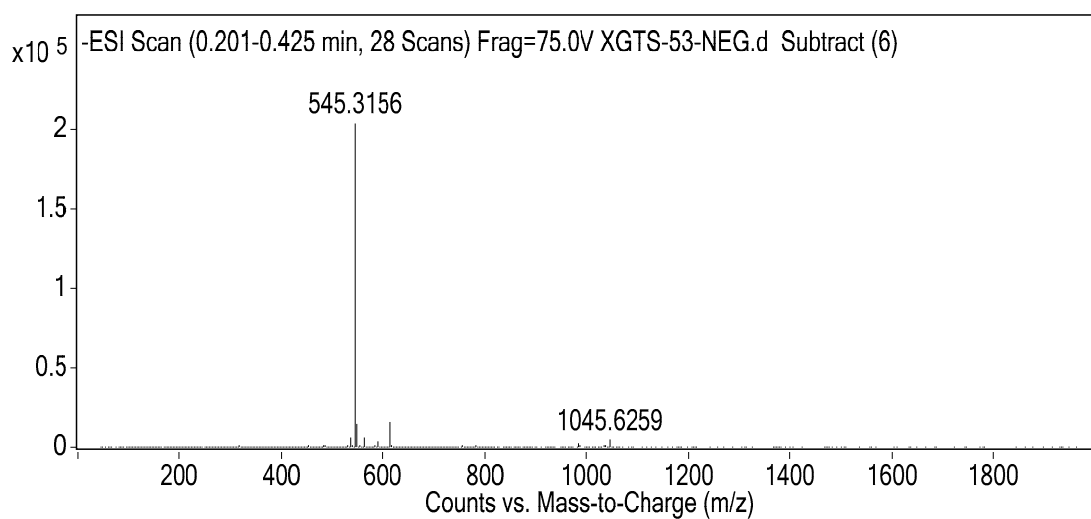

**Figure S64** HR-ESI-MS spectrum of compound **14**

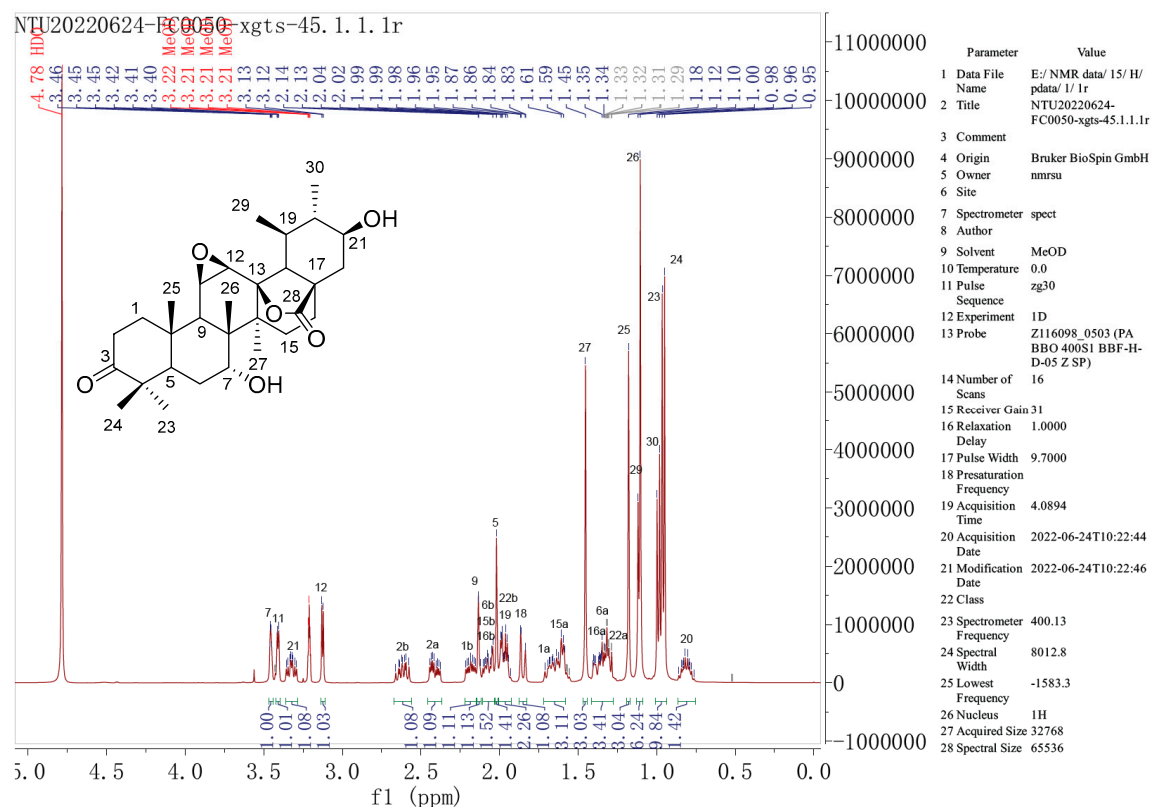

Figure S65  $^1\text{H}$  NMR spectrum (400 MHz) of compound **15** in  $\text{CD}_3\text{OD}$

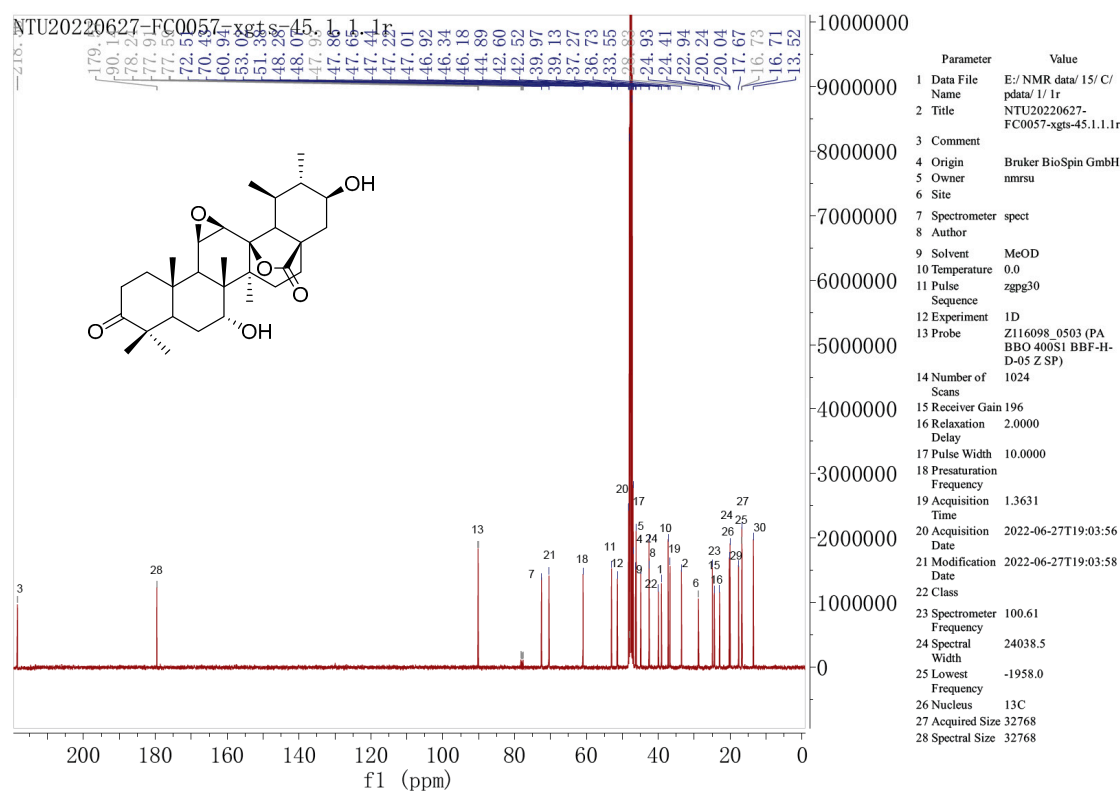

Figure S66  $^{13}\text{C}$  NMR spectrum (100 MHz) of compound **15** in  $\text{CD}_3\text{OD}$

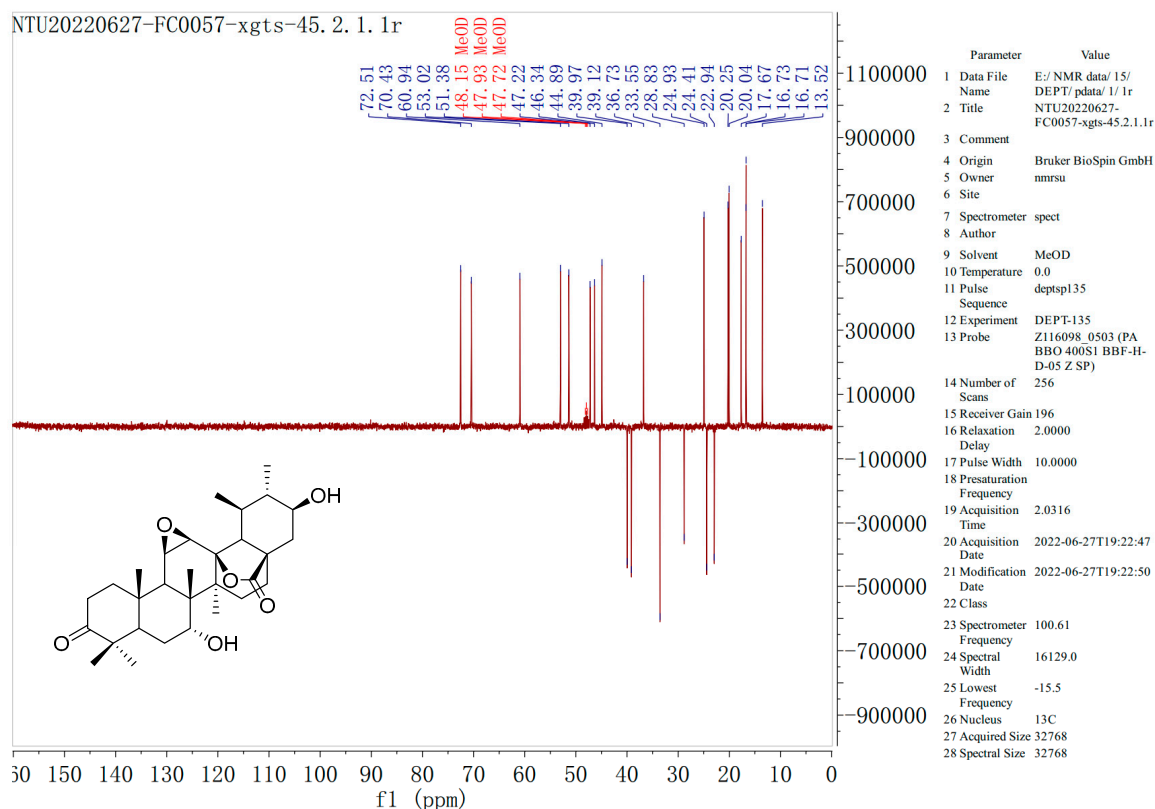

Figure S67 DEPT-135 spectrum (100 MHz) of compound **15** in CD<sub>3</sub>OD

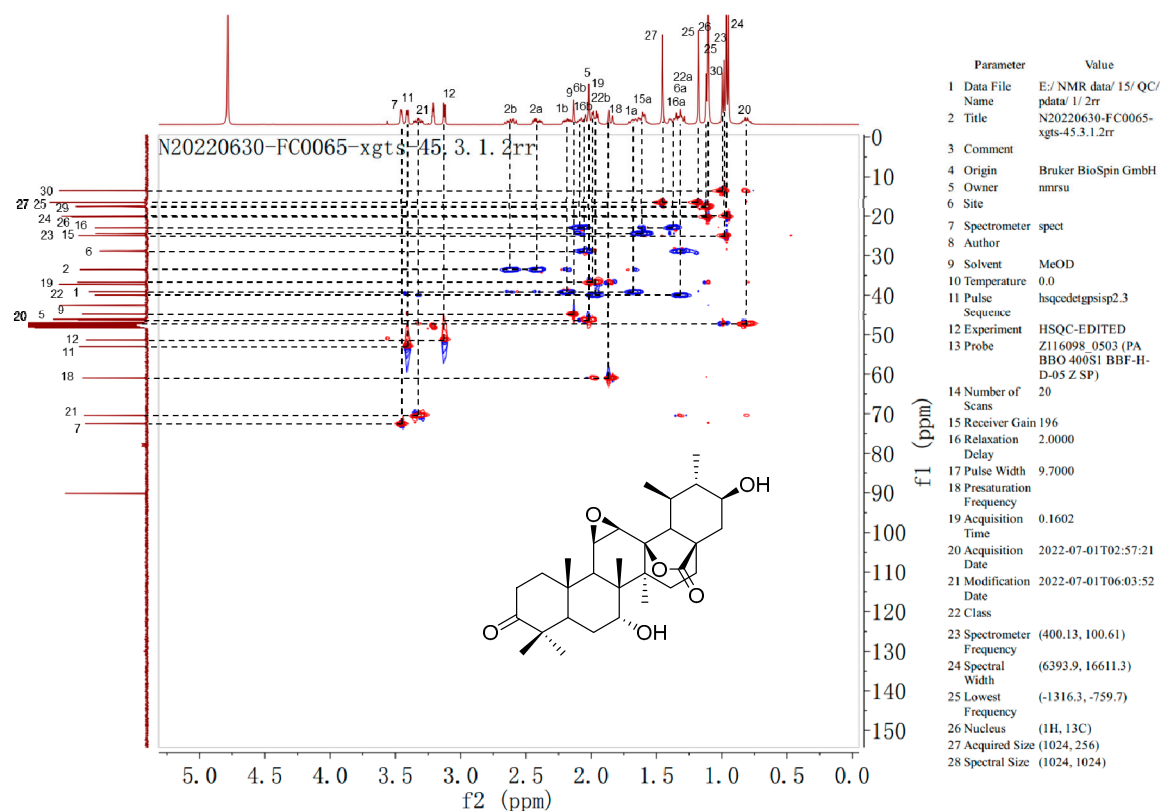

Figure S68 HSQC spectrum (100 MHz) of compound **15** in CD<sub>3</sub>OD



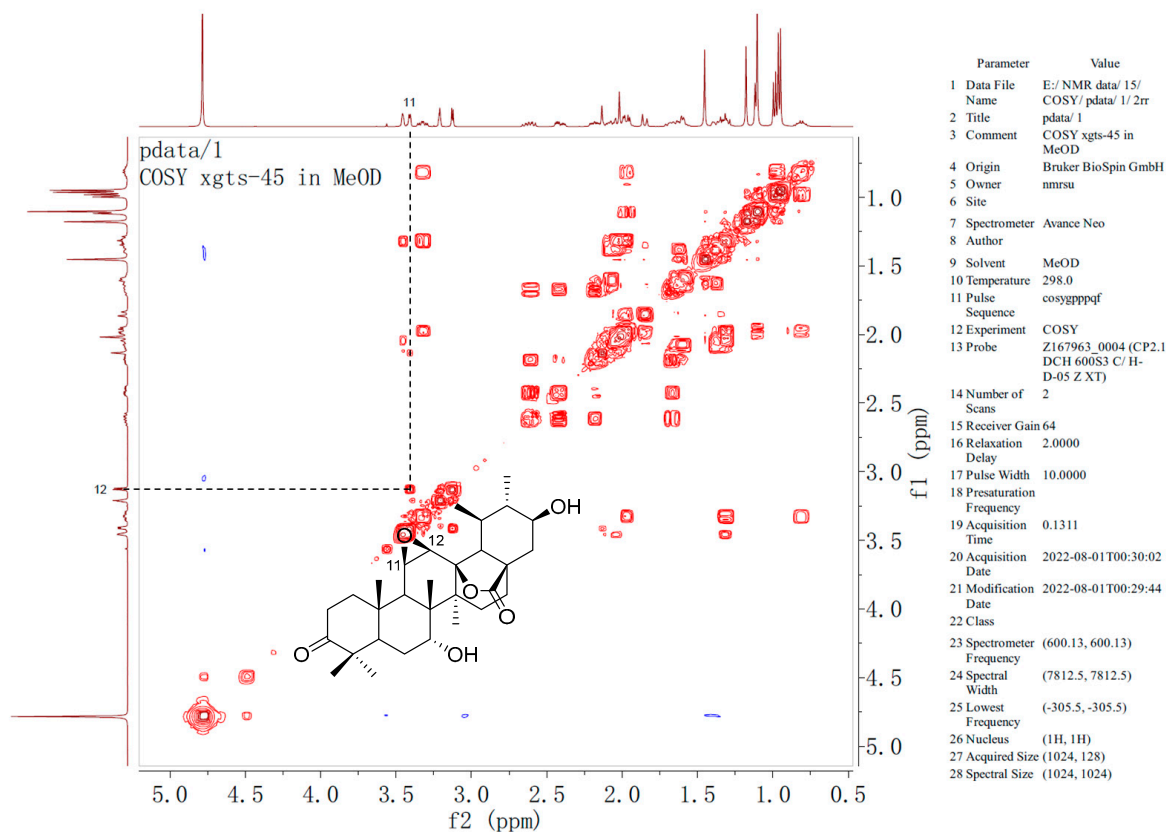

**Figure S69**  $^1\text{H}$ - $^1\text{H}$  COSY spectrum (400 MHz) of compound **15** in  $\text{CD}_3\text{OD}$

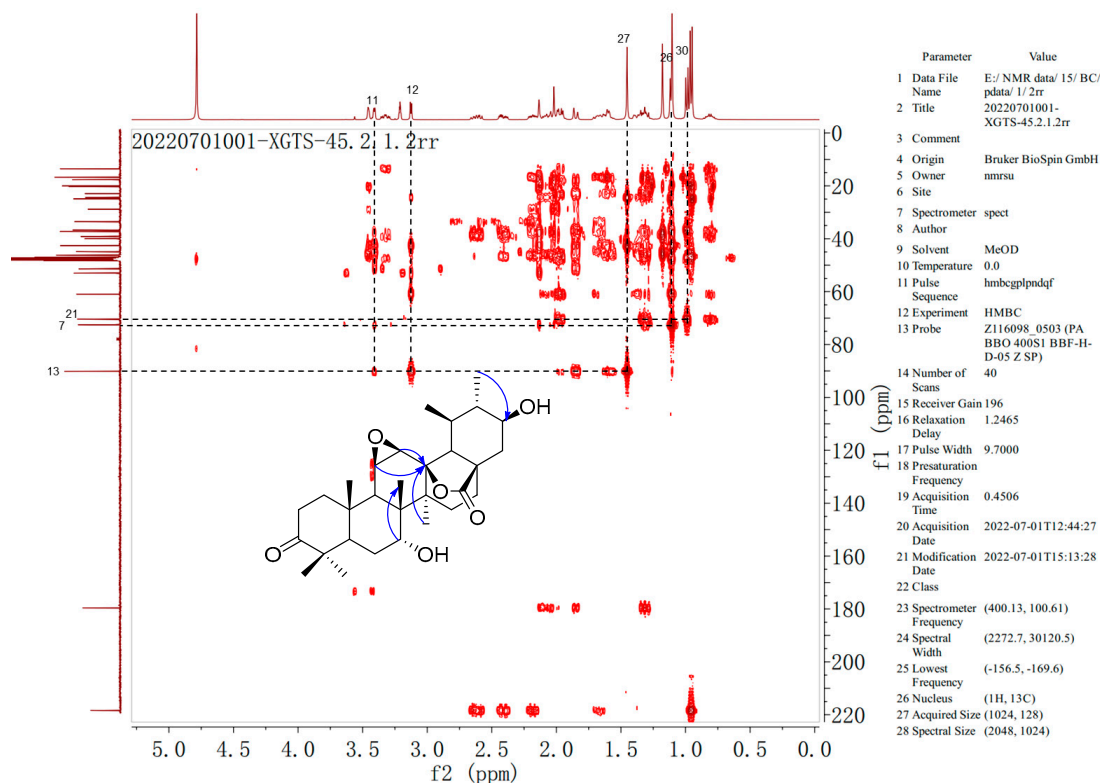

**Figure S70** HMBC spectrum (100 MHz) of compound **15** in  $\text{CD}_3\text{OD}$

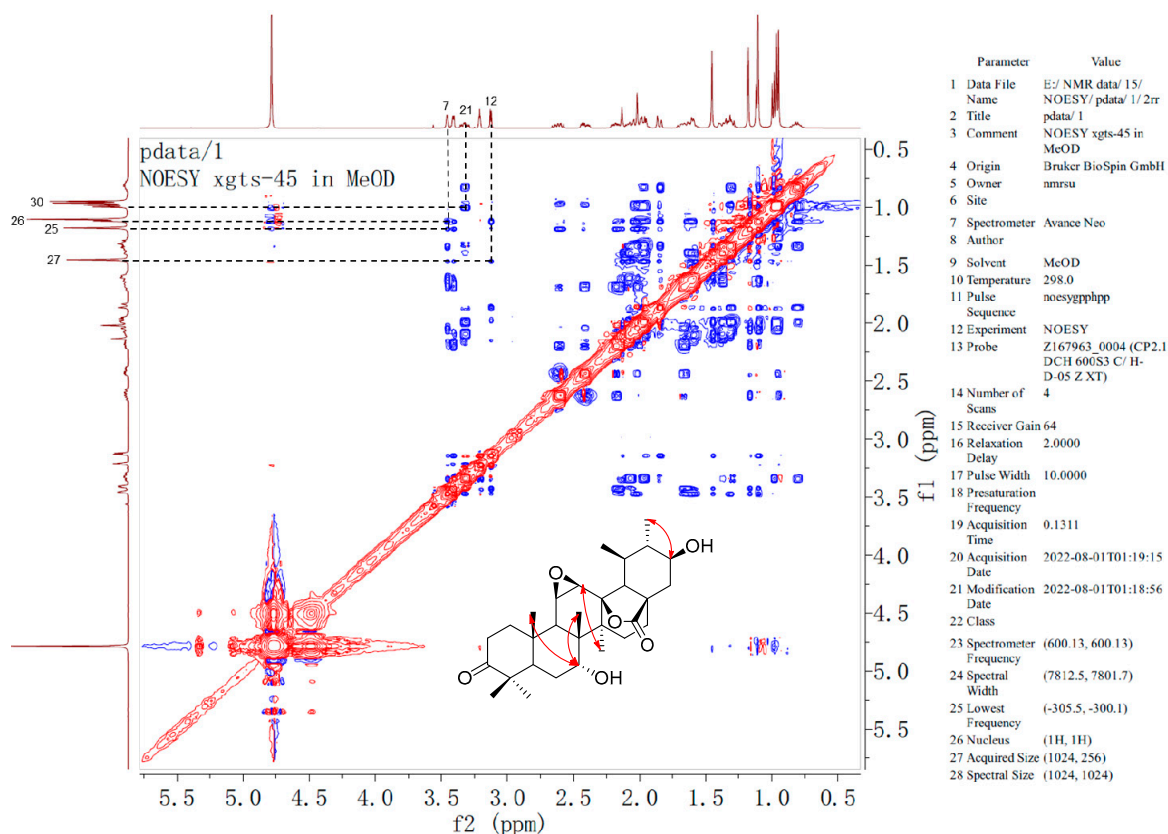

**Figure S71** NOESY spectrum (400 MHz) of compound **15** in CD<sub>3</sub>OD

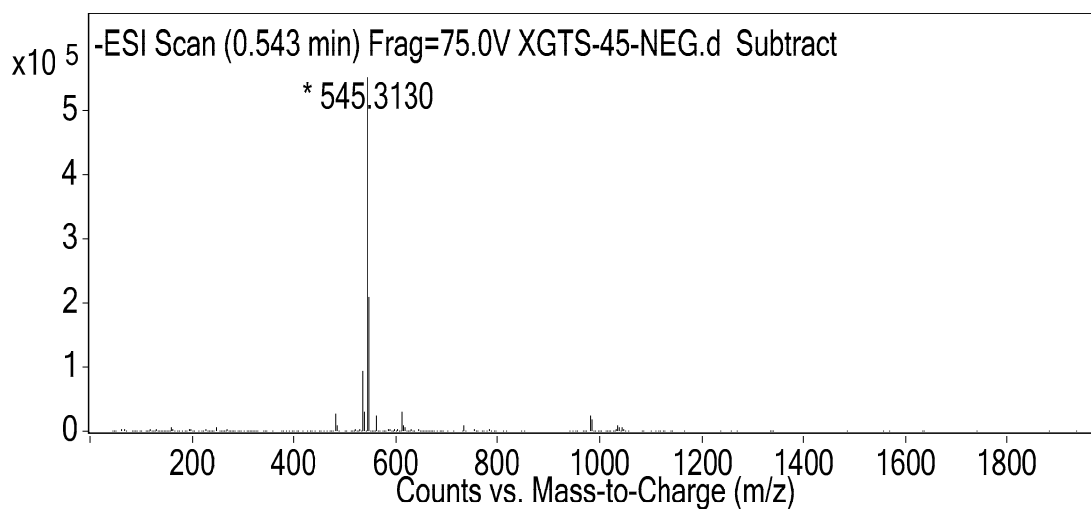

**Figure S72** HR-ESI-MS spectrum of compound **15**



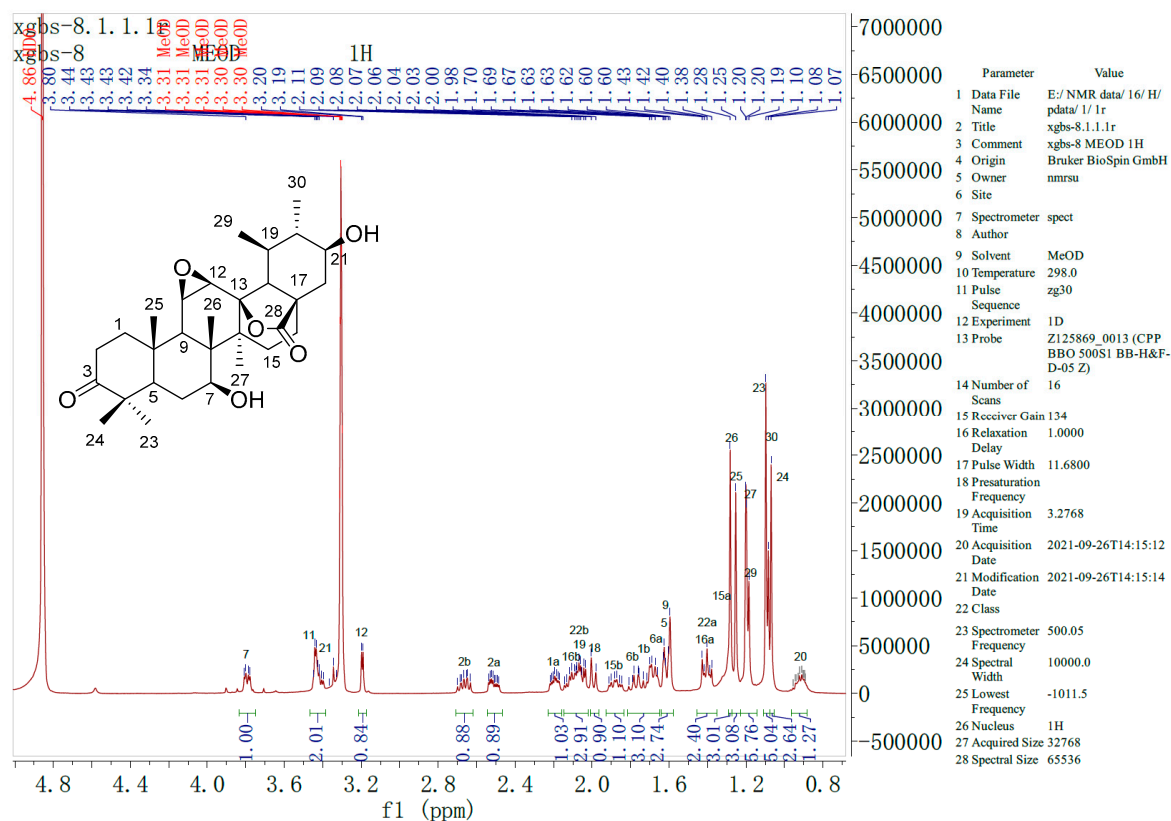

**Figure S73**  $^1\text{H}$  NMR spectrum (500 MHz) of compound **16** in  $\text{CD}_3\text{OD}$

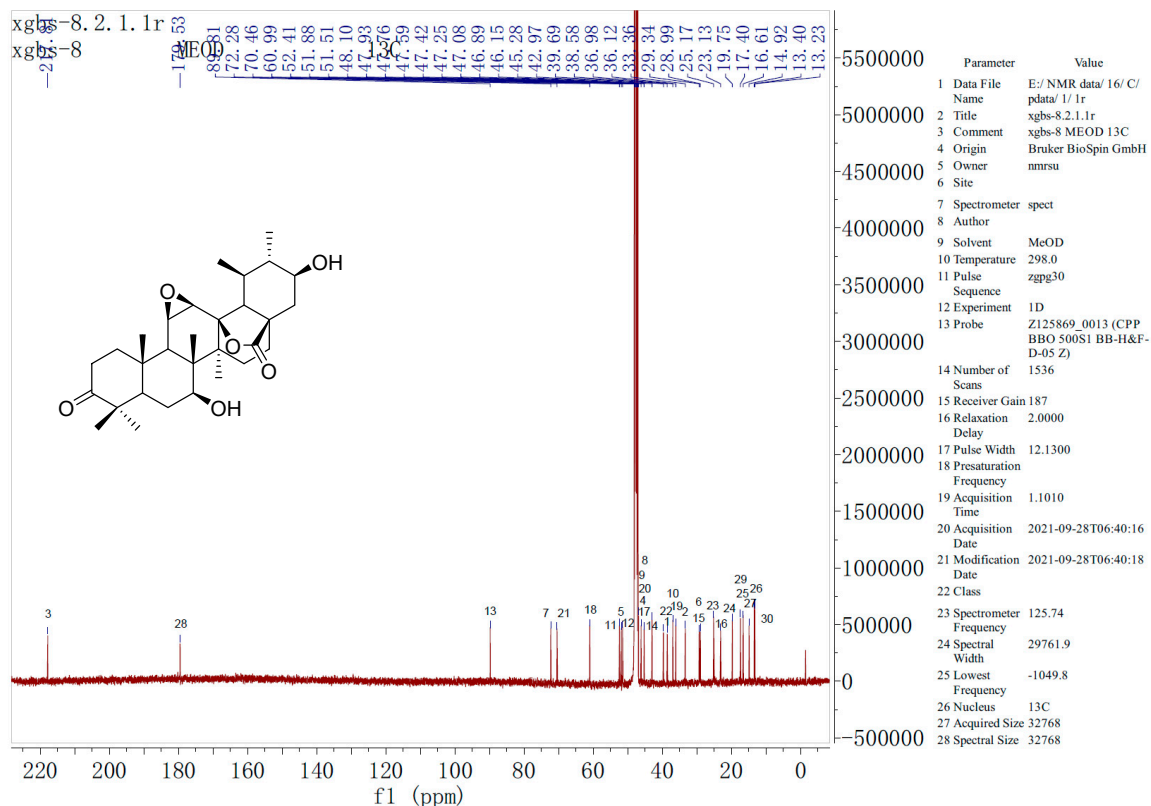

**Figure S74**  $^{13}\text{C}$  NMR spectrum (125 MHz) of compound **16** in  $\text{CD}_3\text{OD}$

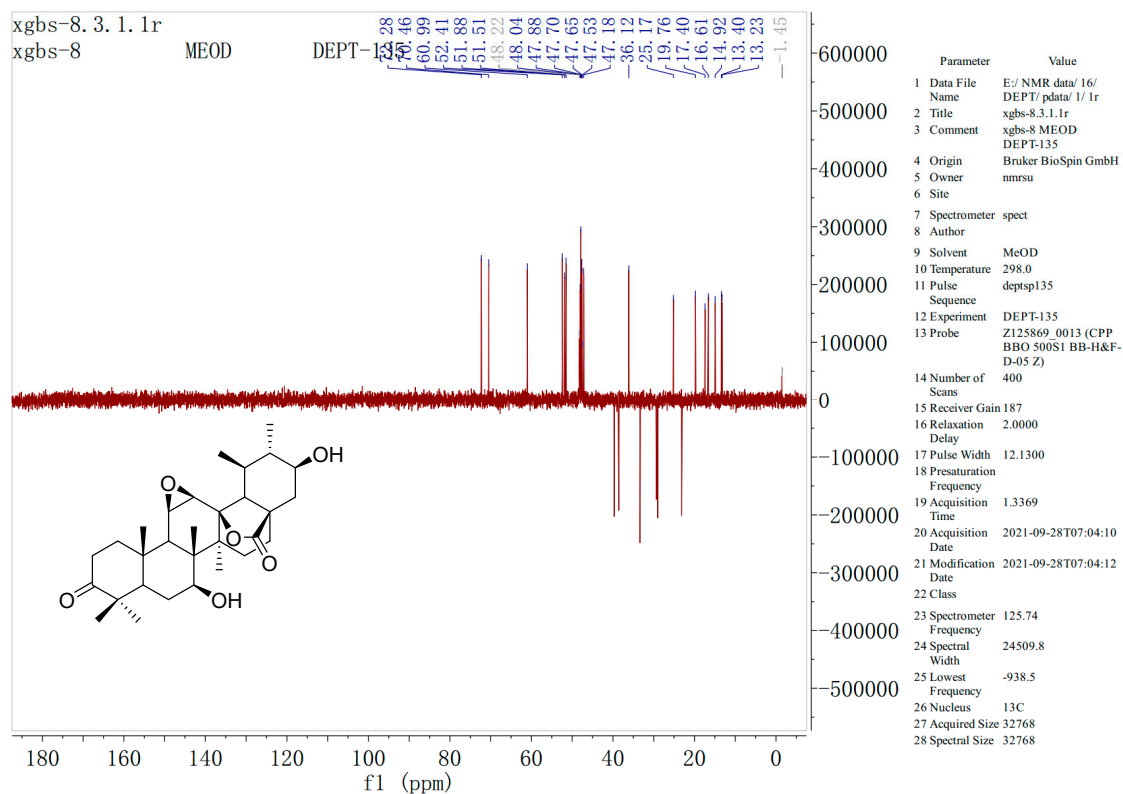

Figure S75 DEPT-135 spectrum (125 MHz) of compound 16 in CD<sub>3</sub>OD

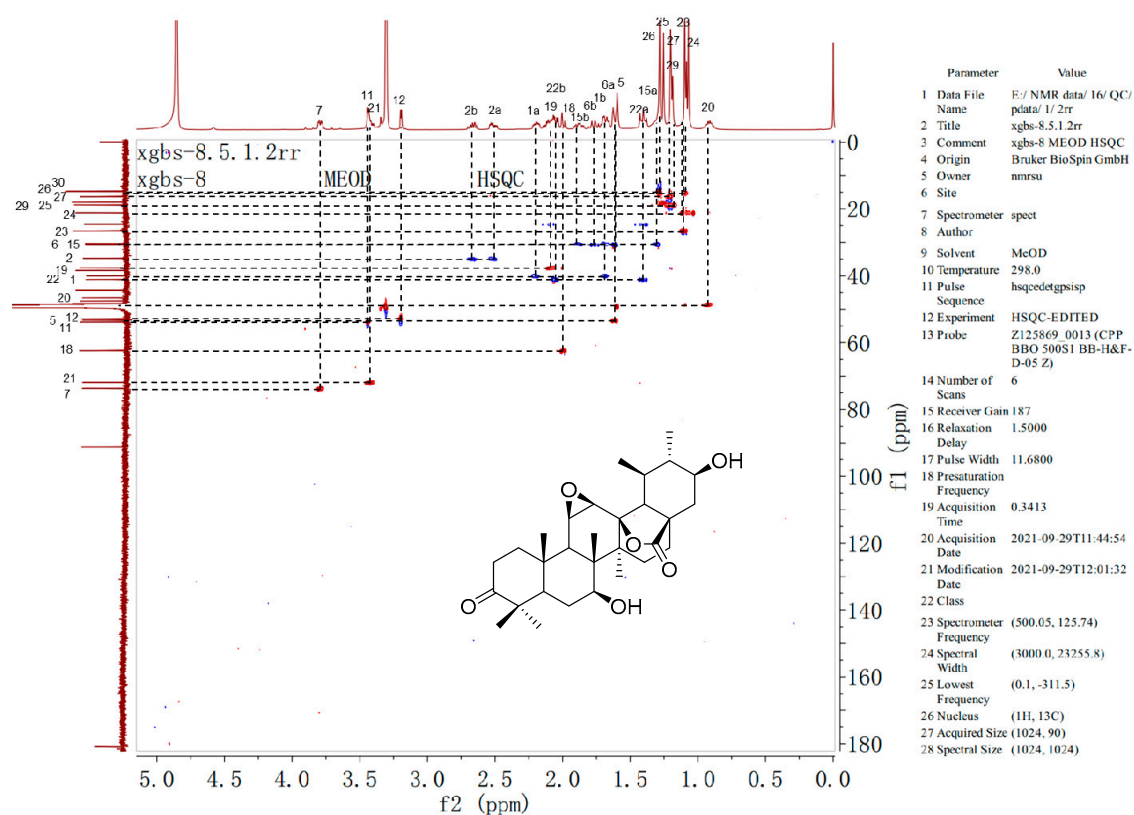

Figure S76 HSQC spectrum (125 Mz) of compound 16 in CD<sub>3</sub>OD

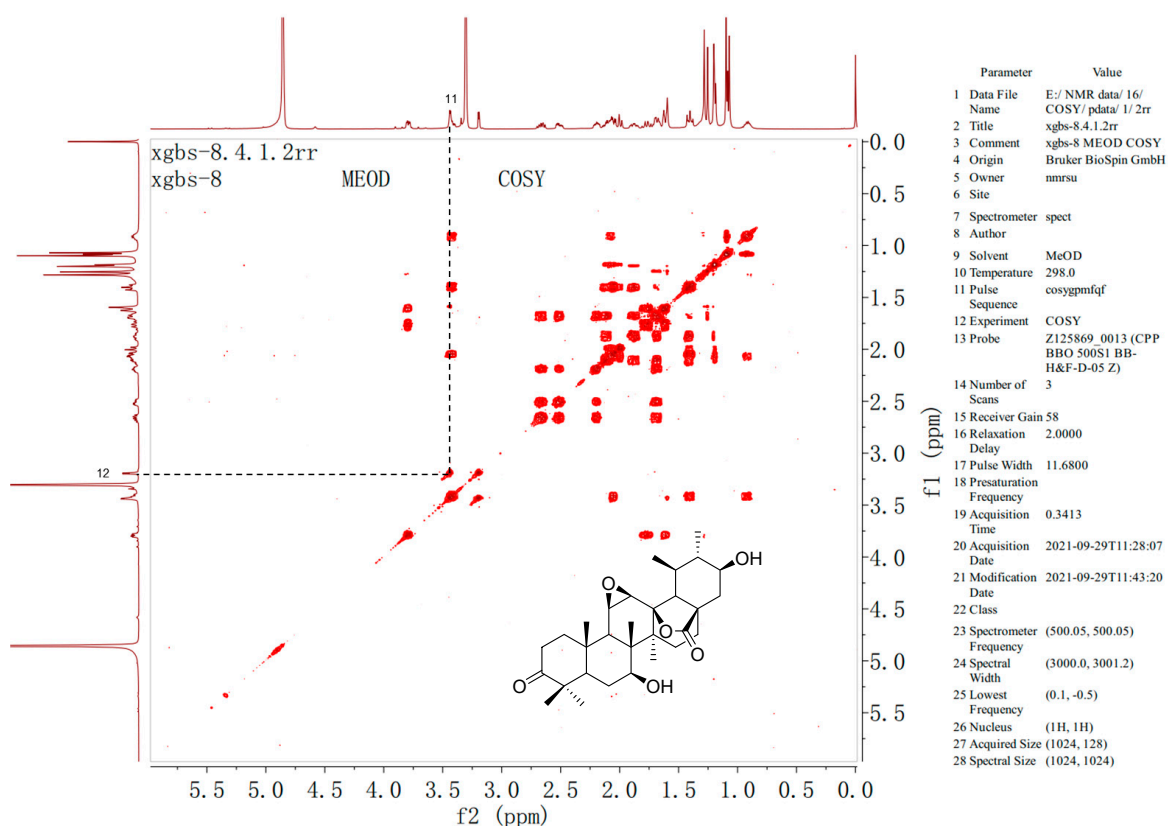

**Figure S77**  $^1\text{H}$ - $^1\text{H}$  COSY spectrum (400 MHz) of compound **16** in  $\text{CD}_3\text{OD}$

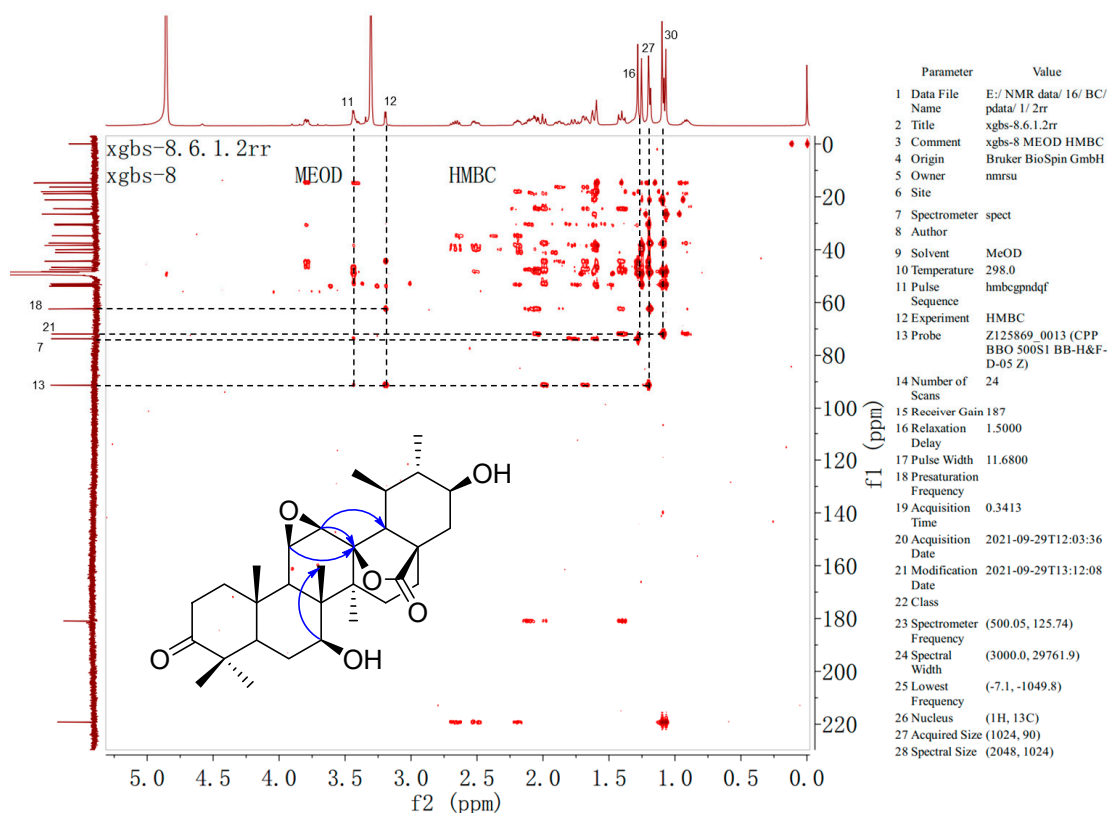

**Figure S78** HMBC spectrum (125 MHz) of compound **16** in  $\text{CD}_3\text{OD}$

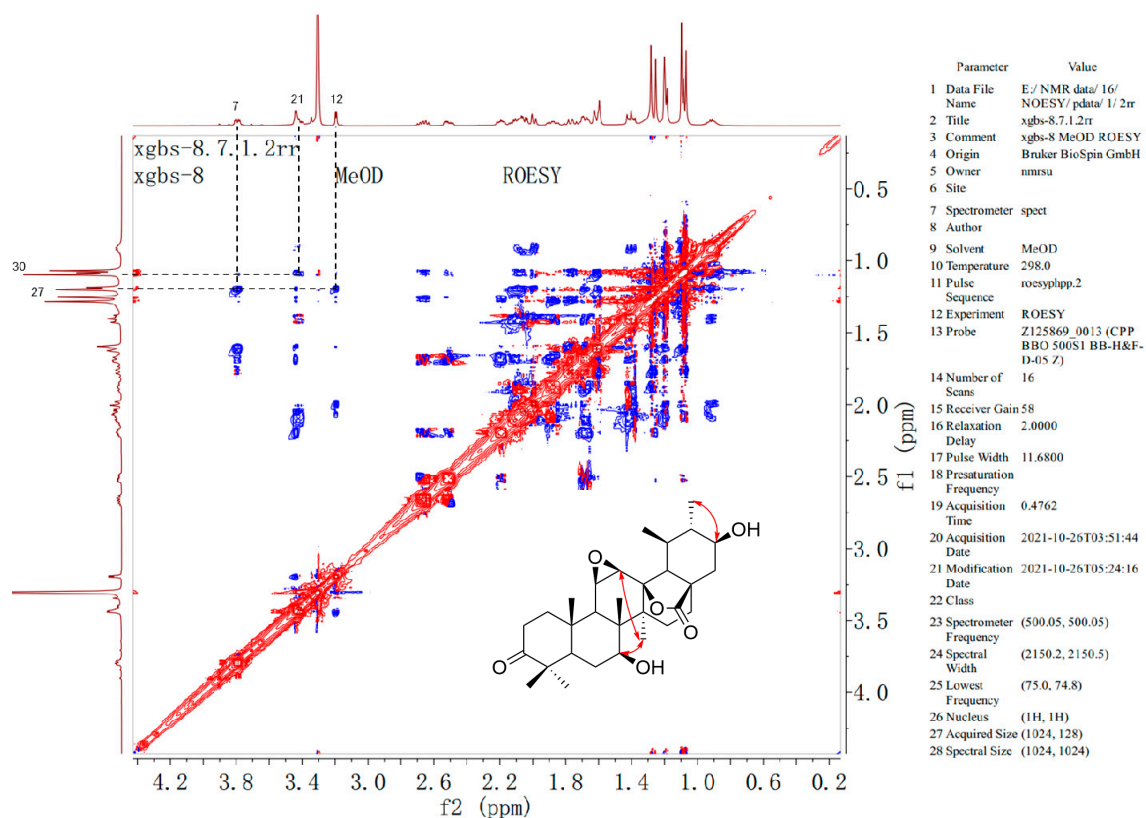

**Figure S79** NOESY spectrum (500 MHz) of compound **16** in CD<sub>3</sub>OD

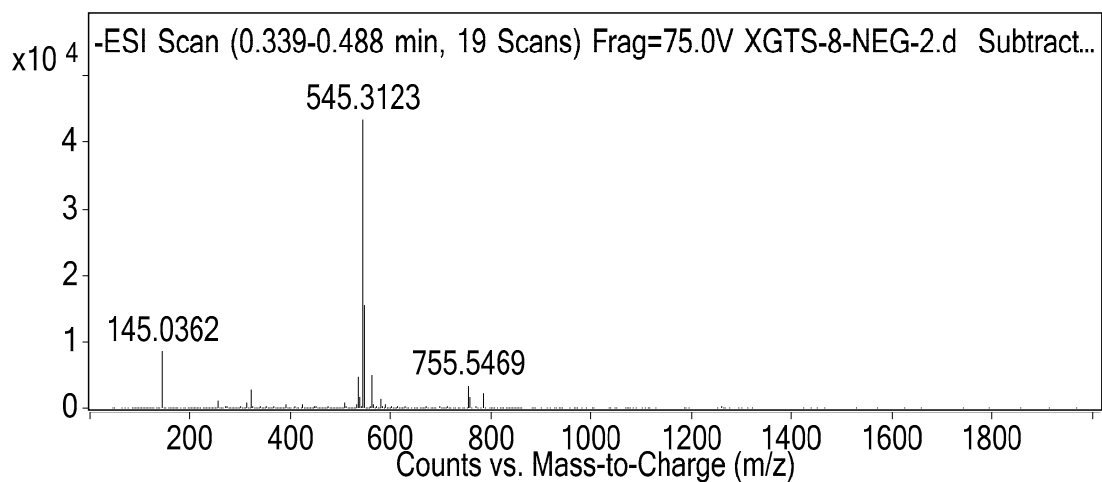

**Figure S80** HR-ESI-MS spectrum of compound **16**

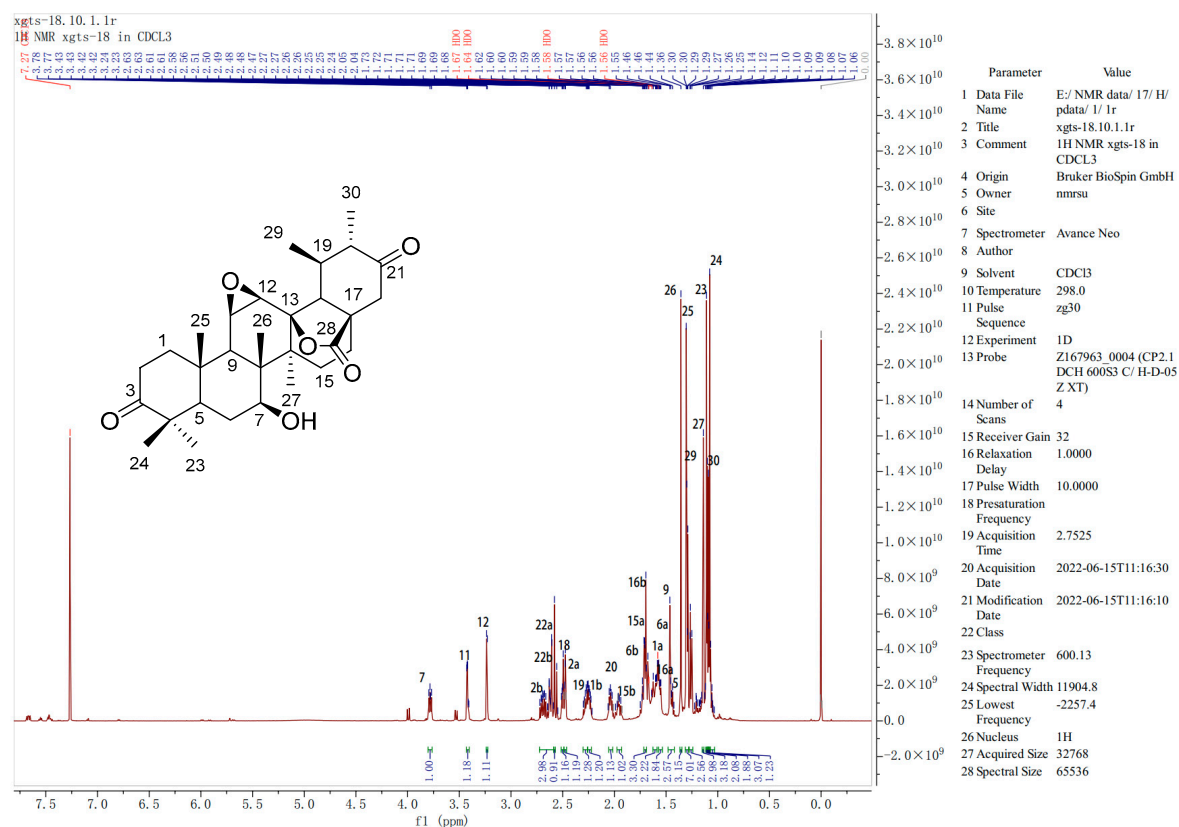

Figure S81  $^1\text{H}$  NMR spectrum (400 MHz) of compound **17** in  $\text{CDCl}_3$

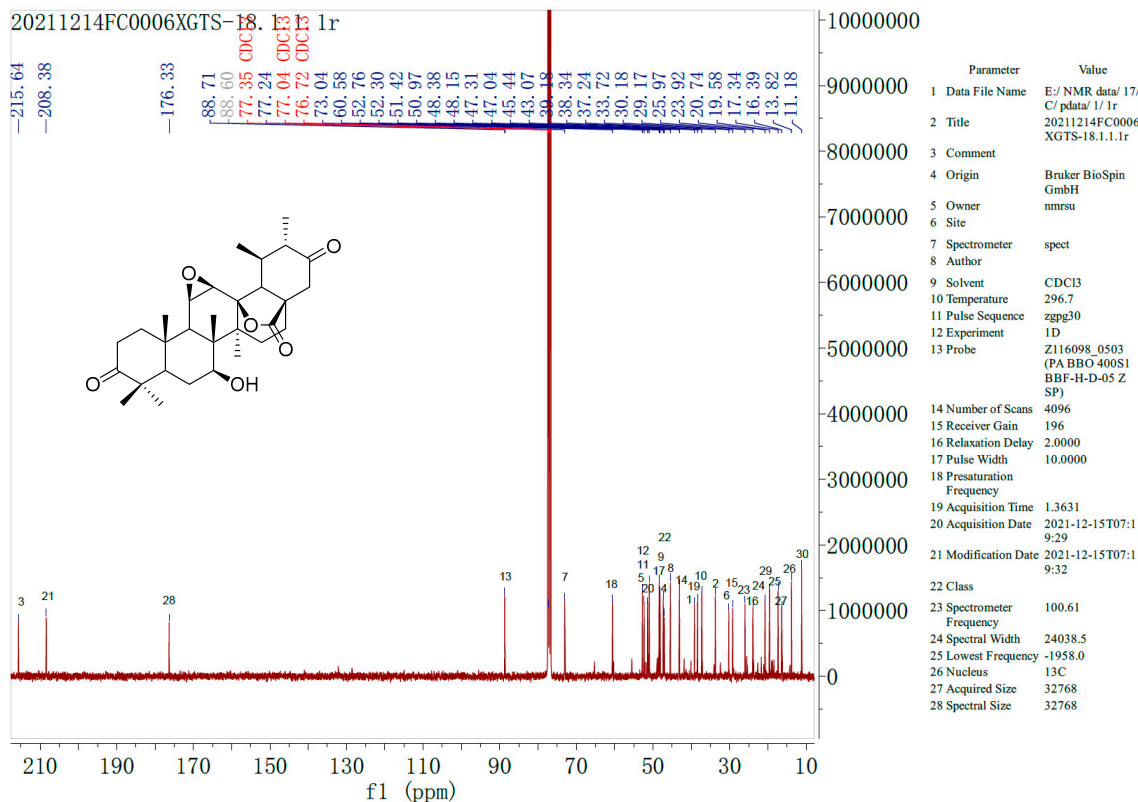

Figure S82  $^{13}\text{C}$  NMR spectrum (100 MHz) of compound **17** in  $\text{CDCl}_3$



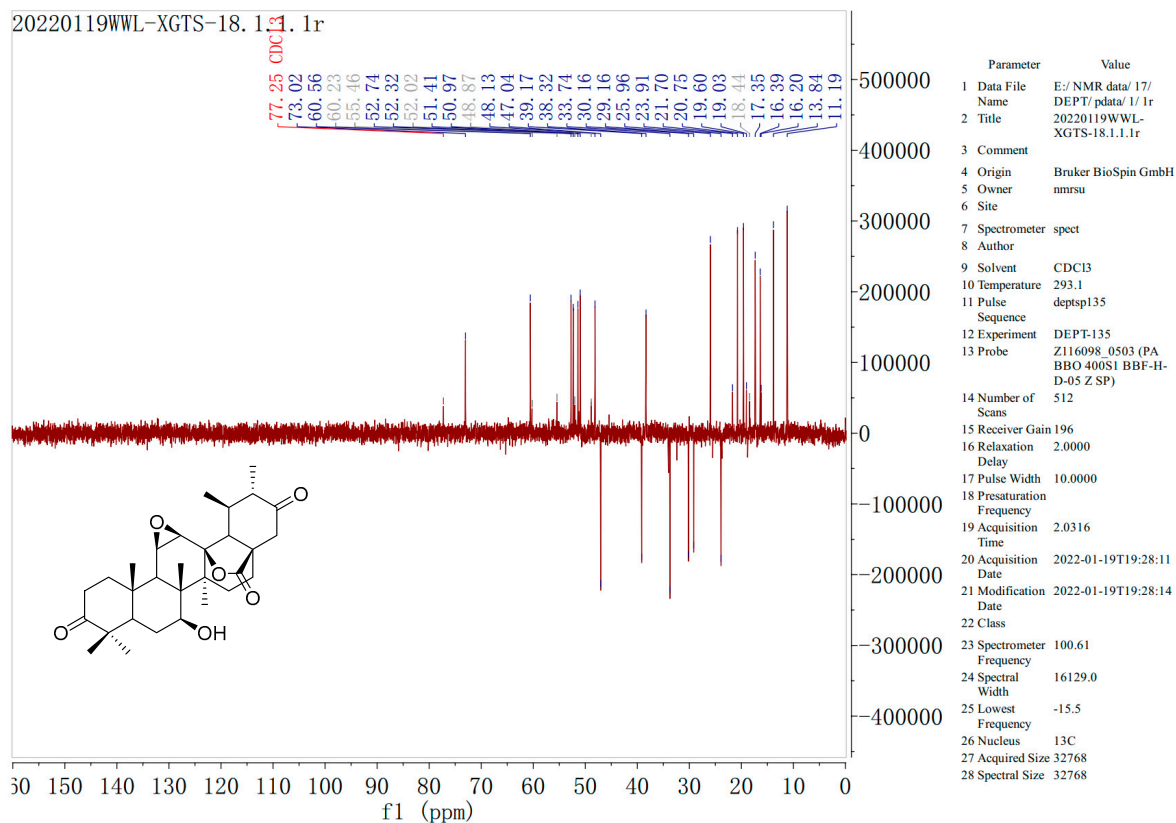

**Figure S83** DEPT-135 spectrum (100 MHz) of compound **17** in CDCl<sub>3</sub>

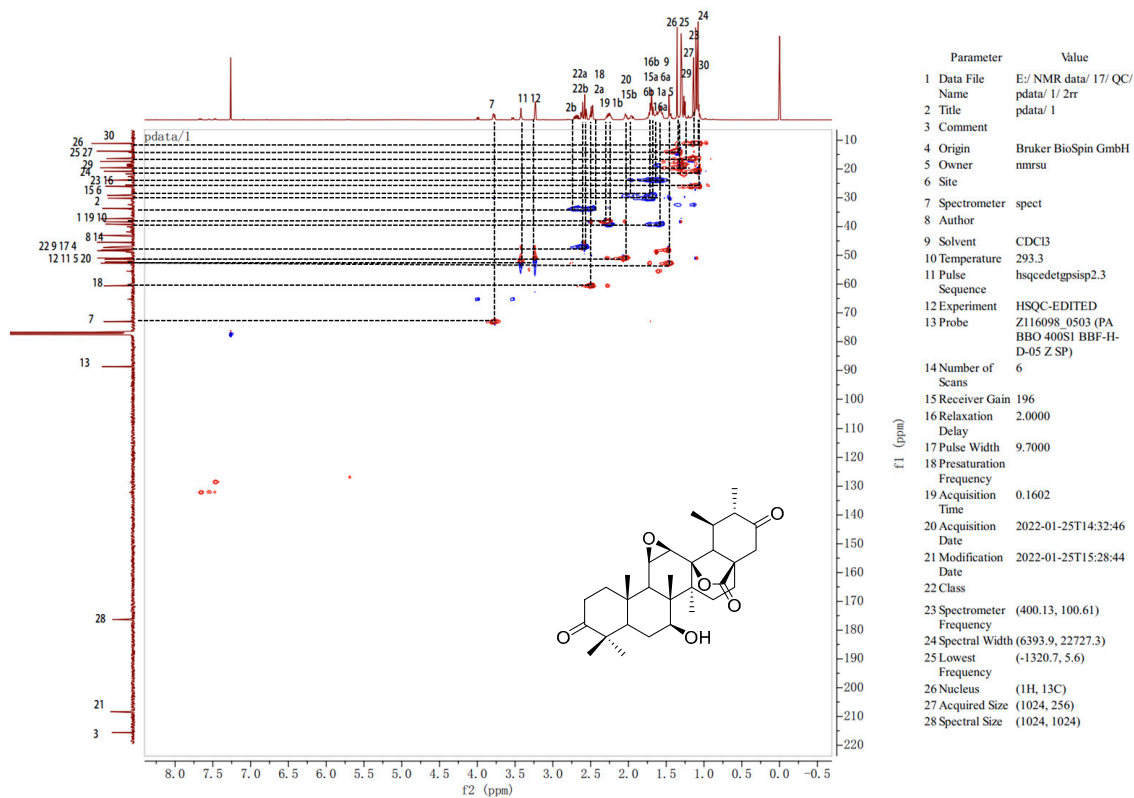

**Figure S84** HSQC spectrum (100 MHz) of compound **17** in CDCl<sub>3</sub>

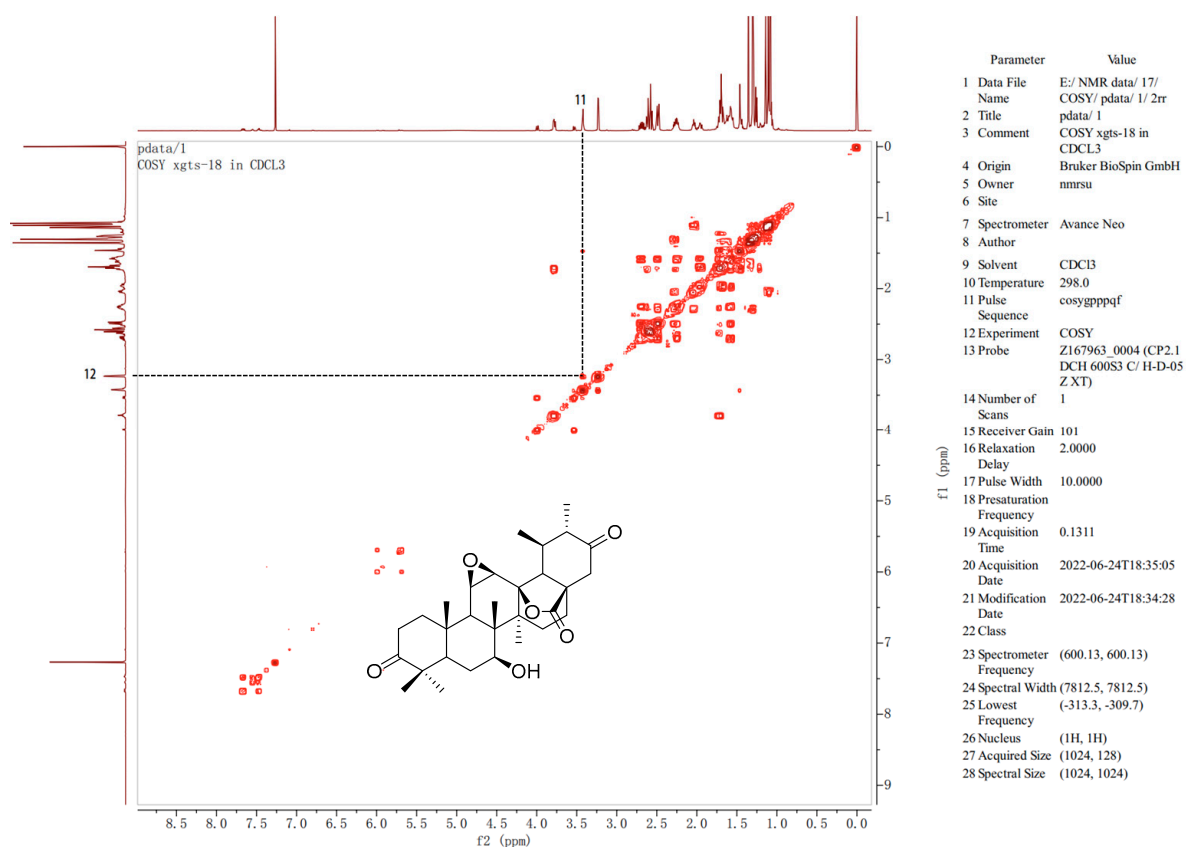

Figure S85  $^1\text{H}$ - $^1\text{H}$  COSY spectrum (400 MHz) of compound **17** in  $\text{CDCl}_3$

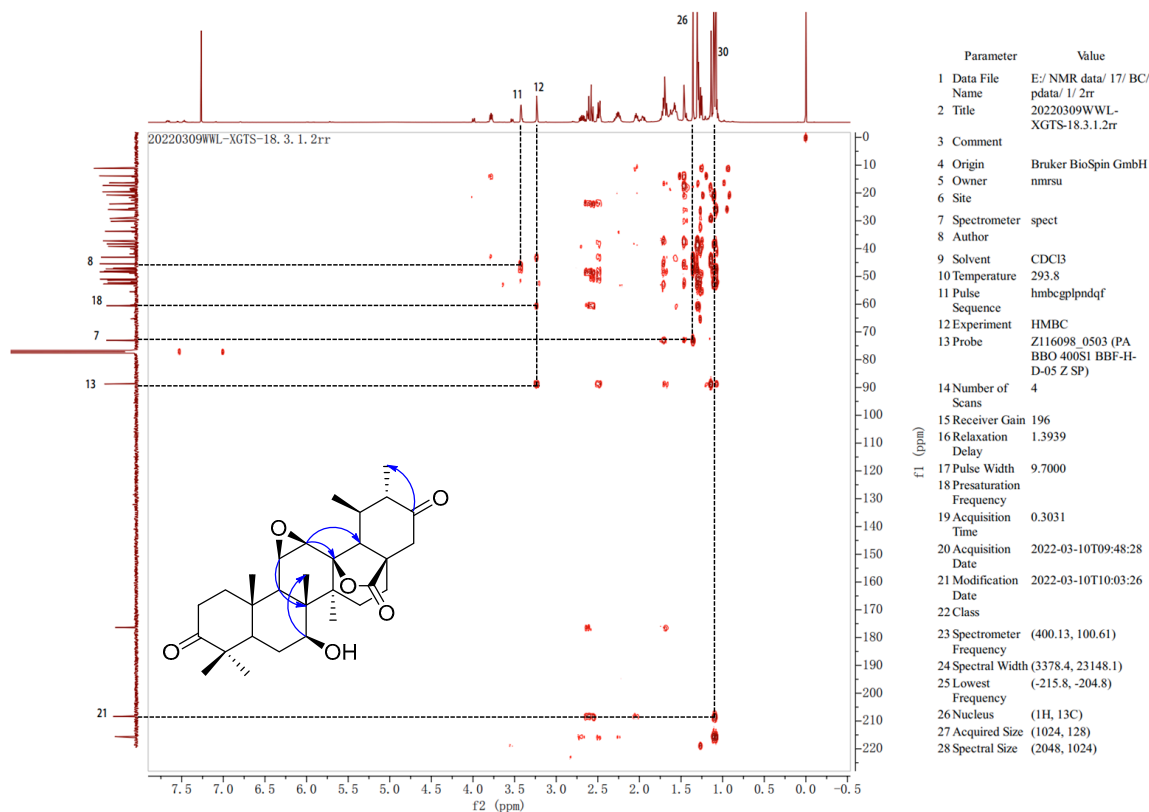

Figure S86 HMBC spectrum (100 MHz) of compound **17** in  $\text{CDCl}_3$

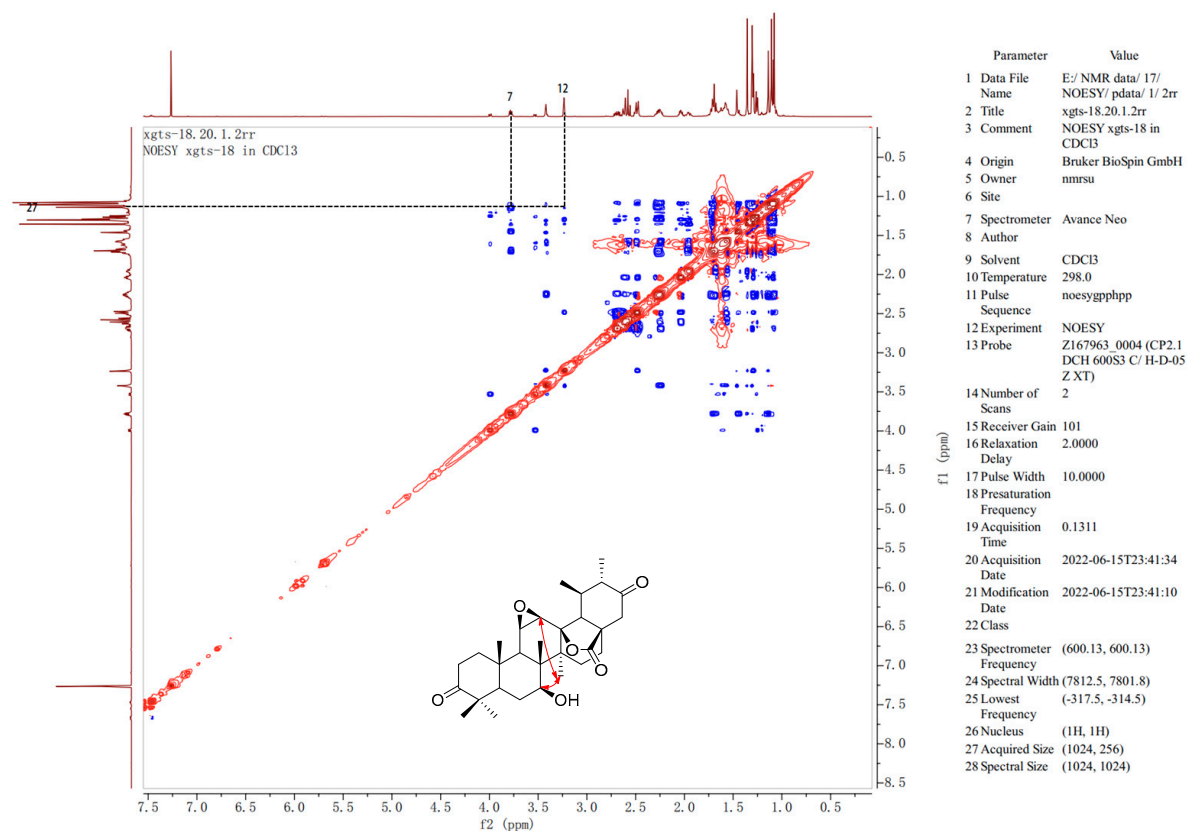

**Figure S87** NOESY spectrum (400 MHz) of compound **17** in CDCl<sub>3</sub>

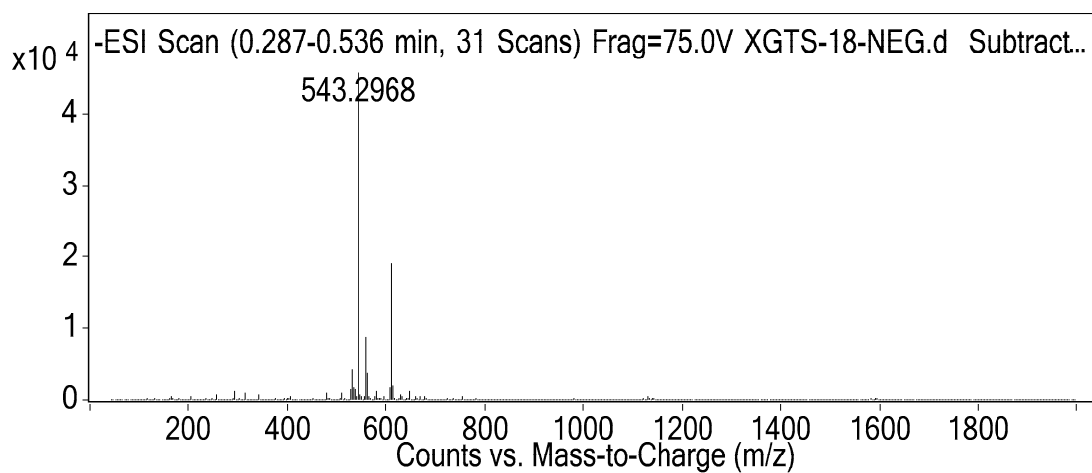

**Figure S88** HR-ESI-MS spectrum of compound **17**



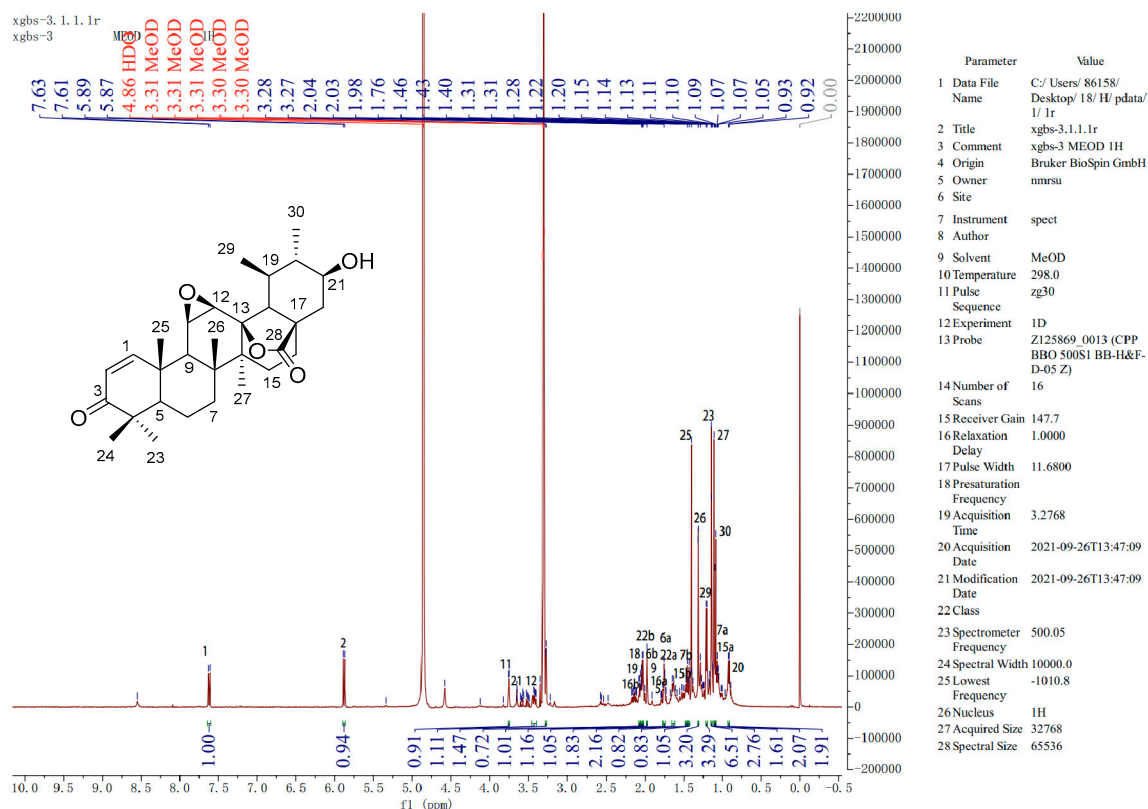

Figure S89  $^1\text{H}$  NMR spectrum (500 MHz) of compound **18** in  $\text{CD}_3\text{OD}$

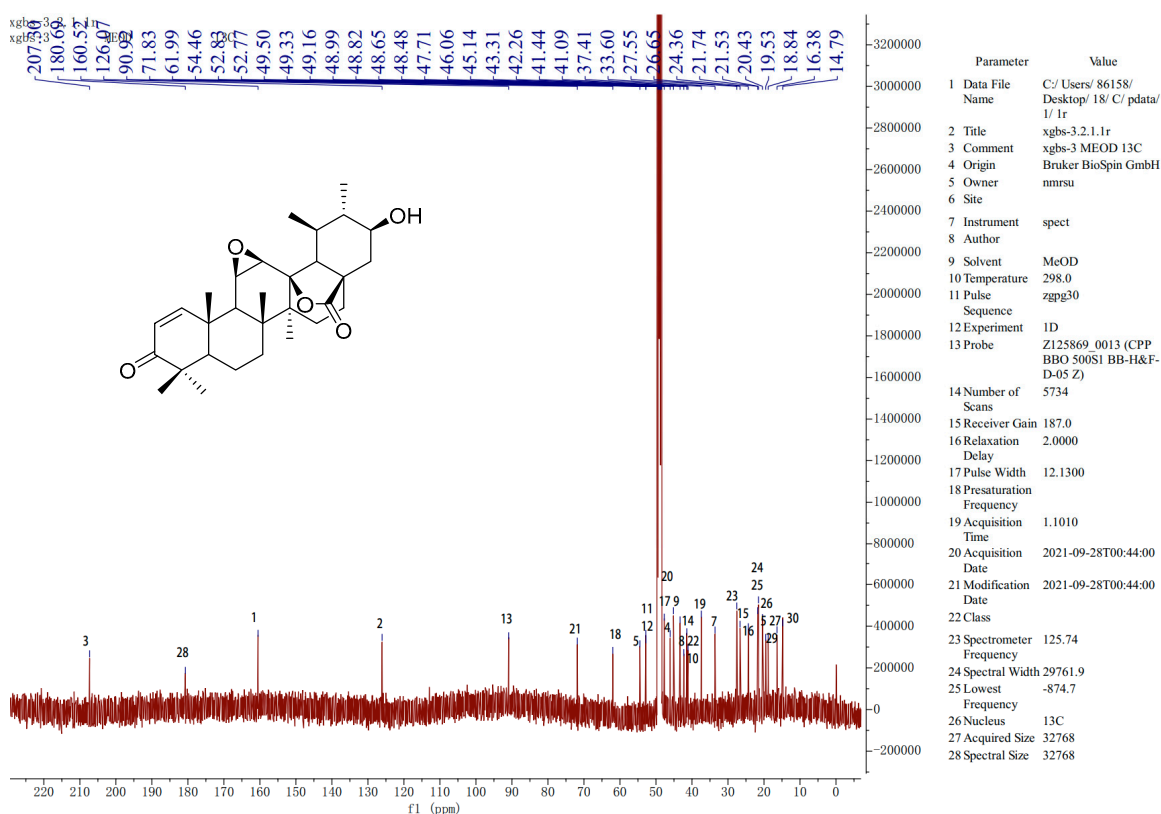

Figure S90  $^{13}\text{C}$  NMR spectrum (125 MHz) of compound **18** in  $\text{CD}_3\text{OD}$

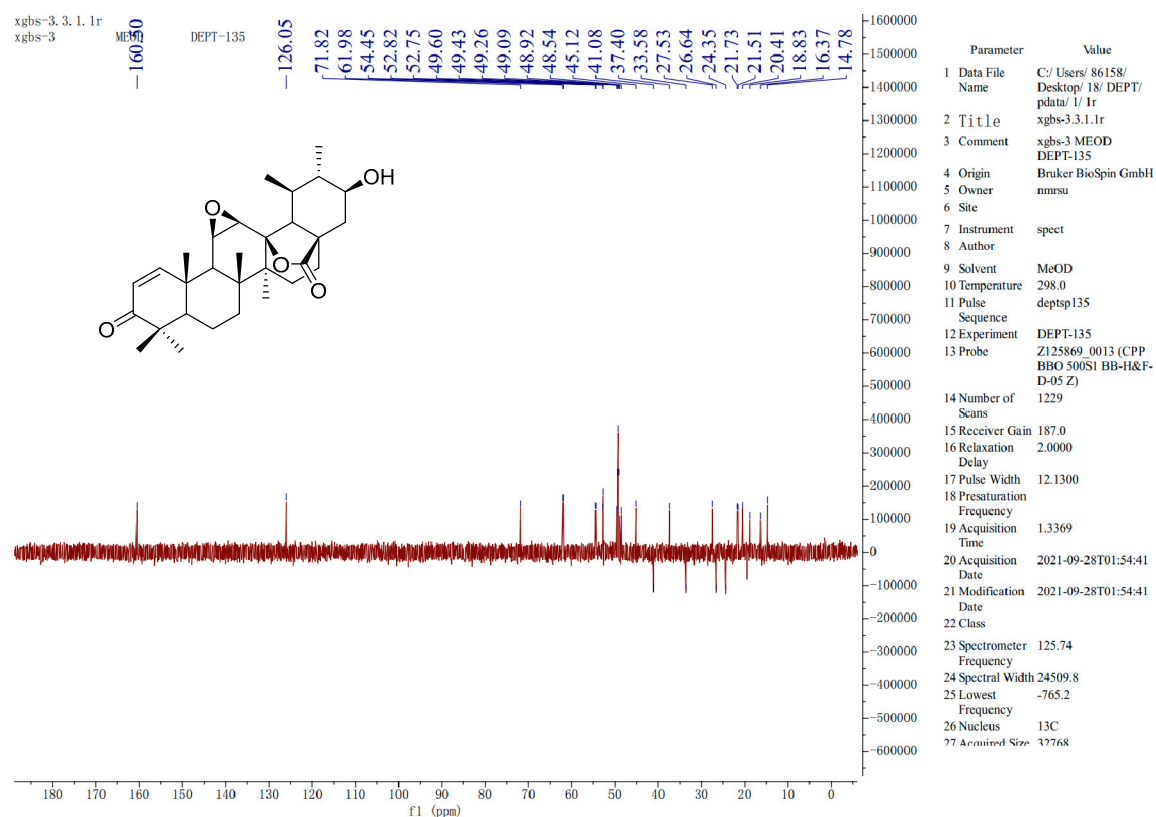

Figure S91 DEPT-135 spectrum (125 MHz) of compound 18 in CD<sub>3</sub>OD

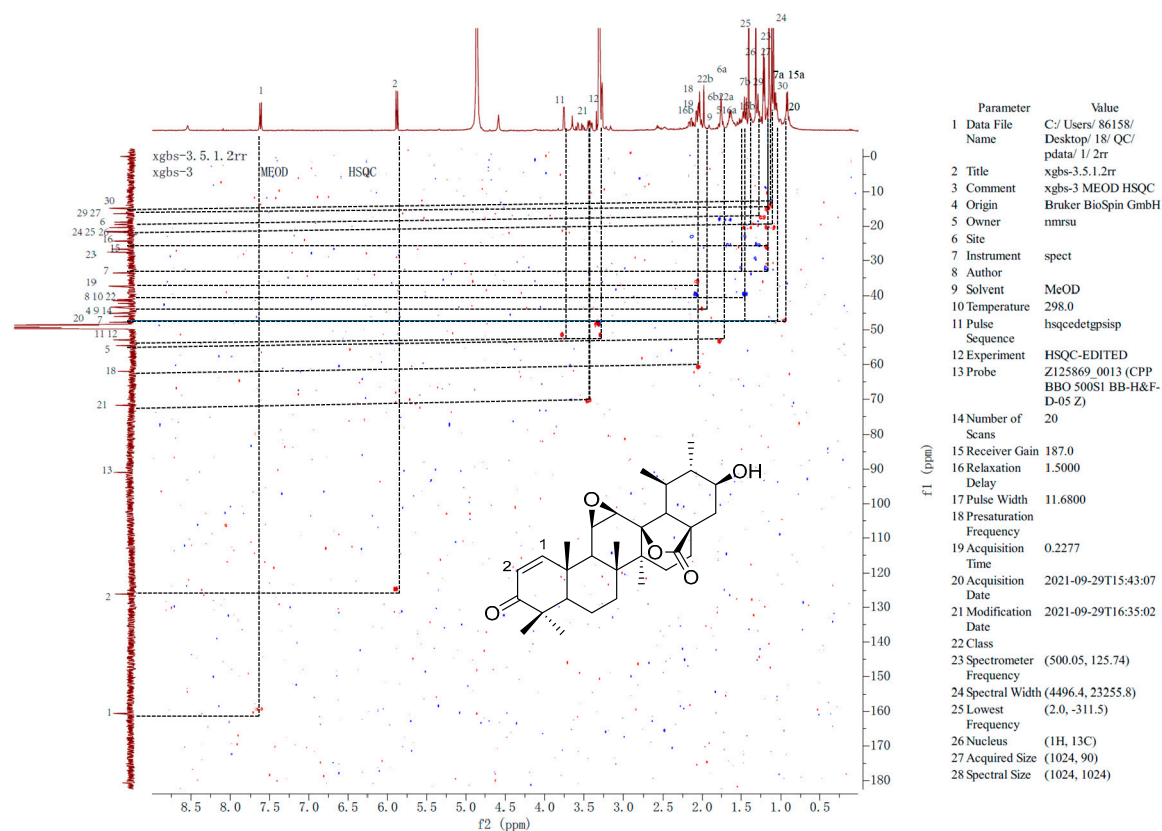

Figure S92 HSQC spectrum (125 MHz) of compound 18 in CD<sub>3</sub>OD

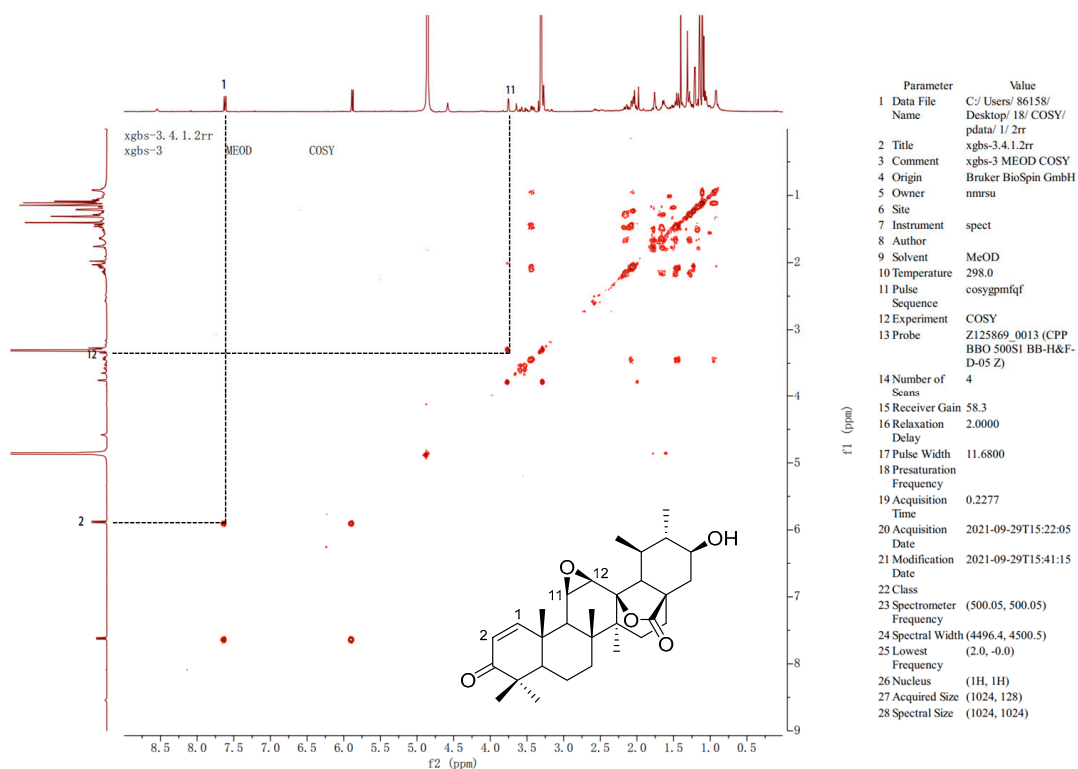

**Figure S93**  $^1\text{H}$ - $^1\text{H}$  COSY spectrum (500 MHz) of compound **18** in  $\text{CD}_3\text{OD}$

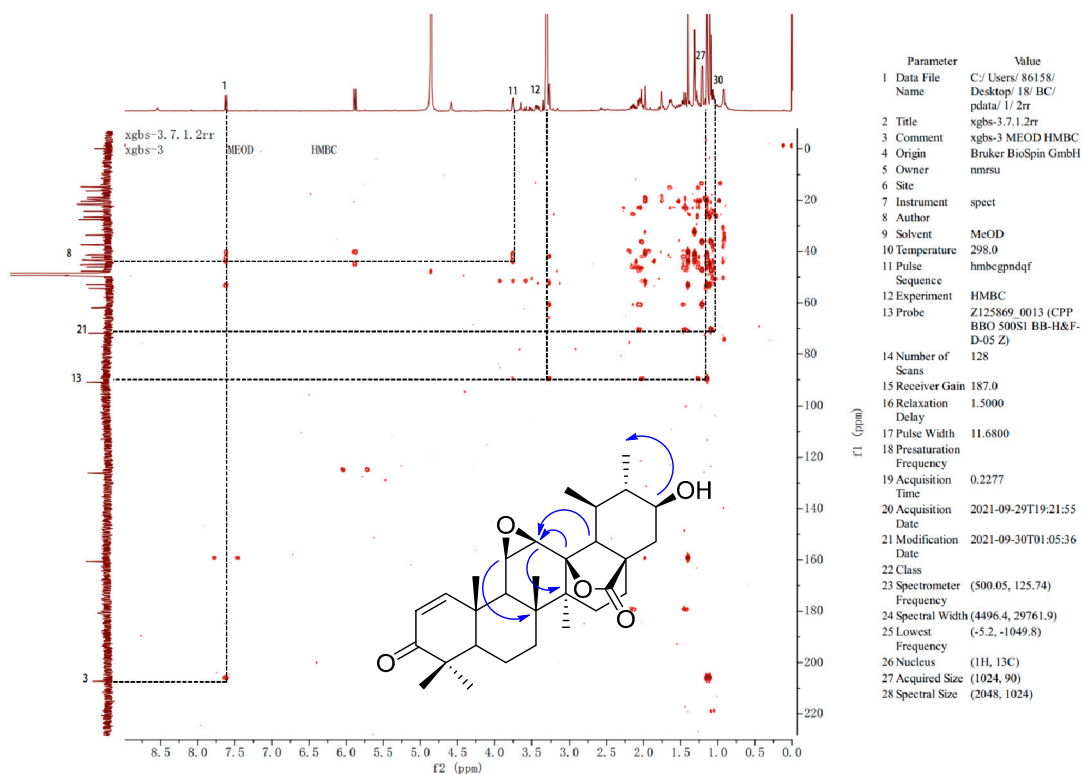

**Figure S94** HMBC spectrum (125 MHz) of compound **18** in  $\text{CD}_3\text{OD}$

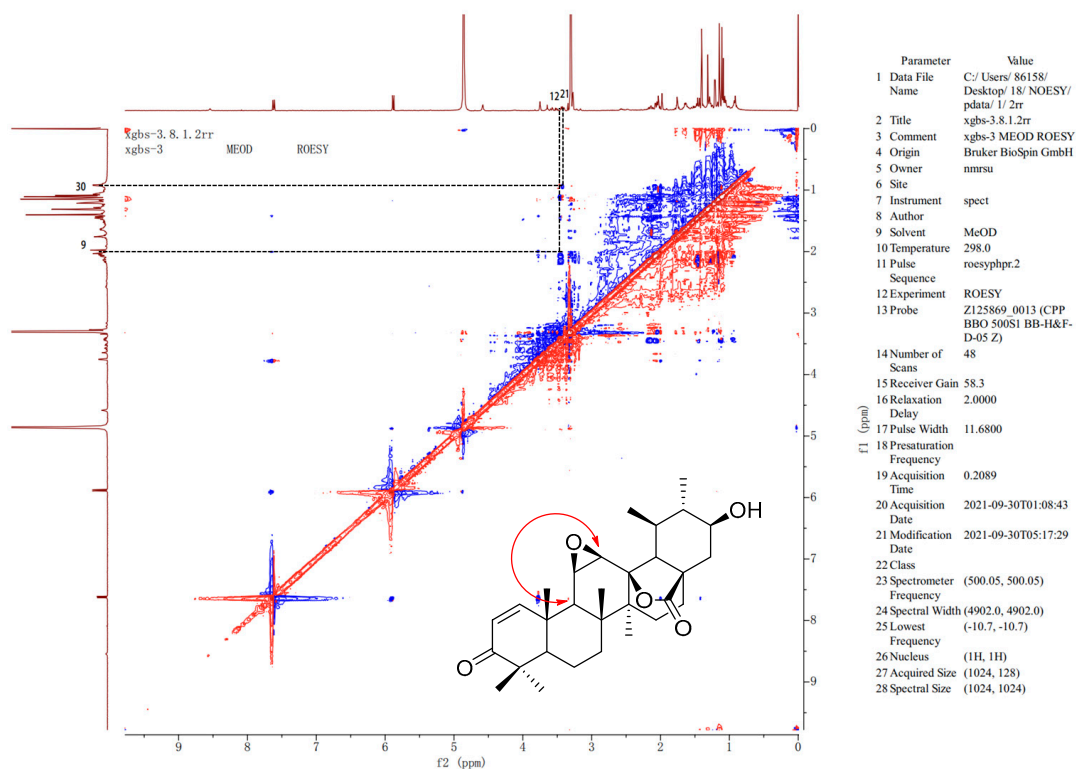

**Figure S95** NOESY spectrum (500 MHz) of compound **18** in CD<sub>3</sub>OD

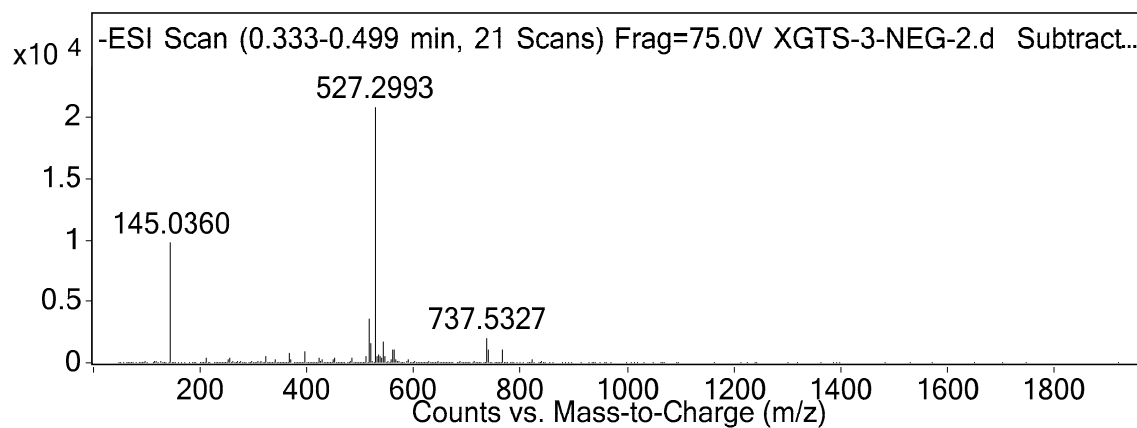

**Figure S96** HR-ESI-MS spectrum of compound **18**

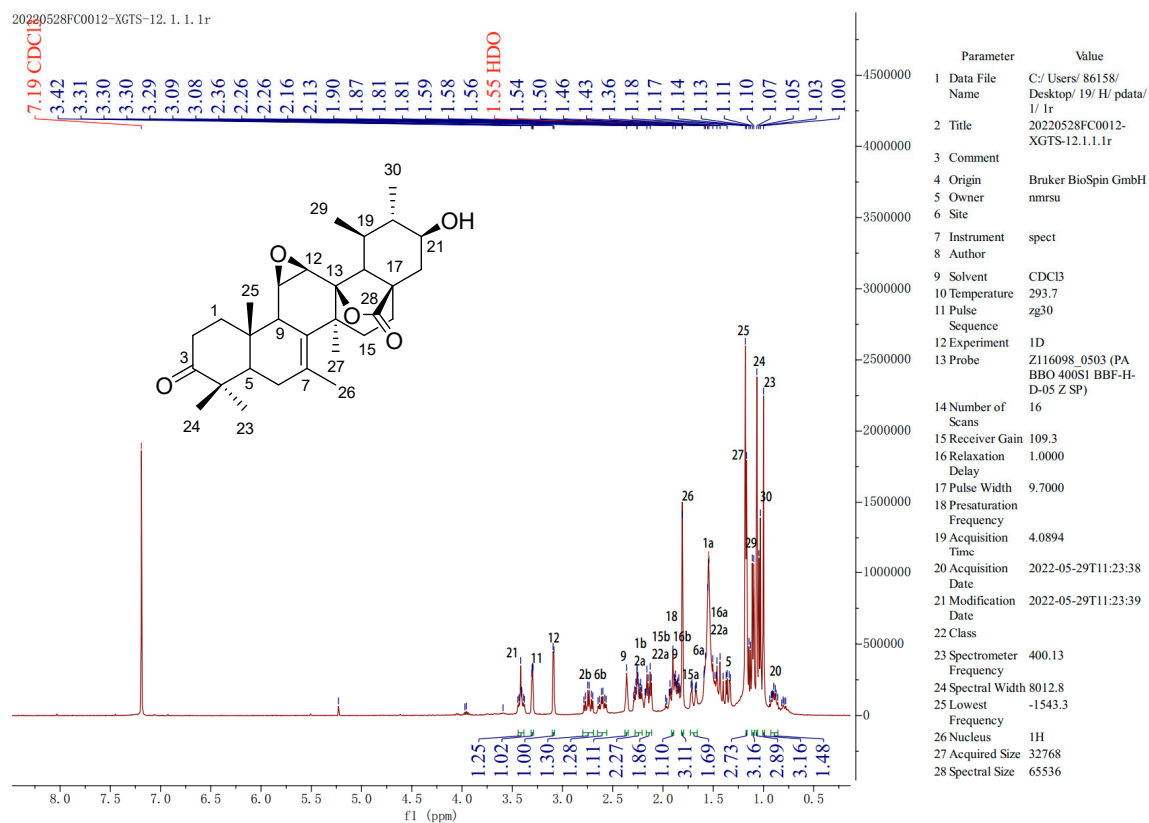

Figure S97  $^1\text{H}$  NMR spectrum (400 MHz) of compound 19 in  $\text{CDCl}_3$

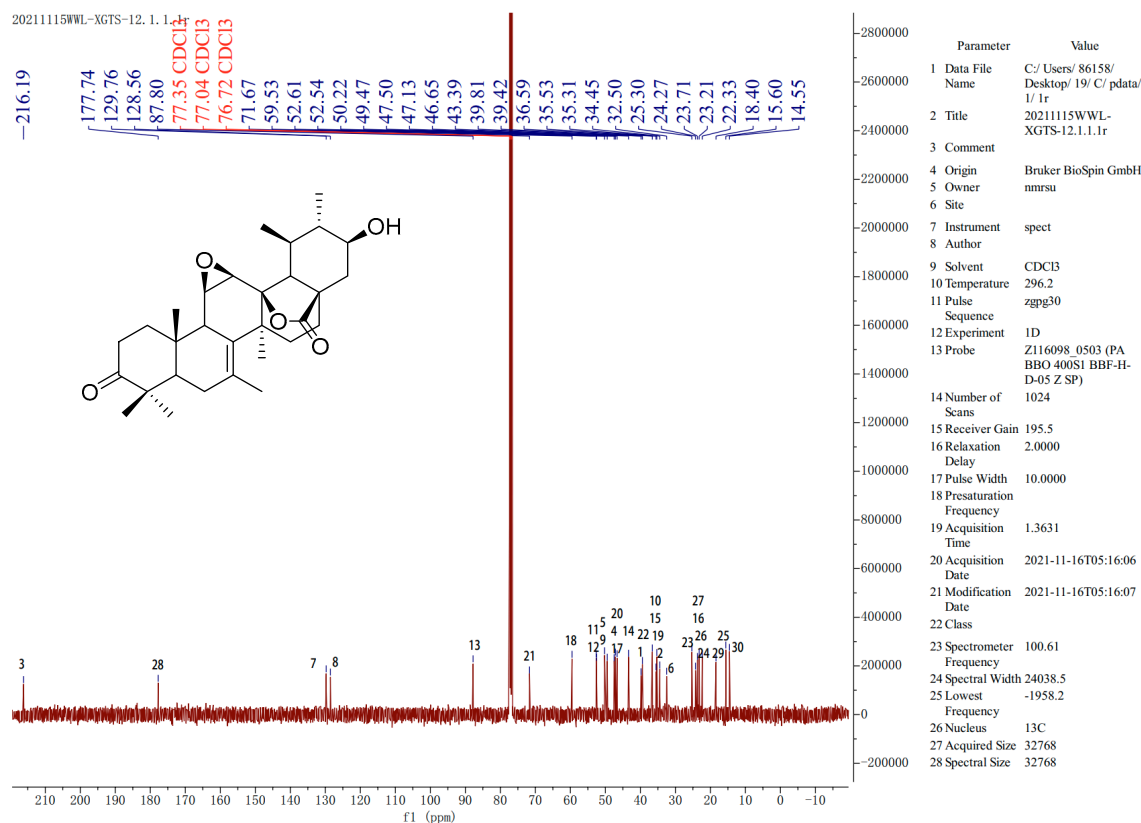

Figure S98  $^{13}\text{C}$  NMR spectrum (100 MHz) of compound 19 in  $\text{CDCl}_3$



20211116WWL-XGTS-12.1.1.1r

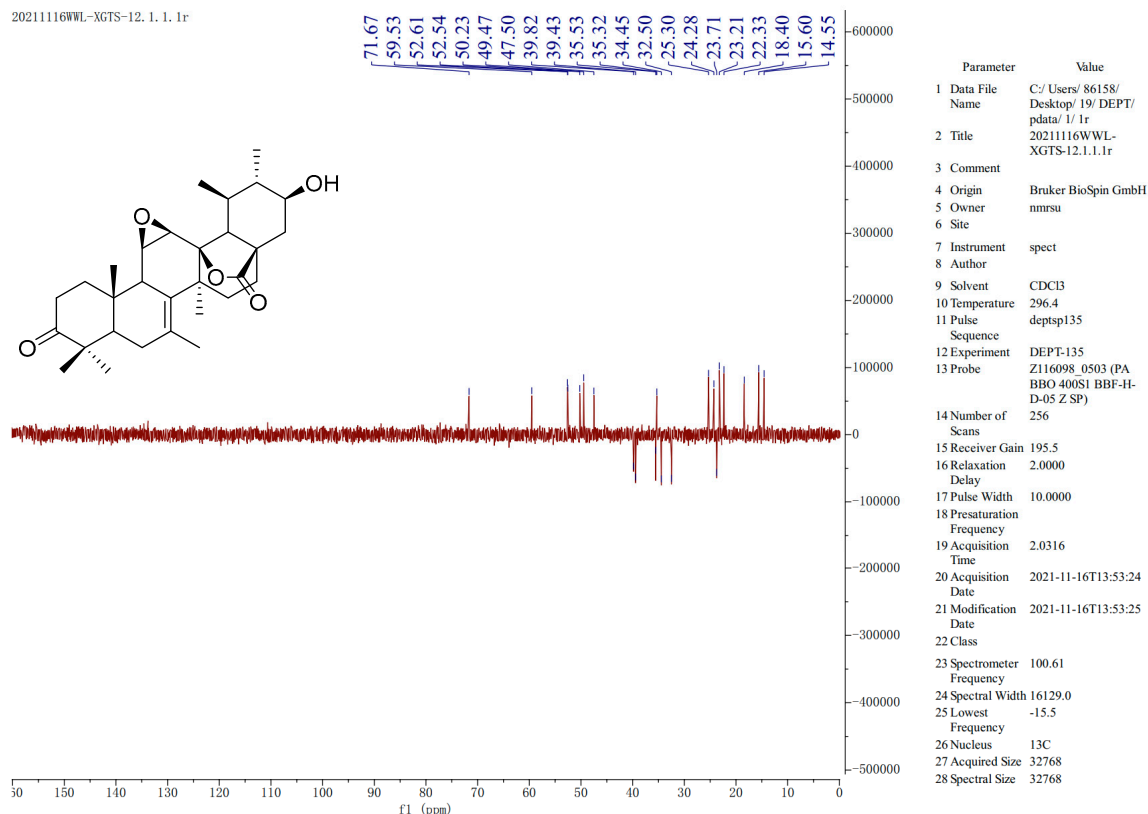Figure S99 DEPT-135 spectrum (100 MHz) of compound 19 in CDCl<sub>3</sub>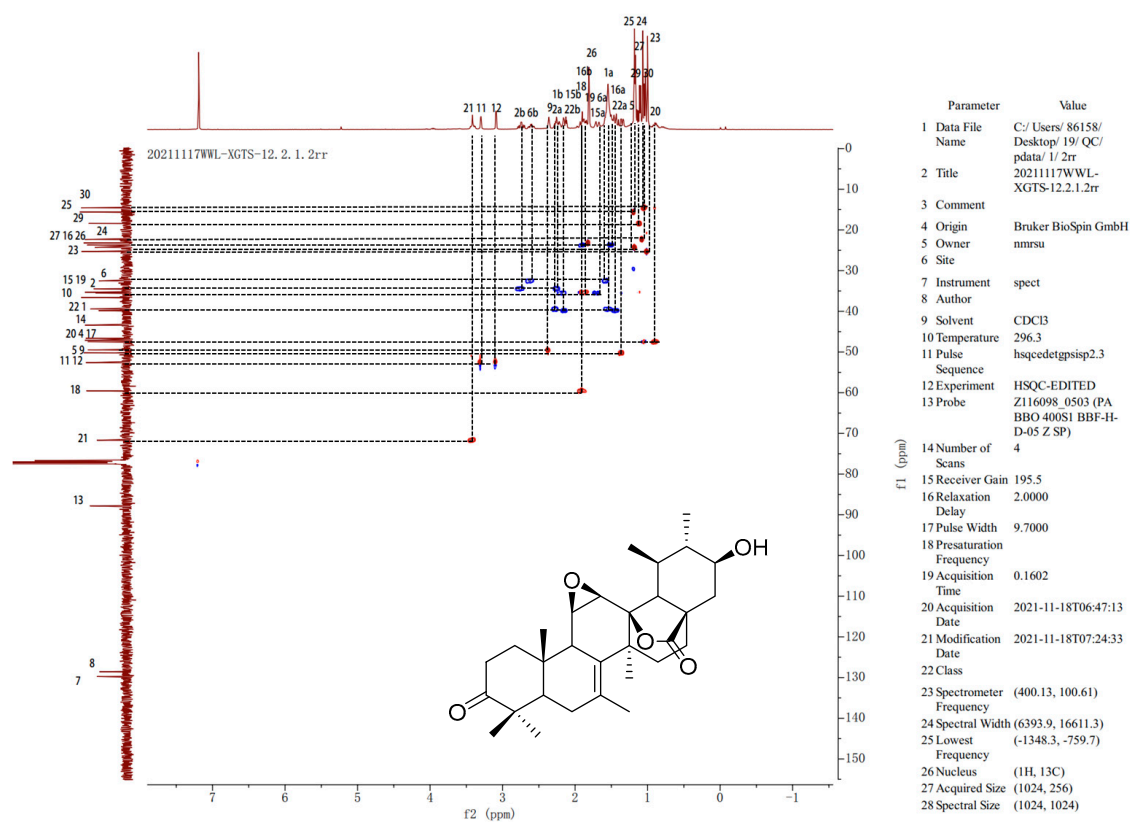Figure S100 HSQC spectrum (100 MHz) of compound 19 in CDCl<sub>3</sub>

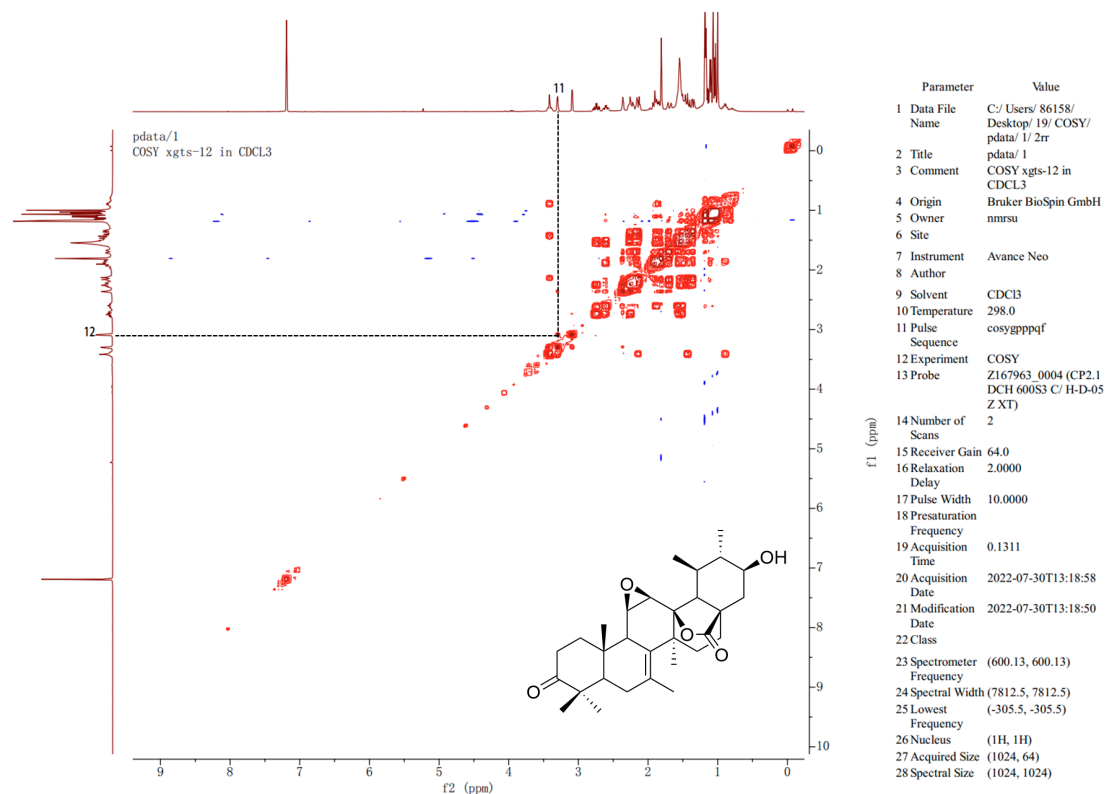

**Figure S101**  $^1\text{H}$ - $^1\text{H}$  COSY spectrum (400 MHz) of compound **19** in  $\text{CDCl}_3$

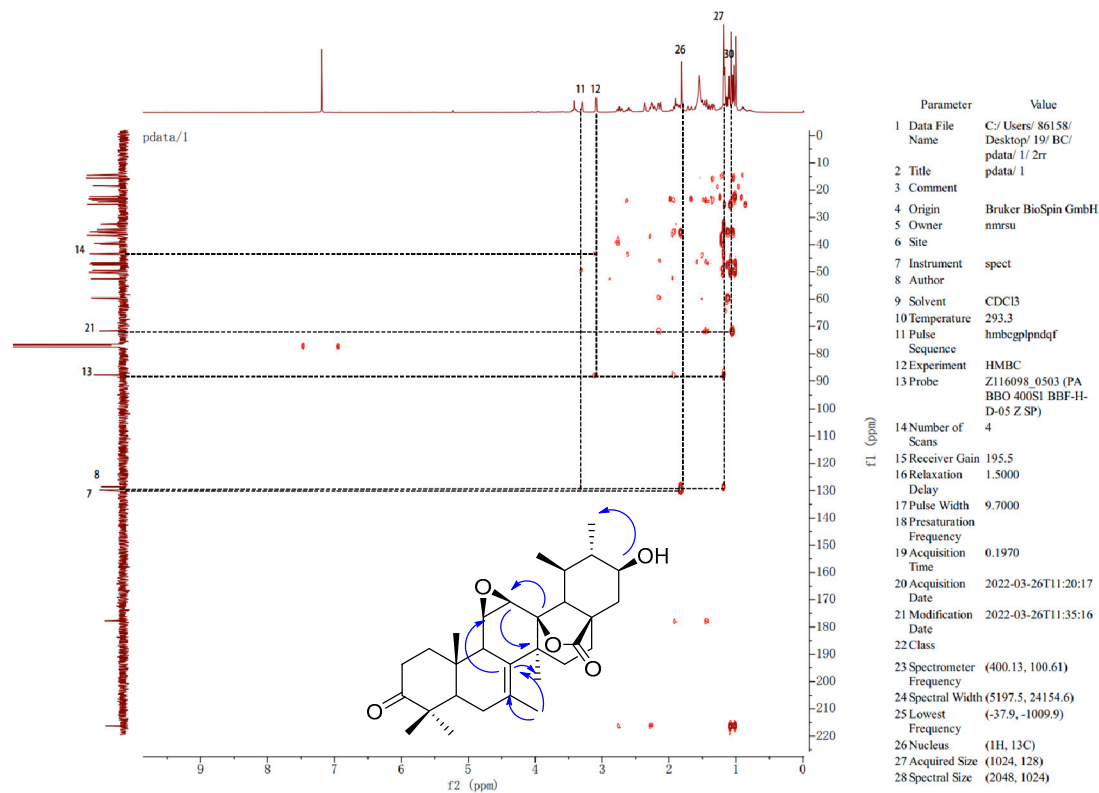

**Figure S102** HMBC spectrum (100 MHz) of compound **19** in  $\text{CDCl}_3$

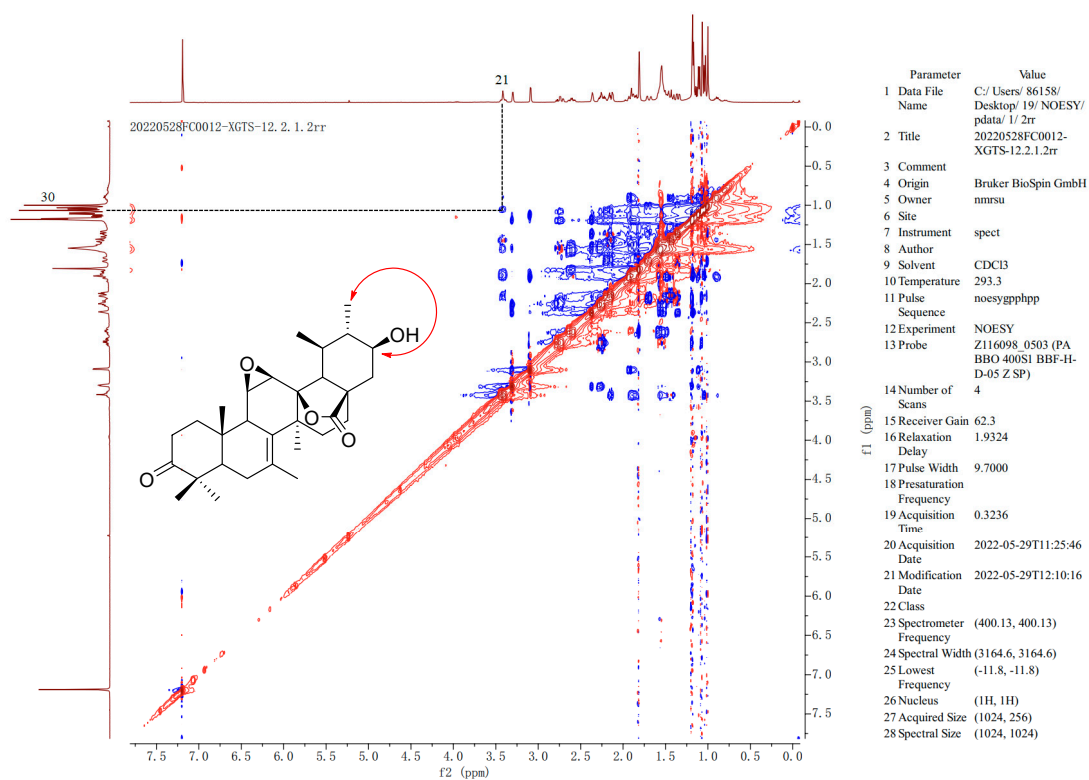

**Figure S103** NOESY spectrum (400 MHz) of compound **19** in CDCl<sub>3</sub>

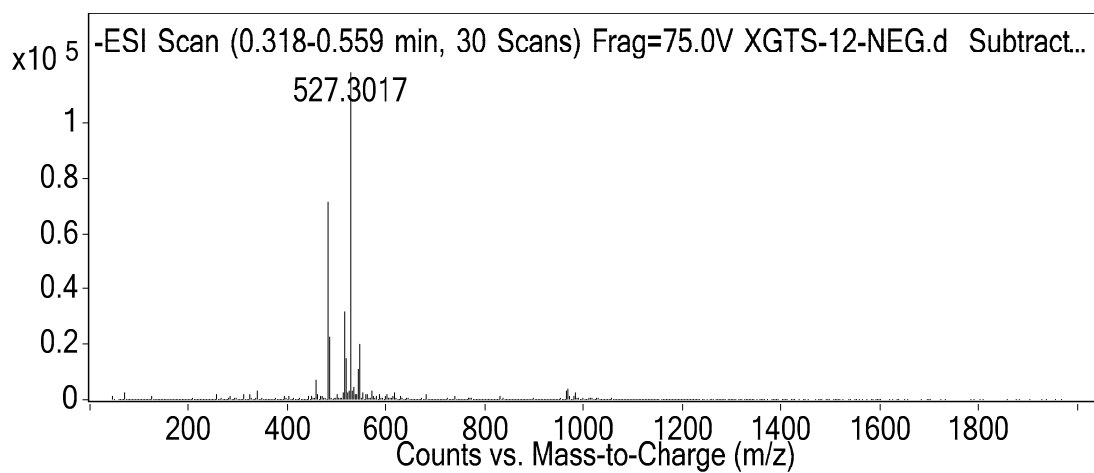

**Figure S104** HR-ESI-MS spectrum of compound **19**
